# Supplementary material
Source: Research Square preprint supplement (doi:10.21203/rs.3.rs-9173304/v1)
Supplement: Supplementary file 1 [file 82f0c044e6b8e1f125a146f7.xlsx]

## Sheet: README
	Sheet	Description
	S1	Organ specificity of each protein
	S2	Coefficients for all of the organ aging clocks
	Sheet	Column description
	S1	protein: Protein name
		UniProt: UniProt ID
		method: Platform used to measure protein (Olink/MS)
		tissue: Original tissue names
		clean_organ: Combined into larger organs/systems
	S2	protein: Protein name
		estimate: Coefficient of the given protein
		organ: Organ aging clock name
		sex: Determines which sex-stratified clock it is (Male/Female)

## Sheet: S1
protein	UniProt	method	tissue	clean_organ
A1BG	P04217	MS	liver	Liver
A2M	P01023	MS	artery.nerve	Cardiovascular.Nerve
AARSD1	Q9BTE6	Olink	muscle	Muscle
ABL1	P00519	Olink	artery	Cardiovascular
ACAA1	P09110	Olink	liver	Liver
ACAA2	P42765	MS	liver	Liver
ACP6	Q9NPH0	Olink	heart.liver	Cardiovascular.Liver
ADAMTS15	Q8TE58	Olink	adiposetissue	Adipose
ADAMTS8	Q9UP79	Olink	artery	Cardiovascular
ADAMTSL4	Q6UY14	MS	artery.nerve.stomach	Cardiovascular.Nerve.Gastrointestinal
ADCYAP1R1	P41586	Olink	brain	Brain
ADGRG1	Q9Y653	Olink	bladder.kidney.thyroid	Kidney and Bladder.Kidney and Bladder.Endocrine
ADGRG6	Q86SQ4	MS	liver	Liver
ADIPOQ	Q15848	MS	adiposetissue.lung.nerve	Adipose.Lung.Nerve
ADM	P35318	Olink	adiposetissue	Adipose
AFM	P43652	MS	liver	Liver
AGR3	Q8TD06	Olink	colon	Gastrointestinal
AGT	P01019	MS	liver.nerve	Liver.Nerve
AHSG	P02765	MS	liver	Liver
AIF1	P55008	Olink	spleen	Immune
AKR1B1	P15121	Olink	adrenalgland	Endocrine
AKT3	Q9Y243	Olink	brain	Brain
ALB	P02768	MS	liver	Liver
ALCAM	Q13740	MS	artery	Cardiovascular
ALPP	P05187	Olink	lung	Lung
AMBP	P02760	MS	liver	Liver
AMBP	P02760	Olink	liver	Liver
AMIGO2	Q86SJ2	Olink	artery	Cardiovascular
ANGPT2	O15123	Olink	artery	Cardiovascular
ANKRD54	Q6NXT1	Olink	ovary.pancreas	Ovary.Pancreas
ANPEP	P15144	MS	kidney.liver.pancreas	Kidney and Bladder.Liver.Pancreas
APBB1IP	Q7Z5R6	Olink	spleen	Immune
APCS	P02743	MS	liver	Liver
APEX1	P27695	Olink	ovary	Ovary
APMAP	Q9HDC9	MS	liver	Liver
APOA1	P02647	MS	liver	Liver
APOA2	P02652	MS	liver	Liver
APOA4	P06727	MS	liver	Liver
APOB	P04114	MS	liver	Liver
APOC1	P02654	MS	liver	Liver
APOC2	P02655	MS	liver	Liver
APOC3	P02656	MS	liver	Liver
APOC4	P55056	MS	liver.prostate	Liver.Prostate
APOD	P05090	MS	nerve	Nerve
APOE	P02649	MS	artery.liver.lung	Cardiovascular.Liver.Lung
APOF	Q13790	MS	liver	Liver
APOH	P02749	MS	liver	Liver
APOL1	O14791	MS	liver	Liver
APOM	O95445	MS	liver	Liver
AREG	P15514	Olink	bonemarrow	Immune
ARG1	P05089	Olink	liver	Liver
ARHGAP1	Q07960	Olink	artery	Cardiovascular
ARHGAP25	P42331	Olink	spleen	Immune
ATG4A	Q8WYN0	Olink	stomach	Gastrointestinal
ATOX1	O00244	Olink	liver	Liver
ATP6AP2	O75787	Olink	brain	Brain
ATRN	O75882	MS	nerve	Nerve
AZGP1	P25311	MS	liver.nerve.prostate	Liver.Nerve.Prostate
B2M	P61769	MS	spleen	Immune
BAIAP2	Q9UQB8	Olink	brain	Brain
BCHE	P06276	MS	liver	Liver
BGN	P21810	Olink	artery	Cardiovascular
BTC	P35070	Olink	skin	Skin
BTD	P43251	MS	thyroid	Endocrine
C1QA	P02745	MS	artery.spleen	Cardiovascular.Immune
C1QC	P02747	MS	artery.spleen	Cardiovascular.Immune
C1RL	Q9NZP8	MS	liver.nerve	Liver.Nerve
C1S	P09871	MS	liver	Liver
C2	P06681	MS	liver	Liver
C3	P01024	MS	liver	Liver
C4A	P0C0L4	MS	artery.liver	Cardiovascular.Liver
C4BPA	P04003	MS	liver	Liver
C4BPB	P20851	MS	liver	Liver
C4BPB	P20851	Olink	liver	Liver
C4B_2	P0C0L5	MS	liver	Liver
C5	P01031	MS	liver	Liver
C6	P13671	MS	liver	Liver
C7	P10643	MS	artery.ovary	Cardiovascular.Ovary
C8A	P07357	MS	liver	Liver
C8B	P07358	MS	liver	Liver
C8G	P07360	MS	liver	Liver
C9	P02748	MS	liver	Liver
CA1	P00915	MS	colon	Gastrointestinal
CA11	O75493	Olink	brain	Brain
CA12	O43570	Olink	colon.muscle.skin	Gastrointestinal.Muscle.Skin
CA14	Q9ULX7	Olink	brain	Brain
CA9	Q16790	Olink	stomach	Gastrointestinal
CALB1	P05937	Olink	artery.brain.kidney	Cardiovascular.Brain.Kidney and Bladder
CALCOCO1	Q9P1Z2	Olink	artery.brain	Cardiovascular.Brain
CAMKK1	Q8N5S9	Olink	brain	Brain
CAPG	P40121	Olink	esophagus.thyroid	Gastrointestinal.Endocrine
CASP8	Q14790	Olink	bonemarrow.liver	Immune.Liver
CBLN4	Q9NTU7	Olink	adrenalgland	Endocrine
CCDC126	Q96EE4	MS	heart	Cardiovascular
CCL8	P80075	Olink	adiposetissue	Adipose
CCN1	O00622	Olink	artery	Cardiovascular
CCN4	O95388	Olink	ovary	Ovary
CD14	P08571	MS	liver.lung.nerve	Liver.Lung.Nerve
CD163	Q86VB7	MS	spleen	Immune
CD1C	P29017	Olink	spleen	Immune
CD207	Q9UJ71	Olink	skin	Skin
CD27	P26842	Olink	spleen	Immune
CD28	P10747	Olink	spleen	Immune
CD300E	Q496F6	Olink	bonemarrow	Immune
CD300LF	Q8TDQ1	Olink	spleen	Immune
CD302	Q8IX05	Olink	kidney.liver	Kidney and Bladder.Liver
CD33	P20138	Olink	spleen	Immune
CD38	P28907	Olink	brain.prostate	Brain.Prostate
CD44	P16070	MS	nerve.skin	Nerve.Skin
CD5	P06127	Olink	spleen	Immune
CD5L	O43866	MS	spleen	Immune
CDC27	P30260	Olink	brain.kidney	Brain.Kidney and Bladder
CDC37	Q16543	Olink	brain.muscle	Brain.Muscle
CDH5	P33151	MS	lung	Lung
CDHR2	Q9BYE9	Olink	liver	Liver
CDKN1A	P38936	Olink	artery.colon	Cardiovascular.Gastrointestinal
CDKN2D	P55273	Olink	bonemarrow	Immune
CDNF	Q49AH0	Olink	muscle	Muscle
CEACAM1	P13688	Olink	colon	Gastrointestinal
CEACAM3	P40198	Olink	bonemarrow	Immune
CEACAM5	P06731	Olink	colon	Gastrointestinal
CEP85	Q6P2H3	Olink	heart	Cardiovascular
CES2	O00748	Olink	liver	Liver
CES3	Q6UWW8	Olink	liver	Liver
CFB	P00751	MS	liver	Liver
CFC1	P0CG37	Olink	pancreas	Pancreas
CFD	P00746	MS	nerve	Nerve
CFH	P08603	MS	artery.liver	Cardiovascular.Liver
CFHR1	Q03591	MS	liver	Liver
CFHR2	P36980	MS	liver	Liver
CFHR3	Q02985	MS	liver	Liver
CFHR4	Q92496	MS	liver	Liver
CFHR5	Q9BXR6	MS	liver	Liver
CFI	P05156	MS	liver.nerve	Liver.Nerve
CFP	P27918	MS	spleen	Immune
CHAC2	Q8WUX2	Olink	muscle	Muscle
CHL1	O00533	MS	brain.nerve	Brain.Nerve
CIAPIN1	Q6FI81	Olink	brain.heart	Brain.Cardiovascular
CLEC3B	P05452	MS	adiposetissue	Adipose
CLEC6A	Q6EIG7	Olink	bonemarrow.spleen	Immune.Immune
CLMP	Q9H6B4	Olink	adiposetissue	Adipose
CLU	P10909	MS	artery.liver.lung	Cardiovascular.Liver.Lung
CNDP1	Q96KN2	MS	brain	Brain
CNPY4	Q8N129	Olink	artery	Cardiovascular
CNTN2	Q02246	Olink	brain	Brain
COL6A3	P12111	MS	adiposetissue.lung.nerve	Adipose.Lung.Nerve
COMP	P49747	MS	artery	Cardiovascular
COX5B	P10606	Olink	heart	Cardiovascular
CP	P00450	MS	liver	Liver
CPB2	Q96IY4	MS	liver	Liver
CPE	P16870	Olink	brain	Brain
CPN1	P15169	MS	liver	Liver
CPN2	P22792	MS	liver	Liver
CPVL	Q9H3G5	Olink	heart.thyroid	Cardiovascular.Endocrine
CPXM1	Q96SM3	Olink	bonemarrow.ovary.thyroid	Immune.Ovary.Endocrine
CREG1	O75629	Olink	liver.spleen	Liver.Immune
CRH	P06850	Olink	pancreas	Pancreas
CRISP2	P16562	Olink	bonemarrow.esophagus.skin	Immune.Gastrointestinal.Skin
CRISP3	P54108	MS	esophagus	Gastrointestinal
CRNN	Q9UBG3	Olink	esophagus	Gastrointestinal
CRP	P02741	MS	liver	Liver
CRTAC1	Q9NQ79	MS	brain	Brain
CSF1R	P07333	MS	spleen	Immune
CST3	P01034	MS	artery.brain	Cardiovascular.Brain
CTSF	Q9UBX1	Olink	artery.liver.muscle	Cardiovascular.Liver.Muscle
CTSV	O60911	Olink	skin	Skin
CXCL8	P10145	Olink	bonemarrow	Immune
DAB2	P98082	Olink	kidney	Kidney and Bladder
DBH	P09172	MS	liver	Liver
DCBLD2	Q96PD2	Olink	heart.thyroid	Cardiovascular.Endocrine
DCTN1	Q14203	Olink	brain.heart	Brain.Cardiovascular
DCTN2	Q13561	Olink	brain	Brain
DCXR	Q7Z4W1	Olink	liver	Liver
DDAH1	O94760	Olink	brain	Brain
DDX58	O95786	Olink	liver	Liver
DEFB4A_DEFB4B	O15263	Olink	esophagus	Gastrointestinal
DKKL1	Q9UK85	Olink	pancreas	Pancreas
DLL1	O00548	Olink	heart.spleen	Cardiovascular.Immune
DNAJB1	P25685	Olink	esophagus	Gastrointestinal
DPEP2	Q9H4A9	Olink	spleen	Immune
DPP6	P42658	Olink	brain	Brain
DPY30	Q9C005	Olink	brain	Brain
DRG2	P55039	Olink	muscle	Muscle
DSG2	Q14126	MS	colon	Gastrointestinal
DSG3	P32926	Olink	esophagus	Gastrointestinal
DSG4	Q86SJ6	Olink	skin	Skin
DTX3	Q8N9I9	Olink	brain	Brain
ECM1	Q16610	MS	esophagus	Gastrointestinal
EDA2R	Q9HAV5	Olink	artery	Cardiovascular
EFEMP1	Q12805	MS	artery	Cardiovascular
EGFL7	Q9UHF1	Olink	heart	Cardiovascular
ELOA	Q14241	Olink	pancreas	Pancreas
ENTPD2	Q9Y5L3	Olink	nerve	Nerve
EPHA2	P29317	Olink	esophagus	Gastrointestinal
EPS8L2	Q9H6S3	Olink	liver	Liver
ERBB2	P04626	Olink	nerve.skin	Nerve.Skin
ERBB4	Q15303	Olink	heart.muscle	Cardiovascular.Muscle
ERBIN	Q96RT1	Olink	liver	Liver
ERP44	Q9BS26	Olink	liver	Liver
F10	P00742	MS	liver.nerve	Liver.Nerve
F11	P03951	MS	liver	Liver
F12	P00748	MS	liver	Liver
F13B	P05160	MS	liver	Liver
F2	P00734	MS	liver	Liver
F3	P13726	Olink	brain	Brain
F5	P12259	MS	liver	Liver
F7	P08709	MS	liver	Liver
F9	P00740	MS	liver	Liver
FAM3B	P58499	Olink	esophagus.pancreas.stomach	Gastrointestinal.Pancreas.Gastrointestinal
FBLN1	P23142	MS	artery	Cardiovascular
FCGR2B	P31994	Olink	spleen	Immune
FCGR3A	P08637	MS	spleen	Immune
FCGR3B	O75015	MS	spleen	Immune
FCN2	Q15485	MS	liver	Liver
FCN3	O75636	MS	lung	Lung
FCRLB	Q6BAA4	Olink	kidney	Kidney and Bladder
FEN1	P39748	Olink	bonemarrow.spleen	Immune.Immune
FETUB	Q9UGM5	MS	liver	Liver
FGA	P02671	MS	liver	Liver
FGB	P02675	MS	liver	Liver
FGF21	Q9NSA1	Olink	liver	Liver
FGF23	Q9GZV9	Olink	liver	Liver
FGFBP1	Q14512	Olink	esophagus	Gastrointestinal
FGFR2	P21802	Olink	brain.skin	Brain.Skin
FGG	P02679	MS	liver	Liver
FLNA	P21333	MS	artery	Cardiovascular
FLT1	P17948	Olink	adiposetissue.artery.kidney	Adipose.Cardiovascular.Kidney and Bladder
FLT3	P36888	Olink	bonemarrow	Immune
FLT4	P35916	Olink	muscle.spleen	Muscle.Immune
FN1	P02751	MS	artery	Cardiovascular
FOLR1	P15328	Olink	lung	Lung
FOLR3	P41439	Olink	lung	Lung
FOXO3	O43524	Olink	adiposetissue.artery.muscle	Adipose.Cardiovascular.Muscle
FURIN	P09958	Olink	liver	Liver
FUS	P35637	Olink	ovary	Ovary
FXN	Q16595	Olink	ovary	Ovary
GALNT10	Q86SR1	Olink	ovary	Ovary
GALNT2	Q10471	Olink	liver	Liver
GALNT7	Q86SF2	Olink	colon	Gastrointestinal
GC	P02774	MS	liver	Liver
GCG	P01275	Olink	pancreas	Pancreas
GCNT1	Q02742	Olink	colon.muscle.stomach	Gastrointestinal.Muscle.Gastrointestinal
GFAP	P14136	Olink	brain	Brain
GFOD2	Q3B7J2	Olink	liver	Liver
GFRA1	P56159	Olink	adiposetissue.lung.nerve	Adipose.Lung.Nerve
GFRA2	O00451	Olink	brain	Brain
GGH	Q92820	MS	liver	Liver
GH2	P01242	Olink	spleen	Immune
GNE	Q9Y223	Olink	liver	Liver
GP1BA	P07359	MS	bonemarrow.lung.spleen	Immune.Lung.Immune
GP5	P40197	MS	bonemarrow.spleen	Immune.Immune
GPA33	Q99795	Olink	colon	Gastrointestinal
GPC1	P35052	Olink	muscle	Muscle
GPLD1	P80108	MS	liver	Liver
GPX3	P22352	MS	kidney	Kidney and Bladder
GSAP	A4D1B5	Olink	spleen	Immune
GSN	P06396	MS	artery	Cardiovascular
GSTA3	Q16772	Olink	adrenalgland	Endocrine
HABP2	Q14520	MS	liver	Liver
HAGH	Q16775	Olink	liver	Liver
HAO1	Q9UJM8	Olink	liver	Liver
HAVCR1	Q96D42	Olink	kidney	Kidney and Bladder
HBA2	P69905	MS	spleen	Immune
HBB	P68871	MS	spleen	Immune
HBD	P02042	MS	spleen	Immune
HBEGF	Q99075	Olink	colon.esophagus	Gastrointestinal.Gastrointestinal
HBQ1	P09105	Olink	bonemarrow.lung	Immune.Lung
HGFAC	Q04756	MS	liver	Liver
HGS	O14964	Olink	brain	Brain
HMBS	P08397	Olink	bonemarrow	Immune
HP	P00738	MS	liver	Liver
HPGDS	O60760	Olink	brain.skin	Brain.Skin
HPR	P00739	MS	liver	Liver
HPX	P02790	MS	liver	Liver
HRG	P04196	MS	liver	Liver
HS3ST3B1	Q9Y662	Olink	liver	Liver
HS6ST1	O60243	Olink	nerve	Nerve
HSPB6	O14558	Olink	muscle	Muscle
HSPG2	P98160	MS	artery	Cardiovascular
ICAM1	P05362	MS	lung	Lung
ICAM2	P13598	MS	spleen	Immune
ICOSLG	O75144	Olink	brain.thyroid	Brain.Endocrine
IDUA	P35475	Olink	pancreas	Pancreas
IGF1	P05019	MS	adiposetissue	Adipose
IGF1R	P08069	Olink	brain	Brain
IGF2	P01344	MS	liver	Liver
IGFALS	P35858	MS	liver	Liver
IGFBP2	P18065	MS	artery	Cardiovascular
IGFBP3	P17936	MS	artery.liver	Cardiovascular.Liver
IGHA1	P01876	MS	nerve.stomach	Nerve.Gastrointestinal
IGHA2	P01877	MS	colon	Gastrointestinal
IGHG1	P01857	MS	nerve.spleen	Nerve.Immune
IGHG2	P01859	MS	nerve.spleen	Nerve.Immune
IGHG4	P01861	MS	nerve.spleen	Nerve.Immune
IGHM	P01871	MS	artery.spleen.stomach	Cardiovascular.Immune.Gastrointestinal
IGHV1-2	P23083	MS	colon.nerve.stomach	Gastrointestinal.Nerve.Gastrointestinal
IGHV1-24	A0A0C4DH33	MS	nerve	Nerve
IGHV1-46	P01743	MS	colon.nerve.spleen	Gastrointestinal.Nerve.Immune
IGHV2-26	A0A0B4J1V2	MS	heart.stomach	Cardiovascular.Gastrointestinal
IGHV2-5	P01817	MS	colon.liver.nerve	Gastrointestinal.Liver.Nerve
IGHV2-70D	A0A0C4DH43	MS	colon.nerve.stomach	Gastrointestinal.Nerve.Gastrointestinal
IGHV3-11	P01762	MS	colon	Gastrointestinal
IGHV3-15	A0A0B4J1V0	MS	colon.nerve.prostate	Gastrointestinal.Nerve.Prostate
IGHV3-21	A0A0B4J1V1	MS	artery.colon.nerve	Cardiovascular.Gastrointestinal.Nerve
IGHV3-23	P01764	MS	colon.nerve	Gastrointestinal.Nerve
IGHV3-35	A0A0C4DH35	MS	lung.nerve.spleen	Lung.Nerve.Immune
IGHV3-38	A0A0C4DH36	MS	nerve.spleen	Nerve.Immune
IGHV3-49	A0A0A0MS15	MS	colon.nerve.stomach	Gastrointestinal.Nerve.Gastrointestinal
IGHV3-64	A0A075B6Q5	MS	muscle.stomach	Muscle.Gastrointestinal
IGHV3-7	P01780	MS	colon.nerve	Gastrointestinal.Nerve
IGHV4-28	A0A0C4DH34	MS	colon.heart.nerve	Gastrointestinal.Cardiovascular.Nerve
IGHV5-10-1	A0A0J9YXX1	MS	colon.prostate	Gastrointestinal.Prostate
IGHV5-51	A0A0C4DH38	MS	colon.nerve	Gastrointestinal.Nerve
IGHV6-1	A0A0B4J1U7	MS	colon.nerve	Gastrointestinal.Nerve
IGKJ1	A0A0A0MT89	MS	colon	Gastrointestinal
IGKV1-16	P04430	MS	colon.nerve	Gastrointestinal.Nerve
IGKV1-17	P01599	MS	colon.kidney	Gastrointestinal.Kidney and Bladder
IGKV1-5	P01602	MS	nerve	Nerve
IGKV1-8	A0A0C4DH67	MS	muscle.prostate.spleen	Muscle.Prostate.Immune
IGKV3-11	P04433	MS	colon.nerve	Gastrointestinal.Nerve
IGKV3-20	P01619	MS	colon	Gastrointestinal
IGKV3D-20	A0A0C4DH25	MS	colon.nerve	Gastrointestinal.Nerve
IGKV4-1	P06312	MS	colon.nerve	Gastrointestinal.Nerve
IGKV6-21	A0A0C4DH24	MS	colon.nerve.prostate	Gastrointestinal.Nerve.Prostate
IGLL1	P15814	MS	bonemarrow.nerve	Immune.Nerve
IGLL5	B9A064	MS	nerve.spleen	Nerve.Immune
IGLV1-36	A0A0B4J1U3	MS	ovary	Ovary
IGLV1-40	P01703	MS	nerve	Nerve
IGLV1-47	P01700	MS	nerve	Nerve
IGLV1-51	P01701	MS	nerve	Nerve
IGLV2-11	P01706	MS	colon.kidney.nerve	Gastrointestinal.Kidney and Bladder.Nerve
IGLV2-14	P01704	MS	colon.nerve	Gastrointestinal.Nerve
IGLV2-18	A0A075B6J9	MS	colon.nerve	Gastrointestinal.Nerve
IGLV2-23	P01705	MS	colon.spleen	Gastrointestinal.Immune
IGLV2-8	P01709	MS	colon	Gastrointestinal
IGLV3-10	A0A075B6K4	MS	nerve	Nerve
IGLV3-19	P01714	MS	colon.nerve	Gastrointestinal.Nerve
IGLV3-27	P01718	MS	muscle.spleen	Muscle.Immune
IGLV3-9	A0A075B6K5	MS	nerve	Nerve
IGLV4-60	A0A075B6I1	MS	colon	Gastrointestinal
IGLV4-69	A0A075B6H9	MS	muscle	Muscle
IGLV6-57	P01721	MS	artery	Cardiovascular
IGLV7-46	A0A075B6I9	MS	colon.nerve.ovary	Gastrointestinal.Nerve.Ovary
IGLV8-61	A0A075B6I0	MS	nerve.spleen	Nerve.Immune
IGSF3	O75054	Olink	brain.skin	Brain.Skin
IKZF2	Q9UKS7	Olink	esophagus	Gastrointestinal
IL12A_IL12B	P29459	Olink	esophagus	Gastrointestinal
IL13RA1	P78552	Olink	heart	Cardiovascular
IL1RAP	Q9NPH3	MS	liver	Liver
IL6	P05231	Olink	esophagus	Gastrointestinal
INHBC	P55103	MS	liver	Liver
INPP1	P49441	Olink	brain.heart	Brain.Cardiovascular
INPPL1	O15357	Olink	heart	Cardiovascular
IQGAP2	Q13576	Olink	liver	Liver
ITGAV	P06756	Olink	artery.heart	Cardiovascular.Cardiovascular
ITGB1BP1	O14713	Olink	adiposetissue.liver	Adipose.Liver
ITGB5	P18084	Olink	artery	Cardiovascular
ITGB7	P26010	Olink	spleen	Immune
ITIH1	P19827	MS	liver	Liver
ITIH2	P19823	MS	liver	Liver
ITIH3	Q06033	MS	liver	Liver
ITIH4	Q14624	MS	liver	Liver
JCHAIN	P01591	MS	colon	Gastrointestinal
KAZALD1	Q96I82	Olink	spleen	Immune
KDR	P35968	Olink	adiposetissue	Adipose
KIFBP	Q96EK5	Olink	brain	Brain
KIR2DL3	P43628	Olink	spleen	Immune
KIR3DL1	P43629	Olink	spleen	Immune
KLK1	P06870	Olink	pancreas	Pancreas
KLK10	O43240	Olink	esophagus	Gastrointestinal
KLK11	Q9UBX7	Olink	prostate.spleen	Prostate.Immune
KLK12	Q9UKR0	Olink	esophagus	Gastrointestinal
KLK13	Q9UKR3	Olink	esophagus	Gastrointestinal
KLK14	Q9P0G3	Olink	skin	Skin
KLK4	Q9Y5K2	Olink	prostate	Prostate
KLK6	Q92876	Olink	brain	Brain
KLK8	O60259	Olink	skin	Skin
KLKB1	P03952	MS	liver	Liver
KNG1	P01042	MS	liver	Liver
KRT18	P05783	Olink	pancreas	Pancreas
L1CAM	P32004	Olink	brain.nerve	Brain.Nerve
LAG3	P18627	Olink	ovary	Ovary
LAT2	Q9GZY6	Olink	spleen	Immune
LBP	P18428	MS	liver	Liver
LCAT	P04180	MS	liver	Liver
LCP1	P13796	MS	spleen	Immune
LDHB	P07195	MS	kidney	Kidney and Bladder
LEFTY2	O00292	Olink	artery	Cardiovascular
LGALS3BP	Q08380	MS	artery.heart	Cardiovascular.Cardiovascular
LGALS7_LGALS7B	P47929	Olink	skin	Skin
LHB	P01229	Olink	pancreas	Pancreas
LPA	P08519	MS	liver	Liver
LPCAT2	Q7L5N7	Olink	bonemarrow.colon.thyroid	Immune.Gastrointestinal.Endocrine
LRG1	P02750	MS	liver.nerve	Liver.Nerve
LRIG1	Q96JA1	Olink	brain	Brain
LRP1	Q07954	Olink	artery	Cardiovascular
LRRC25	Q8N386	Olink	spleen	Immune
LSM1	O15116	Olink	heart	Cardiovascular
LTA4H	P09960	Olink	esophagus	Gastrointestinal
LTBP3	Q9NS15	Olink	artery	Cardiovascular
LUM	P51884	MS	heart.nerve	Cardiovascular.Nerve
LYN	P07948	Olink	spleen	Immune
LYPD3	O95274	Olink	esophagus	Gastrointestinal
LYPD8	Q6UX82	Olink	colon	Gastrointestinal
LYVE1	Q9Y5Y7	MS	adiposetissue.nerve	Adipose.Nerve
LYZ	P61626	MS	artery.bonemarrow.stomach	Cardiovascular.Immune.Gastrointestinal
MAEA	Q7L5Y9	Olink	brain.stomach	Brain.Gastrointestinal
MANSC1	Q9H8J5	Olink	artery.stomach	Cardiovascular.Gastrointestinal
MAP3K5	Q99683	Olink	adrenalgland	Endocrine
MASP1	P48740	MS	liver	Liver
MASP2	O00187	MS	artery.liver	Cardiovascular.Liver
MAVS	Q7Z434	Olink	muscle	Muscle
MBL2	P11226	MS	liver	Liver
MDK	P21741	Olink	ovary	Ovary
MED18	Q9BUE0	Olink	bladder.liver.muscle	Kidney and Bladder.Liver.Muscle
METAP2	P50579	Olink	muscle	Muscle
MIA	Q16674	Olink	nerve.stomach	Nerve.Gastrointestinal
MINPP1	Q9UNW1	MS	artery.lung	Cardiovascular.Lung
MME	P08473	Olink	kidney	Kidney and Bladder
MMP12	P39900	Olink	colon	Gastrointestinal
MMP9	P14780	MS	spleen	Immune
MMRN1	Q13201	MS	brain.esophagus.spleen	Brain.Gastrointestinal.Immune
MOG	Q16653	Olink	brain	Brain
MSLN	Q13421	Olink	lung	Lung
MSRA	Q9UJ68	Olink	liver	Liver
MUC16	Q8WXI7	Olink	skin	Skin
NAMPT	P43490	Olink	liver	Liver
NBL1	P41271	Olink	brain.ovary	Brain.Ovary
NCS1	P62166	Olink	brain	Brain
NDUFS6	O75380	Olink	heart	Cardiovascular
NECTIN4	Q96NY8	Olink	esophagus.skin	Gastrointestinal.Skin
NELL1	Q92832	Olink	brain	Brain
NFKBIE	O00221	Olink	spleen	Immune
NINJ1	Q92982	Olink	bonemarrow	Immune
NPTN	Q9Y639	Olink	brain	Brain
NPY	P01303	Olink	prostate	Prostate
NRP1	O14786	MS	adiposetissue.nerve.spleen	Adipose.Nerve.Immune
NT5E	P21589	Olink	artery	Cardiovascular
NTF4	P34130	Olink	skin	Skin
NUCB2	P80303	Olink	bonemarrow	Immune
OGFR	Q9NZT2	Olink	liver	Liver
OMG	P23515	Olink	brain	Brain
OPTC	Q9UBM4	Olink	skin	Skin
OPTN	Q96CV9	MS	muscle	Muscle
ORM1	P02763	MS	liver	Liver
ORM2	P19652	MS	liver	Liver
P4HB	P07237	Olink	pancreas	Pancreas
PCOLCE	Q15113	MS	artery	Cardiovascular
PDCD1	Q15116	Olink	spleen	Immune
PDCD1LG2	Q9BQ51	Olink	adiposetissue	Adipose
PDGFC	Q9NRA1	Olink	artery	Cardiovascular
PDP1	Q9P0J1	Olink	heart	Cardiovascular
PEPD	P12955	MS	kidney	Kidney and Bladder
PF4	P02776	MS	spleen	Immune
PF4V1	P10720	MS	spleen	Immune
PFKFB2	O60825	Olink	colon	Gastrointestinal
PGLYRP2	Q96PD5	MS	liver	Liver
PI16	Q6UXB8	MS	nerve	Nerve
PIGR	P01833	MS	colon	Gastrointestinal
PLA2G15	Q8NCC3	Olink	heart	Cardiovascular
PLG	P00747	MS	liver	Liver
PLTP	P55058	MS	artery.pancreas	Cardiovascular.Pancreas
PLXDC1	Q8IUK5	Olink	brain.heart.nerve	Brain.Cardiovascular.Nerve
PLXDC2	Q6UX71	MS	nerve	Nerve
PODXL	O00592	Olink	lung	Lung
PODXL2	Q9NZ53	Olink	brain	Brain
POLR2F	P61218	Olink	bladder.bonemarrow	Kidney and Bladder.Immune
PON1	P27169	MS	liver	Liver
PON3	Q15166	MS	liver	Liver
PPBP	P02775	MS	spleen	Immune
PPME1	Q9Y570	Olink	brain	Brain
PPP1R12A	O14974	Olink	artery.prostate	Cardiovascular.Prostate
PPY	P01298	Olink	pancreas	Pancreas
PQBP1	O60828	Olink	ovary	Ovary
PRDX6	P30041	Olink	adiposetissue.liver.muscle	Adipose.Liver.Muscle
PRG4	Q92954	MS	liver	Liver
PRKRA	O75569	Olink	muscle	Muscle
PROC	P04070	MS	liver	Liver
PROCR	Q9UNN8	MS	artery.nerve	Cardiovascular.Nerve
PROS1	P07225	MS	artery.brain.liver	Cardiovascular.Brain.Liver
PROZ	P22891	MS	liver	Liver
PRTG	Q2VWP7	Olink	thyroid	Endocrine
PSMA1	P25786	Olink	liver	Liver
PSRC1	Q6PGN9	Olink	brain	Brain
PTGDS	P41222	MS	brain	Brain
PVALB	P20472	Olink	brain.kidney	Brain.Kidney and Bladder
PVR	P15151	MS	heart	Cardiovascular
PZP	P20742	MS	liver	Liver
QSOX1	O00391	MS	artery.esophagus	Cardiovascular.Gastrointestinal
RAD23B	P54727	Olink	liver.muscle	Liver.Muscle
RARRES1	P49788	Olink	artery	Cardiovascular
RARRES2	Q99969	MS	artery	Cardiovascular
RASSF2	P50749	Olink	bonemarrow.liver.spleen	Immune.Liver.Immune
RBP2	P50120	Olink	colon.lung.stomach	Gastrointestinal.Lung.Gastrointestinal
RBP4	P02753	MS	liver	Liver
RBP5	P82980	Olink	liver	Liver
RET	P07949	Olink	brain	Brain
RILP	Q96NA2	Olink	brain	Brain
RNF41	Q9H4P4	Olink	heart	Cardiovascular
RP2	O75695	Olink	bonemarrow	Immune
RRM2	P31350	Olink	bonemarrow.esophagus	Immune.Gastrointestinal
RRM2B	Q7LG56	Olink	muscle	Muscle
RSPO3	Q9BXY4	Olink	adiposetissue.thyroid	Adipose.Endocrine
RTBDN	Q9BSG5	Olink	brain	Brain
RTN4R	Q9BZR6	Olink	brain.liver.skin	Brain.Liver.Skin
RUVBL1	Q9Y265	Olink	heart.nerve	Cardiovascular.Nerve
S100A12	P80511	Olink	spleen	Immune
S100A4	P26447	Olink	artery	Cardiovascular
SAA1	P0DJI8	MS	liver	Liver
SAA2	P0DJI9	MS	liver	Liver
SAA4	P35542	MS	liver	Liver
SCAMP3	O14828	Olink	brain	Brain
SCG2	P13521	Olink	brain	Brain
SCLY	Q96I15	Olink	liver	Liver
SCP2	P22307	Olink	liver	Liver
SELENOP	P49908	MS	liver	Liver
SELL	P14151	MS	spleen	Immune
SEMA4C	Q9C0C4	Olink	muscle.nerve.skin	Muscle.Nerve.Skin
SERPINA1	P01009	MS	liver	Liver
SERPINA10	Q9UK55	MS	liver	Liver
SERPINA3	P01011	MS	liver	Liver
SERPINA4	P29622	MS	liver	Liver
SERPINA6	P08185	MS	liver	Liver
SERPINA7	P05543	MS	liver	Liver
SERPINA9	Q86WD7	Olink	skin	Skin
SERPINC1	P01008	MS	liver	Liver
SERPIND1	P05546	MS	liver	Liver
SERPINF1	P36955	MS	liver	Liver
SERPINF2	P08697	MS	liver	Liver
SERPING1	P05155	MS	liver	Liver
SEZ6L	Q9BYH1	Olink	brain	Brain
SEZ6L2	Q6UXD5	Olink	brain	Brain
SFTPA1	Q8IWL2	Olink	lung	Lung
SFTPA2	Q8IWL1	Olink	lung	Lung
SH2B3	Q9UQQ2	Olink	bonemarrow	Immune
SHBG	P04278	MS	liver	Liver
SIAE	Q9HAT2	Olink	colon.heart	Gastrointestinal.Cardiovascular
SIGLEC6	O43699	Olink	esophagus.lung.skin	Gastrointestinal.Lung.Skin
SIGLEC9	Q9Y336	Olink	spleen	Immune
SIRT2	Q8IXJ6	Olink	brain.muscle	Brain.Muscle
SLAMF6	Q96DU3	Olink	spleen	Immune
SLAMF8	Q9P0V8	Olink	ovary.spleen	Ovary.Immune
SLC3A2	P08195	MS	brain.kidney.liver	Brain.Kidney and Bladder.Liver
SLITRK2	Q9H156	Olink	nerve	Nerve
SMAD5	Q99717	Olink	liver	Liver
SMOC1	Q9H4F8	Olink	liver	Liver
SNAP29	O95721	Olink	brain	Brain
SOD3	P08294	MS	artery	Cardiovascular
SORCS2	Q96PQ0	Olink	nerve	Nerve
SORD	Q00796	Olink	liver	Liver
SPARC	P09486	MS	spleen	Immune
SPARC	P09486	Olink	spleen	Immune
SPINK6	Q6UWN8	Olink	adiposetissue	Adipose
SPP2	Q13103	MS	liver	Liver
SPTA1	P02549	MS	bonemarrow	Immune
SRC	P12931	Olink	brain.pancreas	Brain.Pancreas
ST3GAL1	Q11201	Olink	heart	Cardiovascular
STAT5B	P51692	Olink	adiposetissue.ovary.pancreas	Adipose.Ovary.Pancreas
STX16	O14662	Olink	pancreas.spleen	Pancreas.Immune
STX4	Q12846	Olink	pancreas.prostate	Pancreas.Prostate
STX6	O43752	Olink	brain	Brain
STXBP3	O00186	Olink	muscle	Muscle
SUGT1	Q9Y2Z0	Olink	brain	Brain
TACC3	Q9Y6A5	Olink	bonemarrow.liver.skin	Immune.Liver.Skin
TACSTD2	P09758	Olink	esophagus	Gastrointestinal
TAFA5	Q7Z5A7	Olink	nerve	Nerve
TBC1D23	Q9NUY8	Olink	pancreas	Pancreas
TBL1X	O60907	Olink	artery.ovary	Cardiovascular.Ovary
TEK	Q02763	Olink	adiposetissue.brain	Adipose.Brain
TF	P02787	MS	liver	Liver
TFPI	P10646	MS	liver.lung.nerve	Liver.Lung.Nerve
TFPI2	P48307	Olink	ovary	Ovary
TFRC	P02786	MS	bonemarrow.heart	Immune.Cardiovascular
TGFBI	Q15582	MS	brain.skin	Brain.Skin
TGFBR2	P37173	Olink	adiposetissue.artery	Adipose.Cardiovascular
THBS1	P07996	MS	lung.spleen	Lung.Immune
TJAP1	Q5JTD0	Olink	artery	Cardiovascular
TMPRSS15	P98073	Olink	spleen	Immune
TNF	P01375	Olink	bonemarrow	Immune
TNFRSF12A	Q9NP84	Olink	pancreas	Pancreas
TNFRSF19	Q9NS68	Olink	skin	Skin
TNXB	P22105	MS	brain.nerve	Brain.Nerve
TP53	P04637	Olink	heart.skin	Cardiovascular.Skin
TPMT	P51580	Olink	liver	Liver
TREML1	Q86YW5	MS	spleen	Immune
TRIAP1	O43715	Olink	muscle	Muscle
TTR	P02766	MS	liver	Liver
TXNDC15	Q96J42	Olink	stomach	Gastrointestinal
UBAC1	Q9BSL1	Olink	muscle	Muscle
USO1	O60763	Olink	pancreas	Pancreas
UXS1	Q8NBZ7	Olink	artery.colon	Cardiovascular.Gastrointestinal
VASN	Q6EMK4	MS	artery	Cardiovascular
VAT1	Q99536	Olink	adrenalgland.nerve	Endocrine.Nerve
VEGFC	P49767	Olink	adiposetissue.liver.muscle	Adipose.Liver.Muscle
VMO1	Q7Z5L0	Olink	liver	Liver
VNN1	O95497	MS	liver	Liver
VNN2	O95498	Olink	spleen	Immune
VPS37A	Q8NEZ2	Olink	heart.muscle	Cardiovascular.Muscle
VPS53	Q5VIR6	Olink	brain	Brain
VTCN1	Q7Z7D3	Olink	pancreas	Pancreas
VTN	P04004	MS	artery.liver.lung	Cardiovascular.Liver.Lung
VWA1	Q6PCB0	Olink	nerve	Nerve
VWF	P04275	MS	lung.nerve	Lung.Nerve
WFDC12	Q8WWY7	Olink	skin	Skin
WFDC2	Q14508	Olink	kidney.thyroid	Kidney and Bladder.Endocrine
WIF1	Q9Y5W5	Olink	lung	Lung
XCL1	P47992	Olink	bonemarrow.spleen	Immune.Immune
XPNPEP2	O43895	Olink	kidney	Kidney and Bladder
YES1	P07947	Olink	brain	Brain
ZBTB16	Q05516	Olink	artery	Cardiovascular

## Sheet: S2
protein	estimate	organ	sex
ADAMTS15	-0.0737328	Adipose	Male
ADIPOQ	0.123696	Adipose	Male
ADM	0.0135163	Adipose	Male
CCL8	0.0271178	Adipose	Male
CLEC3B	-0.217899	Adipose	Male
CLMP	0.0112128	Adipose	Male
COL6A3	-0.0331581	Adipose	Male
FLT1	0.0552254	Adipose	Male
FOXO3	0.0605806	Adipose	Male
GFRA1	0.168405	Adipose	Male
IGF1	-0.102906	Adipose	Male
ITGB1BP1	0.0483894	Adipose	Male
KDR	-0.116534	Adipose	Male
LYVE1	-0.00749963	Adipose	Male
NRP1	0.0749797	Adipose	Male
PDCD1LG2	0.0595142	Adipose	Male
PRDX6	0	Adipose	Male
RSPO3	0.314866	Adipose	Male
SPINK6	0.00109066	Adipose	Male
STAT5B	0.0613618	Adipose	Male
TEK	0	Adipose	Male
TGFBR2	0.222958	Adipose	Male
VEGFC	-0.046375	Adipose	Male
ADAMTS15	-0.0871847	Adipose	Female
ADIPOQ	0	Adipose	Female
ADM	0.0107765	Adipose	Female
CCL8	-0.00903428	Adipose	Female
CLEC3B	-0.287233	Adipose	Female
CLMP	-0.149794	Adipose	Female
COL6A3	0	Adipose	Female
FLT1	0.0808419	Adipose	Female
FOXO3	-0.00817482	Adipose	Female
GFRA1	0.0960117	Adipose	Female
IGF1	-0.0477635	Adipose	Female
ITGB1BP1	0	Adipose	Female
KDR	-0.179784	Adipose	Female
LYVE1	-0.0286526	Adipose	Female
NRP1	0.0777796	Adipose	Female
PDCD1LG2	0.112841	Adipose	Female
PRDX6	0.00718554	Adipose	Female
RSPO3	0.556964	Adipose	Female
SPINK6	0	Adipose	Female
STAT5B	0.0305695	Adipose	Female
TEK	0.053609	Adipose	Female
TGFBR2	0.243269	Adipose	Female
VEGFC	-0.0169567	Adipose	Female
ADCYAP1R1	0.00991399	Brain	Male
AKT3	-0.0228234	Brain	Male
ATP6AP2	0.0254926	Brain	Male
BAIAP2	0.0352027	Brain	Male
CA11	0	Brain	Male
CA14	-0.228998	Brain	Male
CALB1	0.09716	Brain	Male
CALCOCO1	0	Brain	Male
CAMKK1	0	Brain	Male
CD38	-0.037659	Brain	Male
CDC27	0	Brain	Male
CDC37	0	Brain	Male
CHL1	0.0127804	Brain	Male
CIAPIN1	0.0368414	Brain	Male
CNDP1	-0.166319	Brain	Male
CNTN2	0.0260276	Brain	Male
CPE	-0.036876	Brain	Male
CRTAC1	0.0112625	Brain	Male
CST3	0.0704883	Brain	Male
DCTN1	0	Brain	Male
DCTN2	0.00178027	Brain	Male
DDAH1	0.0176938	Brain	Male
DPP6	0.0786567	Brain	Male
DPY30	0.026092	Brain	Male
DTX3	0.152017	Brain	Male
F3	0.0272901	Brain	Male
FGFR2	0.0671403	Brain	Male
GFAP	0.232035	Brain	Male
GFRA2	0	Brain	Male
HGS	0.0151081	Brain	Male
HPGDS	-0.0884623	Brain	Male
ICOSLG	-0.0779561	Brain	Male
IGF1R	0.0115594	Brain	Male
IGSF3	0.158688	Brain	Male
INPP1	0.0664234	Brain	Male
KIFBP	0	Brain	Male
KLK6	-0.090948	Brain	Male
L1CAM	0	Brain	Male
LRIG1	0.0600743	Brain	Male
MAEA	0.0163841	Brain	Male
MMRN1	0	Brain	Male
MOG	0.00507651	Brain	Male
NBL1	0.186893	Brain	Male
NCS1	0.0685112	Brain	Male
NELL1	-0.00590153	Brain	Male
NPTN	0	Brain	Male
OMG	-0.157506	Brain	Male
PLXDC1	-0.00447672	Brain	Male
PODXL2	-0.125922	Brain	Male
PPME1	0	Brain	Male
PROS1	0	Brain	Male
PSRC1	0	Brain	Male
PTGDS	0.0808105	Brain	Male
PVALB	0.0384805	Brain	Male
RET	-0.120392	Brain	Male
RILP	0	Brain	Male
RTBDN	0.0273939	Brain	Male
RTN4R	0	Brain	Male
SCAMP3	0	Brain	Male
SCG2	0.111165	Brain	Male
SEZ6L	0.00748075	Brain	Male
SEZ6L2	0.0705072	Brain	Male
SIRT2	0.0325355	Brain	Male
SLC3A2	0	Brain	Male
SNAP29	0	Brain	Male
SRC	0	Brain	Male
STX6	0	Brain	Male
SUGT1	0.00741661	Brain	Male
TEK	-0.0175547	Brain	Male
TGFBI	-0.0218204	Brain	Male
TNXB	-0.0547023	Brain	Male
VPS53	0	Brain	Male
YES1	-0.000143749	Brain	Male
ADCYAP1R1	0.00413951	Brain	Female
AKT3	0	Brain	Female
ATP6AP2	0	Brain	Female
BAIAP2	0.0786145	Brain	Female
CA11	0.0258483	Brain	Female
CA14	-0.217592	Brain	Female
CALB1	0.107277	Brain	Female
CALCOCO1	-0.0119795	Brain	Female
CAMKK1	-0.0113146	Brain	Female
CD38	0	Brain	Female
CDC27	0	Brain	Female
CDC37	0.00926948	Brain	Female
CHL1	0.0143948	Brain	Female
CIAPIN1	0	Brain	Female
CNDP1	-0.132351	Brain	Female
CNTN2	0.0217076	Brain	Female
CPE	0	Brain	Female
CRTAC1	0.00734454	Brain	Female
CST3	0.0906411	Brain	Female
DCTN1	0	Brain	Female
DCTN2	0.030759	Brain	Female
DDAH1	0.0703743	Brain	Female
DPP6	0	Brain	Female
DPY30	0.0507972	Brain	Female
DTX3	0.175801	Brain	Female
F3	0	Brain	Female
FGFR2	0.00988107	Brain	Female
GFAP	0.331503	Brain	Female
GFRA2	0	Brain	Female
HGS	0	Brain	Female
HPGDS	-0.141446	Brain	Female
ICOSLG	-0.0626312	Brain	Female
IGF1R	0.0435319	Brain	Female
IGSF3	0.118349	Brain	Female
INPP1	0.0742404	Brain	Female
KIFBP	0	Brain	Female
KLK6	-0.0452133	Brain	Female
L1CAM	0.00104926	Brain	Female
LRIG1	-0.00464085	Brain	Female
MAEA	0.0142029	Brain	Female
MMRN1	0	Brain	Female
MOG	0.0469659	Brain	Female
NBL1	0.211932	Brain	Female
NCS1	0	Brain	Female
NELL1	-0.00194476	Brain	Female
NPTN	0.000738412	Brain	Female
OMG	-0.128266	Brain	Female
PLXDC1	-0.0717013	Brain	Female
PODXL2	-0.146529	Brain	Female
PPME1	-0.0085263	Brain	Female
PROS1	0	Brain	Female
PSRC1	-0.0361393	Brain	Female
PTGDS	0.0160391	Brain	Female
PVALB	0.0724327	Brain	Female
RET	-0.129269	Brain	Female
RILP	0	Brain	Female
RTBDN	6.12817e-05	Brain	Female
RTN4R	-0.000143778	Brain	Female
SCAMP3	0	Brain	Female
SCG2	0.122082	Brain	Female
SEZ6L	0	Brain	Female
SEZ6L2	0.0533711	Brain	Female
SIRT2	0.0225604	Brain	Female
SLC3A2	0	Brain	Female
SNAP29	0	Brain	Female
SRC	-0.0149921	Brain	Female
STX6	-0.0133538	Brain	Female
SUGT1	-0.0060828	Brain	Female
TEK	0.0150816	Brain	Female
TGFBI	-0.0850318	Brain	Female
TNXB	-0.0470376	Brain	Female
VPS53	-0.029835	Brain	Female
YES1	0	Brain	Female
A2M	0.178192	Cardiovascular	Male
ABL1	0.0463481	Cardiovascular	Male
ACP6	0	Cardiovascular	Male
ADAMTS8	-0.044517	Cardiovascular	Male
ADAMTSL4	0	Cardiovascular	Male
ALCAM	0	Cardiovascular	Male
AMIGO2	0.021303	Cardiovascular	Male
ANGPT2	0.0924213	Cardiovascular	Male
APOE	-0.0044036	Cardiovascular	Male
ARHGAP1	0	Cardiovascular	Male
BGN	0	Cardiovascular	Male
C1QA	0	Cardiovascular	Male
C1QC	0	Cardiovascular	Male
C4A	0	Cardiovascular	Male
C7	0.0853066	Cardiovascular	Male
CALB1	0.0642891	Cardiovascular	Male
CALCOCO1	0	Cardiovascular	Male
CCDC126	0	Cardiovascular	Male
CCN1	0.00566458	Cardiovascular	Male
CDKN1A	0.00666551	Cardiovascular	Male
CEP85	0	Cardiovascular	Male
CFH	0.013932	Cardiovascular	Male
CIAPIN1	0	Cardiovascular	Male
CLU	-0.00822323	Cardiovascular	Male
CNPY4	0	Cardiovascular	Male
COMP	0	Cardiovascular	Male
COX5B	0	Cardiovascular	Male
CPVL	0	Cardiovascular	Male
CST3	0.0125792	Cardiovascular	Male
CTSF	0.0234169	Cardiovascular	Male
DCBLD2	0.0433248	Cardiovascular	Male
DCTN1	0	Cardiovascular	Male
DLL1	0	Cardiovascular	Male
EDA2R	0.439735	Cardiovascular	Male
EFEMP1	0.0652785	Cardiovascular	Male
EGFL7	-0.0300051	Cardiovascular	Male
ERBB4	0	Cardiovascular	Male
FBLN1	0	Cardiovascular	Male
FLNA	0	Cardiovascular	Male
FLT1	0	Cardiovascular	Male
FN1	0	Cardiovascular	Male
FOXO3	0.023774	Cardiovascular	Male
GSN	-0.102751	Cardiovascular	Male
HSPG2	0	Cardiovascular	Male
IGFBP2	0.0373126	Cardiovascular	Male
IGFBP3	-0.0913995	Cardiovascular	Male
IGHM	0	Cardiovascular	Male
IGHV2-26	0	Cardiovascular	Male
IGHV3-21	0	Cardiovascular	Male
IGHV4-28	0.0354827	Cardiovascular	Male
IGLV6-57	-0.00378951	Cardiovascular	Male
IL13RA1	-0.00113831	Cardiovascular	Male
INPP1	0.043467	Cardiovascular	Male
INPPL1	0	Cardiovascular	Male
ITGAV	-0.105659	Cardiovascular	Male
ITGB5	0	Cardiovascular	Male
LEFTY2	0	Cardiovascular	Male
LGALS3BP	0.00118863	Cardiovascular	Male
LRP1	0.0875728	Cardiovascular	Male
LSM1	0	Cardiovascular	Male
LTBP3	0.057198	Cardiovascular	Male
LUM	0.0193721	Cardiovascular	Male
LYZ	0.0129085	Cardiovascular	Male
MANSC1	-0.0550903	Cardiovascular	Male
MASP2	0	Cardiovascular	Male
MINPP1	0	Cardiovascular	Male
NDUFS6	0	Cardiovascular	Male
NT5E	0	Cardiovascular	Male
PCOLCE	0	Cardiovascular	Male
PDGFC	0	Cardiovascular	Male
PDP1	0	Cardiovascular	Male
PLA2G15	0.030692	Cardiovascular	Male
PLTP	0	Cardiovascular	Male
PLXDC1	0	Cardiovascular	Male
PPP1R12A	-0.00286356	Cardiovascular	Male
PROCR	0	Cardiovascular	Male
PROS1	0	Cardiovascular	Male
PVR	0	Cardiovascular	Male
QSOX1	0	Cardiovascular	Male
RARRES1	0.0361806	Cardiovascular	Male
RARRES2	0.00475303	Cardiovascular	Male
RNF41	0.0188294	Cardiovascular	Male
RUVBL1	0	Cardiovascular	Male
S100A4	0	Cardiovascular	Male
SIAE	0	Cardiovascular	Male
SOD3	0	Cardiovascular	Male
ST3GAL1	0	Cardiovascular	Male
TBL1X	0	Cardiovascular	Male
TFRC	0.00660958	Cardiovascular	Male
TGFBR2	0.0476184	Cardiovascular	Male
TJAP1	0	Cardiovascular	Male
TP53	0	Cardiovascular	Male
UXS1	0	Cardiovascular	Male
VASN	-0.0346793	Cardiovascular	Male
VPS37A	0	Cardiovascular	Male
VTN	0	Cardiovascular	Male
ZBTB16	0.0389606	Cardiovascular	Male
A2M	0.0485277	Cardiovascular	Female
ABL1	0.0214094	Cardiovascular	Female
ACP6	0	Cardiovascular	Female
ADAMTS8	0	Cardiovascular	Female
ADAMTSL4	-0.0691546	Cardiovascular	Female
ALCAM	0	Cardiovascular	Female
AMIGO2	0.027168	Cardiovascular	Female
ANGPT2	0.161646	Cardiovascular	Female
APOE	0	Cardiovascular	Female
ARHGAP1	-0.00548355	Cardiovascular	Female
BGN	0	Cardiovascular	Female
C1QA	-0.0410888	Cardiovascular	Female
C1QC	0	Cardiovascular	Female
C4A	-0.0195479	Cardiovascular	Female
C7	0.192051	Cardiovascular	Female
CALB1	0.0528161	Cardiovascular	Female
CALCOCO1	0	Cardiovascular	Female
CCDC126	-0.00193048	Cardiovascular	Female
CCN1	0.0609943	Cardiovascular	Female
CDKN1A	0	Cardiovascular	Female
CEP85	0.000148685	Cardiovascular	Female
CFH	0	Cardiovascular	Female
CIAPIN1	0	Cardiovascular	Female
CLU	-0.048602	Cardiovascular	Female
CNPY4	0	Cardiovascular	Female
COMP	0	Cardiovascular	Female
COX5B	0	Cardiovascular	Female
CPVL	0	Cardiovascular	Female
CST3	0.0280386	Cardiovascular	Female
CTSF	0.0609534	Cardiovascular	Female
DCBLD2	0.0157583	Cardiovascular	Female
DCTN1	0	Cardiovascular	Female
DLL1	0	Cardiovascular	Female
EDA2R	0.590025	Cardiovascular	Female
EFEMP1	0.043049	Cardiovascular	Female
EGFL7	0	Cardiovascular	Female
ERBB4	0.00232639	Cardiovascular	Female
FBLN1	0	Cardiovascular	Female
FLNA	0	Cardiovascular	Female
FLT1	0.0364648	Cardiovascular	Female
FN1	0	Cardiovascular	Female
FOXO3	0	Cardiovascular	Female
GSN	-0.137661	Cardiovascular	Female
HSPG2	0.00519339	Cardiovascular	Female
IGFBP2	0.015507	Cardiovascular	Female
IGFBP3	-0.129363	Cardiovascular	Female
IGHM	-0.0304193	Cardiovascular	Female
IGHV2-26	0	Cardiovascular	Female
IGHV3-21	0	Cardiovascular	Female
IGHV4-28	0	Cardiovascular	Female
IGLV6-57	0	Cardiovascular	Female
IL13RA1	0	Cardiovascular	Female
INPP1	0.0418479	Cardiovascular	Female
INPPL1	0	Cardiovascular	Female
ITGAV	-0.27305	Cardiovascular	Female
ITGB5	0.0755972	Cardiovascular	Female
LEFTY2	-0.0490463	Cardiovascular	Female
LGALS3BP	0	Cardiovascular	Female
LRP1	0.100844	Cardiovascular	Female
LSM1	-0.00966586	Cardiovascular	Female
LTBP3	0.0200394	Cardiovascular	Female
LUM	0.00788429	Cardiovascular	Female
LYZ	0.0766115	Cardiovascular	Female
MANSC1	-0.0381713	Cardiovascular	Female
MASP2	0	Cardiovascular	Female
MINPP1	0	Cardiovascular	Female
NDUFS6	0	Cardiovascular	Female
NT5E	0	Cardiovascular	Female
PCOLCE	0	Cardiovascular	Female
PDGFC	0	Cardiovascular	Female
PDP1	0	Cardiovascular	Female
PLA2G15	0	Cardiovascular	Female
PLTP	0	Cardiovascular	Female
PLXDC1	-0.0426316	Cardiovascular	Female
PPP1R12A	0	Cardiovascular	Female
PROCR	0	Cardiovascular	Female
PROS1	0	Cardiovascular	Female
PVR	0	Cardiovascular	Female
QSOX1	0.0132122	Cardiovascular	Female
RARRES1	0	Cardiovascular	Female
RARRES2	0	Cardiovascular	Female
RNF41	0	Cardiovascular	Female
RUVBL1	0	Cardiovascular	Female
S100A4	0	Cardiovascular	Female
SIAE	0	Cardiovascular	Female
SOD3	0.0208438	Cardiovascular	Female
ST3GAL1	0.00339624	Cardiovascular	Female
TBL1X	0	Cardiovascular	Female
TFRC	0	Cardiovascular	Female
TGFBR2	0	Cardiovascular	Female
TJAP1	0	Cardiovascular	Female
TP53	0.00421573	Cardiovascular	Female
UXS1	0	Cardiovascular	Female
VASN	-0.0701972	Cardiovascular	Female
VPS37A	-0.00665387	Cardiovascular	Female
VTN	0	Cardiovascular	Female
ZBTB16	0.0311069	Cardiovascular	Female
ADGRG1	0.361524	Endocrine	Male
AKR1B1	-0.0361816	Endocrine	Male
BTD	-0.0704616	Endocrine	Male
CAPG	0.000949517	Endocrine	Male
CBLN4	-0.0514881	Endocrine	Male
CPVL	0	Endocrine	Male
CPXM1	0	Endocrine	Male
DCBLD2	0.113618	Endocrine	Male
GSTA3	0	Endocrine	Male
ICOSLG	0	Endocrine	Male
LPCAT2	0.0175295	Endocrine	Male
MAP3K5	0.0161292	Endocrine	Male
PRTG	0	Endocrine	Male
RSPO3	0.211617	Endocrine	Male
VAT1	0	Endocrine	Male
WFDC2	0.497957	Endocrine	Male
ADGRG1	0.316756	Endocrine	Female
AKR1B1	-0.0489336	Endocrine	Female
BTD	-0.066624	Endocrine	Female
CAPG	0	Endocrine	Female
CBLN4	-0.179686	Endocrine	Female
CPVL	0	Endocrine	Female
CPXM1	0	Endocrine	Female
DCBLD2	0.104325	Endocrine	Female
GSTA3	-0.0982324	Endocrine	Female
ICOSLG	0	Endocrine	Female
LPCAT2	0.0240007	Endocrine	Female
MAP3K5	0.0250147	Endocrine	Female
PRTG	0	Endocrine	Female
RSPO3	0.341585	Endocrine	Female
VAT1	0.0329567	Endocrine	Female
WFDC2	0.46287	Endocrine	Female
ADAMTSL4	0	Gastrointestinal	Male
AGR3	0	Gastrointestinal	Male
ATG4A	0.0236446	Gastrointestinal	Male
CA1	0.0123372	Gastrointestinal	Male
CA12	0.0488137	Gastrointestinal	Male
CA9	0.0274307	Gastrointestinal	Male
CAPG	0.0176143	Gastrointestinal	Male
CDKN1A	0	Gastrointestinal	Male
CEACAM1	-0.00905168	Gastrointestinal	Male
CEACAM5	0.187595	Gastrointestinal	Male
CRISP2	-0.00228108	Gastrointestinal	Male
CRISP3	-0.0193913	Gastrointestinal	Male
CRNN	-0.0689102	Gastrointestinal	Male
DEFB4A_DEFB4B	0.026704	Gastrointestinal	Male
DNAJB1	-0.0130884	Gastrointestinal	Male
DSG2	0	Gastrointestinal	Male
DSG3	-0.0768127	Gastrointestinal	Male
ECM1	-0.00995862	Gastrointestinal	Male
EPHA2	0.219319	Gastrointestinal	Male
FAM3B	0.0699508	Gastrointestinal	Male
FGFBP1	-0.0483803	Gastrointestinal	Male
GALNT7	-0.0239467	Gastrointestinal	Male
GCNT1	0	Gastrointestinal	Male
GPA33	0	Gastrointestinal	Male
HBEGF	-0.173823	Gastrointestinal	Male
IGHA1	0	Gastrointestinal	Male
IGHA2	0	Gastrointestinal	Male
IGHM	0	Gastrointestinal	Male
IGHV1-2	0	Gastrointestinal	Male
IGHV1-46	0.0039281	Gastrointestinal	Male
IGHV2-26	0	Gastrointestinal	Male
IGHV2-5	0	Gastrointestinal	Male
IGHV2-70D	0.00240383	Gastrointestinal	Male
IGHV3-11	0.00279324	Gastrointestinal	Male
IGHV3-15	0	Gastrointestinal	Male
IGHV3-21	0.00609511	Gastrointestinal	Male
IGHV3-23	0	Gastrointestinal	Male
IGHV3-49	0	Gastrointestinal	Male
IGHV3-64	0	Gastrointestinal	Male
IGHV3-7	0	Gastrointestinal	Male
IGHV4-28	0.0467148	Gastrointestinal	Male
IGHV5-10-1	0	Gastrointestinal	Male
IGHV5-51	0.00427414	Gastrointestinal	Male
IGHV6-1	-0.0272919	Gastrointestinal	Male
IGKJ1	0	Gastrointestinal	Male
IGKV1-16	0	Gastrointestinal	Male
IGKV1-17	0	Gastrointestinal	Male
IGKV3-11	0	Gastrointestinal	Male
IGKV3-20	0	Gastrointestinal	Male
IGKV3D-20	-0.012973	Gastrointestinal	Male
IGKV4-1	0	Gastrointestinal	Male
IGKV6-21	0	Gastrointestinal	Male
IGLV2-11	0	Gastrointestinal	Male
IGLV2-14	0	Gastrointestinal	Male
IGLV2-18	0	Gastrointestinal	Male
IGLV2-23	0	Gastrointestinal	Male
IGLV2-8	-0.0311797	Gastrointestinal	Male
IGLV3-19	0	Gastrointestinal	Male
IGLV4-60	0	Gastrointestinal	Male
IGLV7-46	0	Gastrointestinal	Male
IKZF2	0.0260664	Gastrointestinal	Male
IL12A_IL12B	0.0106127	Gastrointestinal	Male
IL6	0.217787	Gastrointestinal	Male
JCHAIN	0.010535	Gastrointestinal	Male
KLK10	0.0967993	Gastrointestinal	Male
KLK12	-0.0261594	Gastrointestinal	Male
KLK13	-0.0454585	Gastrointestinal	Male
LPCAT2	0	Gastrointestinal	Male
LTA4H	0.0695391	Gastrointestinal	Male
LYPD3	-0.0522147	Gastrointestinal	Male
LYPD8	0	Gastrointestinal	Male
LYZ	0.0471936	Gastrointestinal	Male
MAEA	0.00828476	Gastrointestinal	Male
MANSC1	0	Gastrointestinal	Male
MIA	0.0225182	Gastrointestinal	Male
MMP12	0.256706	Gastrointestinal	Male
MMRN1	0	Gastrointestinal	Male
NECTIN4	0	Gastrointestinal	Male
PFKFB2	-0.00349565	Gastrointestinal	Male
PIGR	0.0370705	Gastrointestinal	Male
QSOX1	0.0157722	Gastrointestinal	Male
RBP2	0	Gastrointestinal	Male
RRM2	0	Gastrointestinal	Male
SIAE	0.0125593	Gastrointestinal	Male
SIGLEC6	0	Gastrointestinal	Male
TACSTD2	0.0276315	Gastrointestinal	Male
TXNDC15	0	Gastrointestinal	Male
UXS1	0.0441022	Gastrointestinal	Male
ADAMTSL4	-0.0389476	Gastrointestinal	Female
AGR3	0	Gastrointestinal	Female
ATG4A	-0.0324997	Gastrointestinal	Female
CA1	0.00699122	Gastrointestinal	Female
CA12	0.0130779	Gastrointestinal	Female
CA9	0.0133005	Gastrointestinal	Female
CAPG	0	Gastrointestinal	Female
CDKN1A	0.00619852	Gastrointestinal	Female
CEACAM1	0	Gastrointestinal	Female
CEACAM5	0.175454	Gastrointestinal	Female
CRISP2	0	Gastrointestinal	Female
CRISP3	-0.0680905	Gastrointestinal	Female
CRNN	-0.0423793	Gastrointestinal	Female
DEFB4A_DEFB4B	0.0765294	Gastrointestinal	Female
DNAJB1	0.0153859	Gastrointestinal	Female
DSG2	-0.0224553	Gastrointestinal	Female
DSG3	-0.159263	Gastrointestinal	Female
ECM1	0.0266239	Gastrointestinal	Female
EPHA2	0.281294	Gastrointestinal	Female
FAM3B	0.0729938	Gastrointestinal	Female
FGFBP1	-0.0188103	Gastrointestinal	Female
GALNT7	-0.104334	Gastrointestinal	Female
GCNT1	0.0139146	Gastrointestinal	Female
GPA33	-0.0884143	Gastrointestinal	Female
HBEGF	-0.134655	Gastrointestinal	Female
IGHA1	0.0207721	Gastrointestinal	Female
IGHA2	0	Gastrointestinal	Female
IGHM	-0.0702818	Gastrointestinal	Female
IGHV1-2	-0.00295982	Gastrointestinal	Female
IGHV1-46	-0.011921	Gastrointestinal	Female
IGHV2-26	0.019459	Gastrointestinal	Female
IGHV2-5	0.00502432	Gastrointestinal	Female
IGHV2-70D	-0.0333255	Gastrointestinal	Female
IGHV3-11	0	Gastrointestinal	Female
IGHV3-15	0.00561432	Gastrointestinal	Female
IGHV3-21	0.00580369	Gastrointestinal	Female
IGHV3-23	0	Gastrointestinal	Female
IGHV3-49	-0.0300263	Gastrointestinal	Female
IGHV3-64	-0.0204754	Gastrointestinal	Female
IGHV3-7	0	Gastrointestinal	Female
IGHV4-28	0.0258095	Gastrointestinal	Female
IGHV5-10-1	0.0180346	Gastrointestinal	Female
IGHV5-51	0.0823278	Gastrointestinal	Female
IGHV6-1	-0.0408749	Gastrointestinal	Female
IGKJ1	-0.0209344	Gastrointestinal	Female
IGKV1-16	-0.0391787	Gastrointestinal	Female
IGKV1-17	-0.0319849	Gastrointestinal	Female
IGKV3-11	-0.0173048	Gastrointestinal	Female
IGKV3-20	-0.0486546	Gastrointestinal	Female
IGKV3D-20	-0.0178456	Gastrointestinal	Female
IGKV4-1	-0.0714476	Gastrointestinal	Female
IGKV6-21	0	Gastrointestinal	Female
IGLV2-11	0.0306233	Gastrointestinal	Female
IGLV2-14	-0.0203128	Gastrointestinal	Female
IGLV2-18	0	Gastrointestinal	Female
IGLV2-23	0.00672812	Gastrointestinal	Female
IGLV2-8	-0.002574	Gastrointestinal	Female
IGLV3-19	0.00486773	Gastrointestinal	Female
IGLV4-60	0.0353165	Gastrointestinal	Female
IGLV7-46	-0.024946	Gastrointestinal	Female
IKZF2	-0.0363757	Gastrointestinal	Female
IL12A_IL12B	-0.0297678	Gastrointestinal	Female
IL6	0.181465	Gastrointestinal	Female
JCHAIN	0.0387791	Gastrointestinal	Female
KLK10	0.0718092	Gastrointestinal	Female
KLK12	0.022078	Gastrointestinal	Female
KLK13	-0.01156	Gastrointestinal	Female
LPCAT2	0	Gastrointestinal	Female
LTA4H	0.157575	Gastrointestinal	Female
LYPD3	-0.0425347	Gastrointestinal	Female
LYPD8	-0.0227765	Gastrointestinal	Female
LYZ	0.100059	Gastrointestinal	Female
MAEA	0.0340624	Gastrointestinal	Female
MANSC1	0	Gastrointestinal	Female
MIA	0.0338403	Gastrointestinal	Female
MMP12	0.257397	Gastrointestinal	Female
MMRN1	0	Gastrointestinal	Female
NECTIN4	0.0339779	Gastrointestinal	Female
PFKFB2	0	Gastrointestinal	Female
PIGR	0	Gastrointestinal	Female
QSOX1	0.0523176	Gastrointestinal	Female
RBP2	0.0357634	Gastrointestinal	Female
RRM2	0	Gastrointestinal	Female
SIAE	0	Gastrointestinal	Female
SIGLEC6	0	Gastrointestinal	Female
TACSTD2	0.103162	Gastrointestinal	Female
TXNDC15	0.0437594	Gastrointestinal	Female
UXS1	0.0125373	Gastrointestinal	Female
AIF1	0	Immune	Male
APBB1IP	0	Immune	Male
AREG	0.268395	Immune	Male
ARHGAP25	0	Immune	Male
B2M	0.122199	Immune	Male
C1QA	-0.0153864	Immune	Male
C1QC	0	Immune	Male
CASP8	0.041043	Immune	Male
CD163	0.0560058	Immune	Male
CD1C	-0.126456	Immune	Male
CD27	0.0726854	Immune	Male
CD28	0.0752714	Immune	Male
CD300E	0.00598756	Immune	Male
CD300LF	0	Immune	Male
CD33	-0.00727686	Immune	Male
CD5	0.00695886	Immune	Male
CD5L	0	Immune	Male
CDKN2D	0	Immune	Male
CEACAM3	0	Immune	Male
CFP	-0.0387665	Immune	Male
CLEC6A	0.0303568	Immune	Male
CPXM1	0.0475176	Immune	Male
CREG1	0.0547114	Immune	Male
CRISP2	0	Immune	Male
CSF1R	0	Immune	Male
CXCL8	0.0282012	Immune	Male
DLL1	-0.00766959	Immune	Male
DPEP2	0	Immune	Male
FCGR2B	0.00999364	Immune	Male
FCGR3A	0	Immune	Male
FCGR3B	0	Immune	Male
FEN1	0	Immune	Male
FLT3	-0.0362645	Immune	Male
FLT4	0	Immune	Male
GH2	0	Immune	Male
GP1BA	-0.00466334	Immune	Male
GP5	-0.000384382	Immune	Male
GSAP	0	Immune	Male
HBA2	0	Immune	Male
HBB	0.00449973	Immune	Male
HBD	0	Immune	Male
HBQ1	0	Immune	Male
HMBS	0	Immune	Male
ICAM2	-0.0063937	Immune	Male
IGHG1	0	Immune	Male
IGHG2	-0.0109125	Immune	Male
IGHG4	0	Immune	Male
IGHM	-0.0146917	Immune	Male
IGHV1-46	0.0187331	Immune	Male
IGHV3-35	0	Immune	Male
IGHV3-38	-0.0171883	Immune	Male
IGKV1-8	0	Immune	Male
IGLL1	-0.0232805	Immune	Male
IGLL5	-0.0549845	Immune	Male
IGLV2-23	0	Immune	Male
IGLV3-27	0	Immune	Male
IGLV8-61	0.00576286	Immune	Male
ITGB7	-0.0448358	Immune	Male
KAZALD1	0	Immune	Male
KIR2DL3	0.0371968	Immune	Male
KIR3DL1	0.0291713	Immune	Male
KLK11	0.126379	Immune	Male
LAT2	0.00672617	Immune	Male
LCP1	0	Immune	Male
LPCAT2	0	Immune	Male
LRRC25	0.0247036	Immune	Male
LYN	0	Immune	Male
LYZ	0.0588725	Immune	Male
MMP9	0	Immune	Male
MMRN1	0	Immune	Male
NFKBIE	0	Immune	Male
NINJ1	0.0387657	Immune	Male
NRP1	0.0546595	Immune	Male
NUCB2	0.0587145	Immune	Male
PDCD1	0	Immune	Male
PF4	-0.0186379	Immune	Male
PF4V1	0	Immune	Male
POLR2F	0.00786569	Immune	Male
PPBP	-0.123946	Immune	Male
RASSF2	-0.0196785	Immune	Male
RP2	0.00897304	Immune	Male
RRM2	0	Immune	Male
S100A12	-0.015753	Immune	Male
SELL	-0.11471	Immune	Male
SH2B3	0	Immune	Male
SIGLEC9	0.00658522	Immune	Male
SLAMF6	0.0293288	Immune	Male
SLAMF8	0.0655923	Immune	Male
SPARC	0	Immune	Male
SPTA1	-0.0022685	Immune	Male
STX16	-0.00608849	Immune	Male
TACC3	0	Immune	Male
TFRC	0.0176356	Immune	Male
THBS1	0	Immune	Male
TMPRSS15	-0.0104891	Immune	Male
TNF	-0.00292985	Immune	Male
TREML1	0.000661702	Immune	Male
VNN2	0.0305604	Immune	Male
XCL1	0	Immune	Male
AIF1	-0.0450773	Immune	Female
APBB1IP	0	Immune	Female
AREG	0.202963	Immune	Female
ARHGAP25	0.00696897	Immune	Female
B2M	0.111651	Immune	Female
C1QA	-0.0246136	Immune	Female
C1QC	-0.014023	Immune	Female
CASP8	0.0825871	Immune	Female
CD163	0.0421249	Immune	Female
CD1C	-0.126549	Immune	Female
CD27	0.100582	Immune	Female
CD28	0.0255611	Immune	Female
CD300E	0.0529906	Immune	Female
CD300LF	0.0175769	Immune	Female
CD33	0.00506781	Immune	Female
CD5	0.0117615	Immune	Female
CD5L	0	Immune	Female
CDKN2D	-0.0413235	Immune	Female
CEACAM3	0	Immune	Female
CFP	-0.0698745	Immune	Female
CLEC6A	0.0233356	Immune	Female
CPXM1	0.0149227	Immune	Female
CREG1	0.080828	Immune	Female
CRISP2	-0.0123785	Immune	Female
CSF1R	0.00398035	Immune	Female
CXCL8	0.103952	Immune	Female
DLL1	0.0326974	Immune	Female
DPEP2	0	Immune	Female
FCGR2B	0.0673759	Immune	Female
FCGR3A	-0.00205034	Immune	Female
FCGR3B	-0.037172	Immune	Female
FEN1	0	Immune	Female
FLT3	-0.0254406	Immune	Female
FLT4	-0.0183912	Immune	Female
GH2	0.0276287	Immune	Female
GP1BA	0	Immune	Female
GP5	-0.0752523	Immune	Female
GSAP	-0.0597996	Immune	Female
HBA2	-0.000428634	Immune	Female
HBB	0.0125031	Immune	Female
HBD	0	Immune	Female
HBQ1	0	Immune	Female
HMBS	-0.00906072	Immune	Female
ICAM2	0.0338492	Immune	Female
IGHG1	0	Immune	Female
IGHG2	-0.0846952	Immune	Female
IGHG4	0	Immune	Female
IGHM	-0.0806357	Immune	Female
IGHV1-46	-0.0280001	Immune	Female
IGHV3-35	0	Immune	Female
IGHV3-38	0.0139666	Immune	Female
IGKV1-8	-0.0450135	Immune	Female
IGLL1	0.0254745	Immune	Female
IGLL5	-0.0591862	Immune	Female
IGLV2-23	0.00654937	Immune	Female
IGLV3-27	-0.0319898	Immune	Female
IGLV8-61	-0.0153218	Immune	Female
ITGB7	-0.0749829	Immune	Female
KAZALD1	0.052691	Immune	Female
KIR2DL3	0.00673696	Immune	Female
KIR3DL1	0.0283054	Immune	Female
KLK11	0.0458906	Immune	Female
LAT2	0	Immune	Female
LCP1	-0.0444156	Immune	Female
LPCAT2	-0.000201398	Immune	Female
LRRC25	0	Immune	Female
LYN	0	Immune	Female
LYZ	0.121872	Immune	Female
MMP9	0.0412221	Immune	Female
MMRN1	-0.0027617	Immune	Female
NFKBIE	-0.056157	Immune	Female
NINJ1	0.0629435	Immune	Female
NRP1	0.0522285	Immune	Female
NUCB2	0.00924681	Immune	Female
PDCD1	-0.0183511	Immune	Female
PF4	-0.0348825	Immune	Female
PF4V1	-0.0361365	Immune	Female
POLR2F	0.040903	Immune	Female
PPBP	-0.0893098	Immune	Female
RASSF2	-0.0094517	Immune	Female
RP2	0.0155376	Immune	Female
RRM2	-0.0219572	Immune	Female
S100A12	-0.0464825	Immune	Female
SELL	-0.155701	Immune	Female
SH2B3	0.0294985	Immune	Female
SIGLEC9	0.0142715	Immune	Female
SLAMF6	0.00793898	Immune	Female
SLAMF8	0.0803227	Immune	Female
SPARC	0.00667829	Immune	Female
SPTA1	0	Immune	Female
STX16	-0.0519588	Immune	Female
TACC3	-0.0162916	Immune	Female
TFRC	-0.0455913	Immune	Female
THBS1	0.0276249	Immune	Female
TMPRSS15	-0.0287814	Immune	Female
TNF	0.0439696	Immune	Female
TREML1	0.0225675	Immune	Female
VNN2	0.0579239	Immune	Female
XCL1	0.0386593	Immune	Female
ADGRG1	0.312135	Kidney and Bladder	Male
ANPEP	0	Kidney and Bladder	Male
CALB1	0.0575423	Kidney and Bladder	Male
CD302	0.0709104	Kidney and Bladder	Male
CDC27	0	Kidney and Bladder	Male
DAB2	0.0108118	Kidney and Bladder	Male
FCRLB	0.028115	Kidney and Bladder	Male
FLT1	0.0163671	Kidney and Bladder	Male
GPX3	-0.0388814	Kidney and Bladder	Male
HAVCR1	0.164746	Kidney and Bladder	Male
IGKV1-17	0	Kidney and Bladder	Male
IGLV2-11	0	Kidney and Bladder	Male
LDHB	0.0206173	Kidney and Bladder	Male
MED18	0	Kidney and Bladder	Male
MME	0	Kidney and Bladder	Male
PEPD	0	Kidney and Bladder	Male
POLR2F	0	Kidney and Bladder	Male
PVALB	0	Kidney and Bladder	Male
SLC3A2	0	Kidney and Bladder	Male
WFDC2	0.482067	Kidney and Bladder	Male
XPNPEP2	0	Kidney and Bladder	Male
ADGRG1	0.226211	Kidney and Bladder	Female
ANPEP	-0.0113794	Kidney and Bladder	Female
CALB1	0.0446444	Kidney and Bladder	Female
CD302	0.155724	Kidney and Bladder	Female
CDC27	0	Kidney and Bladder	Female
DAB2	0.00781434	Kidney and Bladder	Female
FCRLB	0.0792497	Kidney and Bladder	Female
FLT1	0.0799324	Kidney and Bladder	Female
GPX3	-0.0855056	Kidney and Bladder	Female
HAVCR1	0.175451	Kidney and Bladder	Female
IGKV1-17	-0.0418848	Kidney and Bladder	Female
IGLV2-11	0	Kidney and Bladder	Female
LDHB	0.0465367	Kidney and Bladder	Female
MED18	-0.0680274	Kidney and Bladder	Female
MME	0	Kidney and Bladder	Female
PEPD	-0.0367763	Kidney and Bladder	Female
POLR2F	0	Kidney and Bladder	Female
PVALB	0.0646837	Kidney and Bladder	Female
SLC3A2	0	Kidney and Bladder	Female
WFDC2	0.462002	Kidney and Bladder	Female
XPNPEP2	-0.0426451	Kidney and Bladder	Female
A1BG	0	Liver	Male
ACAA1	0.0542696	Liver	Male
ACAA2	-0.0249213	Liver	Male
ACP6	0.0357086	Liver	Male
ADGRG6	-0.0139833	Liver	Male
AFM	0.0400155	Liver	Male
AGT	0.0187713	Liver	Male
AHSG	-0.018983	Liver	Male
ALB	-0.0766495	Liver	Male
AMBP	0.0416045	Liver	Male
ANPEP	0.0229297	Liver	Male
APCS	0	Liver	Male
APMAP	0.00150862	Liver	Male
APOA1	-0.00583063	Liver	Male
APOA2	-0.0379093	Liver	Male
APOA4	-0.045191	Liver	Male
APOB	-0.00918655	Liver	Male
APOC1	-0.00369952	Liver	Male
APOC2	-0.00355661	Liver	Male
APOC3	0.0117334	Liver	Male
APOC4	-0.0079398	Liver	Male
APOE	-0.0667092	Liver	Male
APOF	0.0519647	Liver	Male
APOH	0.0291198	Liver	Male
APOL1	-0.0177253	Liver	Male
APOM	-0.0475638	Liver	Male
ARG1	-0.0348094	Liver	Male
ATOX1	0.0943308	Liver	Male
AZGP1	0.0415617	Liver	Male
BCHE	-0.0352463	Liver	Male
C1RL	0.00936158	Liver	Male
C1S	0	Liver	Male
C2	0.0094709	Liver	Male
C3	0.00921672	Liver	Male
C4A	0	Liver	Male
C4BPA	0.0326094	Liver	Male
C4BPB	-0.0363512	Liver	Male
C4B_2	-0.0468848	Liver	Male
C5	0.0465659	Liver	Male
C6	0.0894063	Liver	Male
C8A	-0.00308122	Liver	Male
C8B	-0.00345039	Liver	Male
C8G	-0.0379879	Liver	Male
C9	0.0535219	Liver	Male
CASP8	0.0510704	Liver	Male
CD14	0.0300002	Liver	Male
CD302	0.132446	Liver	Male
CDHR2	0.00754583	Liver	Male
CES2	0.119588	Liver	Male
CES3	0.0376828	Liver	Male
CFB	-0.0801729	Liver	Male
CFH	-0.023904	Liver	Male
CFHR1	-0.0233618	Liver	Male
CFHR2	0	Liver	Male
CFHR3	-0.0369477	Liver	Male
CFHR4	-0.031709	Liver	Male
CFHR5	0	Liver	Male
CFI	0.00593163	Liver	Male
CLU	-0.00598935	Liver	Male
CP	0	Liver	Male
CPB2	0	Liver	Male
CPN1	-0.0194017	Liver	Male
CPN2	-0.068202	Liver	Male
CREG1	0.00431199	Liver	Male
CRP	-0.0443049	Liver	Male
CTSF	0.0759325	Liver	Male
DBH	0.0994786	Liver	Male
DCXR	-0.0512231	Liver	Male
DDX58	-0.00535231	Liver	Male
EPS8L2	0.028646	Liver	Male
ERBIN	0.0409899	Liver	Male
ERP44	-0.0546321	Liver	Male
F10	-0.0407692	Liver	Male
F11	-0.0279845	Liver	Male
F12	0	Liver	Male
F13B	-0.0697449	Liver	Male
F2	-0.0761509	Liver	Male
F5	0	Liver	Male
F7	0.0292897	Liver	Male
F9	-0.0203649	Liver	Male
FCN2	-0.0696576	Liver	Male
FETUB	-0.0443434	Liver	Male
FGA	0.024378	Liver	Male
FGB	0.0204751	Liver	Male
FGF21	0.106954	Liver	Male
FGF23	0.00417782	Liver	Male
FGG	0.0597437	Liver	Male
FURIN	0	Liver	Male
GALNT2	-0.0379752	Liver	Male
GC	-0.0473604	Liver	Male
GFOD2	0	Liver	Male
GGH	-0.024177	Liver	Male
GNE	0.0215761	Liver	Male
GPLD1	-0.00347754	Liver	Male
HABP2	0.0294398	Liver	Male
HAGH	0.023522	Liver	Male
HAO1	-0.0160051	Liver	Male
HGFAC	0.0239308	Liver	Male
HP	-0.0231559	Liver	Male
HPR	-0.0231575	Liver	Male
HPX	0.0615079	Liver	Male
HRG	-0.014444	Liver	Male
HS3ST3B1	0.00308425	Liver	Male
IGF2	-0.0174022	Liver	Male
IGFALS	-0.108902	Liver	Male
IGFBP3	-0.0511781	Liver	Male
IGHV2-5	0.0104121	Liver	Male
IL1RAP	-0.00543559	Liver	Male
INHBC	0.0502255	Liver	Male
IQGAP2	-0.0694616	Liver	Male
ITGB1BP1	0.0156379	Liver	Male
ITIH1	-0.0001963	Liver	Male
ITIH2	0	Liver	Male
ITIH3	0.0456443	Liver	Male
ITIH4	-0.0918932	Liver	Male
KLKB1	-0.0887411	Liver	Male
KNG1	0	Liver	Male
LBP	0	Liver	Male
LCAT	0.00463478	Liver	Male
LPA	0.0272675	Liver	Male
LRG1	0.024696	Liver	Male
MASP1	-0.011407	Liver	Male
MASP2	0.00394526	Liver	Male
MBL2	0.0122228	Liver	Male
MED18	0	Liver	Male
MSRA	-0.0117562	Liver	Male
NAMPT	0	Liver	Male
OGFR	-0.0147777	Liver	Male
ORM1	0.00619462	Liver	Male
ORM2	0.0147174	Liver	Male
PGLYRP2	0	Liver	Male
PLG	-0.0157038	Liver	Male
PON1	-0.0368482	Liver	Male
PON3	-0.0650893	Liver	Male
PRDX6	-0.0328494	Liver	Male
PRG4	0.0160511	Liver	Male
PROC	0	Liver	Male
PROS1	0.0383347	Liver	Male
PROZ	-0.0170904	Liver	Male
PSMA1	0	Liver	Male
PZP	-0.0390803	Liver	Male
RAD23B	0.0315155	Liver	Male
RASSF2	-0.03582	Liver	Male
RBP4	0.0528605	Liver	Male
RBP5	0.0489833	Liver	Male
RTN4R	0.0115003	Liver	Male
SAA1	-0.0357552	Liver	Male
SAA2	-0.000546793	Liver	Male
SAA4	-0.00610923	Liver	Male
SCLY	-0.0383122	Liver	Male
SCP2	0.00402681	Liver	Male
SELENOP	-0.105418	Liver	Male
SERPINA1	0.0424309	Liver	Male
SERPINA10	-0.0366004	Liver	Male
SERPINA3	0.0352909	Liver	Male
SERPINA4	0	Liver	Male
SERPINA6	-0.0501352	Liver	Male
SERPINA7	-0.032314	Liver	Male
SERPINC1	0.00398805	Liver	Male
SERPIND1	-0.0476309	Liver	Male
SERPINF1	-0.0377012	Liver	Male
SERPINF2	-0.122582	Liver	Male
SERPING1	0.0267659	Liver	Male
SHBG	0.11742	Liver	Male
SLC3A2	-0.00906455	Liver	Male
SMAD5	0.0158588	Liver	Male
SMOC1	-0.00157076	Liver	Male
SORD	0.00452282	Liver	Male
SPP2	-0.00190366	Liver	Male
TACC3	-0.014394	Liver	Male
TF	0.0116278	Liver	Male
TFPI	0.0123608	Liver	Male
TPMT	-0.0179217	Liver	Male
TTR	-0.0799468	Liver	Male
VEGFC	-0.0500544	Liver	Male
VMO1	0.0025666	Liver	Male
VNN1	-0.0188873	Liver	Male
VTN	-0.0430249	Liver	Male
A1BG	0	Liver	Female
ACAA1	0	Liver	Female
ACAA2	-0.00481291	Liver	Female
ACP6	0.00287633	Liver	Female
ADGRG6	0	Liver	Female
AFM	0.0546284	Liver	Female
AGT	0	Liver	Female
AHSG	-0.0181934	Liver	Female
ALB	-0.149907	Liver	Female
AMBP	0.00820769	Liver	Female
ANPEP	-0.0158895	Liver	Female
APCS	0.0311938	Liver	Female
APMAP	0	Liver	Female
APOA1	0	Liver	Female
APOA2	-0.0471312	Liver	Female
APOA4	0.0182774	Liver	Female
APOB	0	Liver	Female
APOC1	-0.0179928	Liver	Female
APOC2	0	Liver	Female
APOC3	0.0182017	Liver	Female
APOC4	-0.00408436	Liver	Female
APOE	0	Liver	Female
APOF	0	Liver	Female
APOH	0.038127	Liver	Female
APOL1	-0.0326629	Liver	Female
APOM	0	Liver	Female
ARG1	0	Liver	Female
ATOX1	0.111746	Liver	Female
AZGP1	0.0432021	Liver	Female
BCHE	-0.00248695	Liver	Female
C1RL	-0.0137262	Liver	Female
C1S	-0.0346455	Liver	Female
C2	0	Liver	Female
C3	0	Liver	Female
C4A	-0.0615217	Liver	Female
C4BPA	0	Liver	Female
C4BPB	0	Liver	Female
C4B_2	-0.0131936	Liver	Female
C5	0.0459254	Liver	Female
C6	0	Liver	Female
C8A	0	Liver	Female
C8B	0	Liver	Female
C8G	0.00796243	Liver	Female
C9	0.012806	Liver	Female
CASP8	0.0664484	Liver	Female
CD14	0.0479029	Liver	Female
CD302	0.15532	Liver	Female
CDHR2	0.117396	Liver	Female
CES2	0.0501152	Liver	Female
CES3	-0.00886297	Liver	Female
CFB	-0.0613881	Liver	Female
CFH	0	Liver	Female
CFHR1	0	Liver	Female
CFHR2	0	Liver	Female
CFHR3	0.00383754	Liver	Female
CFHR4	-0.0125996	Liver	Female
CFHR5	0.00297087	Liver	Female
CFI	-0.0977078	Liver	Female
CLU	-0.00387509	Liver	Female
CP	0.0526603	Liver	Female
CPB2	0	Liver	Female
CPN1	-0.0493935	Liver	Female
CPN2	-0.00924032	Liver	Female
CREG1	0.0237901	Liver	Female
CRP	-0.00827806	Liver	Female
CTSF	0.153768	Liver	Female
DBH	0	Liver	Female
DCXR	-0.0135089	Liver	Female
DDX58	0	Liver	Female
EPS8L2	0.0328114	Liver	Female
ERBIN	0	Liver	Female
ERP44	-0.00684042	Liver	Female
F10	-0.0808559	Liver	Female
F11	-0.0101291	Liver	Female
F12	0	Liver	Female
F13B	-0.0371036	Liver	Female
F2	-0.0292735	Liver	Female
F5	0	Liver	Female
F7	0.011958	Liver	Female
F9	0.0694833	Liver	Female
FCN2	-0.013591	Liver	Female
FETUB	-0.000907952	Liver	Female
FGA	-0.0160267	Liver	Female
FGB	0.00567609	Liver	Female
FGF21	0.0880881	Liver	Female
FGF23	0.0843481	Liver	Female
FGG	0.0130724	Liver	Female
FURIN	0.00892536	Liver	Female
GALNT2	-0.0681942	Liver	Female
GC	-0.0337352	Liver	Female
GFOD2	0	Liver	Female
GGH	-0.00605312	Liver	Female
GNE	0	Liver	Female
GPLD1	-0.0420589	Liver	Female
HABP2	0	Liver	Female
HAGH	0	Liver	Female
HAO1	-0.0315103	Liver	Female
HGFAC	0	Liver	Female
HP	0	Liver	Female
HPR	-0.0418176	Liver	Female
HPX	0.0734144	Liver	Female
HRG	0	Liver	Female
HS3ST3B1	0	Liver	Female
IGF2	-0.0115264	Liver	Female
IGFALS	-0.0715629	Liver	Female
IGFBP3	-0.0528952	Liver	Female
IGHV2-5	-0.0126675	Liver	Female
IL1RAP	0.000434359	Liver	Female
INHBC	0.0325222	Liver	Female
IQGAP2	-0.0355642	Liver	Female
ITGB1BP1	0	Liver	Female
ITIH1	0	Liver	Female
ITIH2	0	Liver	Female
ITIH3	0.0870719	Liver	Female
ITIH4	0	Liver	Female
KLKB1	-0.06232	Liver	Female
KNG1	-0.061541	Liver	Female
LBP	-0.0269916	Liver	Female
LCAT	0	Liver	Female
LPA	-0.0177456	Liver	Female
LRG1	0.0375531	Liver	Female
MASP1	0.0425351	Liver	Female
MASP2	0.000876968	Liver	Female
MBL2	0.0182027	Liver	Female
MED18	-0.0482148	Liver	Female
MSRA	-0.101826	Liver	Female
NAMPT	0	Liver	Female
OGFR	-0.00889299	Liver	Female
ORM1	0	Liver	Female
ORM2	0	Liver	Female
PGLYRP2	0.00816376	Liver	Female
PLG	-0.00528804	Liver	Female
PON1	-0.0371358	Liver	Female
PON3	-0.0664777	Liver	Female
PRDX6	0	Liver	Female
PRG4	0	Liver	Female
PROC	0	Liver	Female
PROS1	0	Liver	Female
PROZ	0.0232082	Liver	Female
PSMA1	0	Liver	Female
PZP	-0.0457181	Liver	Female
RAD23B	0	Liver	Female
RASSF2	0	Liver	Female
RBP4	0.0324703	Liver	Female
RBP5	0.0253958	Liver	Female
RTN4R	0	Liver	Female
SAA1	-0.00588666	Liver	Female
SAA2	-0.000588782	Liver	Female
SAA4	0.0241211	Liver	Female
SCLY	-0.0827221	Liver	Female
SCP2	0	Liver	Female
SELENOP	-0.0680596	Liver	Female
SERPINA1	0.0841817	Liver	Female
SERPINA10	-0.0159844	Liver	Female
SERPINA3	0.0619685	Liver	Female
SERPINA4	0	Liver	Female
SERPINA6	-0.0837443	Liver	Female
SERPINA7	0	Liver	Female
SERPINC1	0.0104514	Liver	Female
SERPIND1	-0.0421567	Liver	Female
SERPINF1	0	Liver	Female
SERPINF2	-0.0625932	Liver	Female
SERPING1	0.018646	Liver	Female
SHBG	0.0168584	Liver	Female
SLC3A2	0	Liver	Female
SMAD5	0	Liver	Female
SMOC1	-0.0318654	Liver	Female
SORD	0	Liver	Female
SPP2	0.0269209	Liver	Female
TACC3	-0.00676213	Liver	Female
TF	0.014259	Liver	Female
TFPI	-0.0162807	Liver	Female
TPMT	-0.0145694	Liver	Female
TTR	-0.0843902	Liver	Female
VEGFC	-0.0233217	Liver	Female
VMO1	0.0192843	Liver	Female
VNN1	0	Liver	Female
VTN	-0.0478536	Liver	Female
ADIPOQ	0.0748619	Lung	Male
ALPP	0.12276	Lung	Male
APOE	-0.0634447	Lung	Male
CD14	0.0174835	Lung	Male
CDH5	0	Lung	Male
CLU	-0.0908023	Lung	Male
COL6A3	-0.0253427	Lung	Male
FCN3	-0.0995589	Lung	Male
FOLR1	0.136681	Lung	Male
FOLR3	0.0515081	Lung	Male
GFRA1	0.306901	Lung	Male
GP1BA	-0.0342173	Lung	Male
HBQ1	0	Lung	Male
ICAM1	0.0166425	Lung	Male
IGHV3-35	0	Lung	Male
MINPP1	0	Lung	Male
MSLN	0.0927762	Lung	Male
PODXL	0	Lung	Male
RBP2	0.0959543	Lung	Male
SFTPA1	0	Lung	Male
SFTPA2	0.0306966	Lung	Male
SIGLEC6	0.0367595	Lung	Male
TFPI	0	Lung	Male
THBS1	-0.0156008	Lung	Male
VTN	-0.0540277	Lung	Male
VWF	0.152167	Lung	Male
WIF1	0	Lung	Male
ADIPOQ	0	Lung	Female
ALPP	0.116971	Lung	Female
APOE	0	Lung	Female
CD14	0.0526878	Lung	Female
CDH5	-0.0579127	Lung	Female
CLU	-0.136611	Lung	Female
COL6A3	0	Lung	Female
FCN3	-0.0882458	Lung	Female
FOLR1	0.157009	Lung	Female
FOLR3	0.0350061	Lung	Female
GFRA1	0.348078	Lung	Female
GP1BA	-0.000787053	Lung	Female
HBQ1	0	Lung	Female
ICAM1	0.00917912	Lung	Female
IGHV3-35	-0.0690164	Lung	Female
MINPP1	0	Lung	Female
MSLN	0.112899	Lung	Female
PODXL	0	Lung	Female
RBP2	0.122679	Lung	Female
SFTPA1	0	Lung	Female
SFTPA2	0.0215006	Lung	Female
SIGLEC6	0	Lung	Female
TFPI	-0.0204622	Lung	Female
THBS1	0	Lung	Female
VTN	-0.0749801	Lung	Female
VWF	0.189469	Lung	Female
WIF1	-0.069515	Lung	Female
AARSD1	0.023886	Muscle	Male
CA12	0.0613399	Muscle	Male
CDC37	0.00715979	Muscle	Male
CDNF	0.0341724	Muscle	Male
CHAC2	-0.0129633	Muscle	Male
CTSF	0.0279945	Muscle	Male
DRG2	-0.00628215	Muscle	Male
ERBB4	0.0232096	Muscle	Male
FLT4	0.016878	Muscle	Male
FOXO3	0.0204539	Muscle	Male
GCNT1	0.0385352	Muscle	Male
GPC1	-0.0287927	Muscle	Male
HSPB6	0.106179	Muscle	Male
IGHV3-64	0.00565982	Muscle	Male
IGKV1-8	-0.0106025	Muscle	Male
IGLV3-27	0.0162669	Muscle	Male
IGLV4-69	-0.0150823	Muscle	Male
MAVS	-0.0165937	Muscle	Male
MED18	-0.0227059	Muscle	Male
METAP2	-0.0123693	Muscle	Male
OPTN	0.0314256	Muscle	Male
PRDX6	-0.0130554	Muscle	Male
PRKRA	-0.0122781	Muscle	Male
RAD23B	0.0239985	Muscle	Male
RRM2B	0.0412313	Muscle	Male
SEMA4C	0.0707448	Muscle	Male
SIRT2	0.0246811	Muscle	Male
STXBP3	0.0115591	Muscle	Male
TRIAP1	0.0723286	Muscle	Male
UBAC1	0.0132078	Muscle	Male
VEGFC	-0.0334354	Muscle	Male
VPS37A	0.0127255	Muscle	Male
AARSD1	0.0840534	Muscle	Female
CA12	0.0304459	Muscle	Female
CDC37	0	Muscle	Female
CDNF	0	Muscle	Female
CHAC2	-0.0231353	Muscle	Female
CTSF	0.129218	Muscle	Female
DRG2	0	Muscle	Female
ERBB4	0.0465591	Muscle	Female
FLT4	0	Muscle	Female
FOXO3	-0.0197121	Muscle	Female
GCNT1	0.126092	Muscle	Female
GPC1	-0.133771	Muscle	Female
HSPB6	0.532454	Muscle	Female
IGHV3-64	-0.0592848	Muscle	Female
IGKV1-8	-0.059847	Muscle	Female
IGLV3-27	-0.0445003	Muscle	Female
IGLV4-69	-0.0578821	Muscle	Female
MAVS	0.0367624	Muscle	Female
MED18	-0.0660055	Muscle	Female
METAP2	-0.00853936	Muscle	Female
OPTN	0	Muscle	Female
PRDX6	-0.117452	Muscle	Female
PRKRA	0.00601448	Muscle	Female
RAD23B	0	Muscle	Female
RRM2B	0.0182519	Muscle	Female
SEMA4C	0.251956	Muscle	Female
SIRT2	0.05214	Muscle	Female
STXBP3	0.0212661	Muscle	Female
TRIAP1	0.200182	Muscle	Female
UBAC1	0	Muscle	Female
VEGFC	-0.0296512	Muscle	Female
VPS37A	0	Muscle	Female
A2M	0.405713	Nerve	Male
ADAMTSL4	-0.021016	Nerve	Male
ADIPOQ	0.0744802	Nerve	Male
AGT	0	Nerve	Male
APOD	0	Nerve	Male
ATRN	0	Nerve	Male
AZGP1	0	Nerve	Male
C1RL	0	Nerve	Male
CD14	0	Nerve	Male
CD44	0	Nerve	Male
CFD	0.215815	Nerve	Male
CFI	0.0237727	Nerve	Male
CHL1	0	Nerve	Male
COL6A3	-0.00392315	Nerve	Male
ENTPD2	0	Nerve	Male
ERBB2	0	Nerve	Male
F10	-0.0800096	Nerve	Male
GFRA1	0.258726	Nerve	Male
HS6ST1	0	Nerve	Male
IGHA1	0	Nerve	Male
IGHG1	0	Nerve	Male
IGHG2	0	Nerve	Male
IGHG4	0	Nerve	Male
IGHV1-2	0.00440436	Nerve	Male
IGHV1-24	0	Nerve	Male
IGHV1-46	0	Nerve	Male
IGHV2-5	0	Nerve	Male
IGHV2-70D	0	Nerve	Male
IGHV3-15	0	Nerve	Male
IGHV3-21	0	Nerve	Male
IGHV3-23	0.0162584	Nerve	Male
IGHV3-35	-0.0122945	Nerve	Male
IGHV3-38	-0.0136063	Nerve	Male
IGHV3-49	0	Nerve	Male
IGHV3-7	0	Nerve	Male
IGHV4-28	0.0366564	Nerve	Male
IGHV5-51	0	Nerve	Male
IGHV6-1	-0.0593112	Nerve	Male
IGKV1-16	0	Nerve	Male
IGKV1-5	0	Nerve	Male
IGKV3-11	0	Nerve	Male
IGKV3D-20	-0.0164599	Nerve	Male
IGKV4-1	0	Nerve	Male
IGKV6-21	0	Nerve	Male
IGLL1	-0.0145182	Nerve	Male
IGLL5	-0.0220248	Nerve	Male
IGLV1-40	0	Nerve	Male
IGLV1-47	0.0146198	Nerve	Male
IGLV1-51	0.00307479	Nerve	Male
IGLV2-11	0	Nerve	Male
IGLV2-14	0	Nerve	Male
IGLV2-18	0	Nerve	Male
IGLV3-10	0.0449862	Nerve	Male
IGLV3-19	0	Nerve	Male
IGLV3-9	0	Nerve	Male
IGLV7-46	0	Nerve	Male
IGLV8-61	0.0137901	Nerve	Male
L1CAM	0	Nerve	Male
LRG1	0.113203	Nerve	Male
LUM	0.0552877	Nerve	Male
LYVE1	0	Nerve	Male
MIA	0	Nerve	Male
NRP1	0	Nerve	Male
PI16	-0.0371272	Nerve	Male
PLXDC1	0	Nerve	Male
PLXDC2	0	Nerve	Male
PROCR	-0.00356751	Nerve	Male
RUVBL1	0.00474794	Nerve	Male
SEMA4C	0.124962	Nerve	Male
SLITRK2	-0.0384546	Nerve	Male
SORCS2	0	Nerve	Male
TAFA5	0	Nerve	Male
TFPI	0	Nerve	Male
TNXB	-0.0625439	Nerve	Male
VAT1	0	Nerve	Male
VWA1	0.0781279	Nerve	Male
VWF	0.0547212	Nerve	Male
A2M	0.227832	Nerve	Female
ADAMTSL4	-0.0996767	Nerve	Female
ADIPOQ	-0.0179658	Nerve	Female
AGT	0	Nerve	Female
APOD	0	Nerve	Female
ATRN	0	Nerve	Female
AZGP1	0.0426568	Nerve	Female
C1RL	-0.0331978	Nerve	Female
CD14	0.0265697	Nerve	Female
CD44	0	Nerve	Female
CFD	0.20786	Nerve	Female
CFI	-0.00475348	Nerve	Female
CHL1	0	Nerve	Female
COL6A3	0	Nerve	Female
ENTPD2	-0.0390222	Nerve	Female
ERBB2	0.0786656	Nerve	Female
F10	-0.127602	Nerve	Female
GFRA1	0.222298	Nerve	Female
HS6ST1	0	Nerve	Female
IGHA1	0.0129785	Nerve	Female
IGHG1	-0.0246822	Nerve	Female
IGHG2	-0.0642854	Nerve	Female
IGHG4	0	Nerve	Female
IGHV1-2	0	Nerve	Female
IGHV1-24	0	Nerve	Female
IGHV1-46	-0.0234673	Nerve	Female
IGHV2-5	0	Nerve	Female
IGHV2-70D	-0.0343864	Nerve	Female
IGHV3-15	0	Nerve	Female
IGHV3-21	0.0201935	Nerve	Female
IGHV3-23	0.0113085	Nerve	Female
IGHV3-35	0	Nerve	Female
IGHV3-38	0.0238664	Nerve	Female
IGHV3-49	-0.0260385	Nerve	Female
IGHV3-7	0.0151711	Nerve	Female
IGHV4-28	0	Nerve	Female
IGHV5-51	0.0958763	Nerve	Female
IGHV6-1	-0.0612999	Nerve	Female
IGKV1-16	-0.0403156	Nerve	Female
IGKV1-5	-0.0152835	Nerve	Female
IGKV3-11	-0.0290472	Nerve	Female
IGKV3D-20	-0.0132091	Nerve	Female
IGKV4-1	-0.0637754	Nerve	Female
IGKV6-21	0	Nerve	Female
IGLL1	0	Nerve	Female
IGLL5	-0.0407355	Nerve	Female
IGLV1-40	0	Nerve	Female
IGLV1-47	0	Nerve	Female
IGLV1-51	0	Nerve	Female
IGLV2-11	0.0134665	Nerve	Female
IGLV2-14	-0.0128931	Nerve	Female
IGLV2-18	0	Nerve	Female
IGLV3-10	0	Nerve	Female
IGLV3-19	0	Nerve	Female
IGLV3-9	0.00539293	Nerve	Female
IGLV7-46	-0.0315089	Nerve	Female
IGLV8-61	0	Nerve	Female
L1CAM	0	Nerve	Female
LRG1	0.170806	Nerve	Female
LUM	0.13042	Nerve	Female
LYVE1	-0.0201738	Nerve	Female
MIA	0.0365842	Nerve	Female
NRP1	0.00451098	Nerve	Female
PI16	-0.0364873	Nerve	Female
PLXDC1	-0.0935959	Nerve	Female
PLXDC2	0.00367283	Nerve	Female
PROCR	0	Nerve	Female
RUVBL1	0	Nerve	Female
SEMA4C	0.220169	Nerve	Female
SLITRK2	-0.178232	Nerve	Female
SORCS2	0.129509	Nerve	Female
TAFA5	0	Nerve	Female
TFPI	-0.0220079	Nerve	Female
TNXB	-0.0364527	Nerve	Female
VAT1	0	Nerve	Female
VWA1	0.0884216	Nerve	Female
VWF	0.110369	Nerve	Female
ANKRD54	0	Ovary	Male
APEX1	0.01895	Ovary	Male
C7	0.254672	Ovary	Male
CCN4	0.0249501	Ovary	Male
CPXM1	0.00378263	Ovary	Male
FUS	0	Ovary	Male
FXN	0.0760072	Ovary	Male
GALNT10	0.0240227	Ovary	Male
IGLV1-36	-0.00789992	Ovary	Male
IGLV7-46	-0.00813725	Ovary	Male
LAG3	0.0885746	Ovary	Male
MDK	0.159216	Ovary	Male
NBL1	0.343043	Ovary	Male
PQBP1	-0.0424322	Ovary	Male
SLAMF8	0.0986105	Ovary	Male
STAT5B	0.0473203	Ovary	Male
TBL1X	0	Ovary	Male
TFPI2	0.072838	Ovary	Male
ANKRD54	0	Ovary	Female
APEX1	0.0159356	Ovary	Female
C7	0.258254	Ovary	Female
CCN4	0	Ovary	Female
CPXM1	0	Ovary	Female
FUS	0.0286945	Ovary	Female
FXN	0.0609099	Ovary	Female
GALNT10	0.0873912	Ovary	Female
IGLV1-36	-0.0866385	Ovary	Female
IGLV7-46	-0.0836179	Ovary	Female
LAG3	0.0695841	Ovary	Female
MDK	0.0879059	Ovary	Female
NBL1	0.389562	Ovary	Female
PQBP1	-0.0327833	Ovary	Female
SLAMF8	0.115157	Ovary	Female
STAT5B	0.0132923	Ovary	Female
TBL1X	0	Ovary	Female
TFPI2	0.119706	Ovary	Female
ANKRD54	-0.0465914	Pancreas	Male
ANPEP	0	Pancreas	Male
CFC1	0.113676	Pancreas	Male
CRH	-0.117087	Pancreas	Male
DKKL1	0.0634851	Pancreas	Male
ELOA	0.0197762	Pancreas	Male
FAM3B	0.14212	Pancreas	Male
GCG	-0.0980314	Pancreas	Male
IDUA	0.0697379	Pancreas	Male
KLK1	0.0975178	Pancreas	Male
KRT18	0.0714284	Pancreas	Male
LHB	0.038434	Pancreas	Male
P4HB	-0.0558838	Pancreas	Male
PLTP	-0.0357771	Pancreas	Male
PPY	0.267477	Pancreas	Male
SRC	-0.183796	Pancreas	Male
STAT5B	0.0346189	Pancreas	Male
STX16	-0.016895	Pancreas	Male
STX4	0.193235	Pancreas	Male
TBC1D23	-0.0529257	Pancreas	Male
TNFRSF12A	0.247963	Pancreas	Male
USO1	0	Pancreas	Male
VTCN1	0.0722232	Pancreas	Male
ANKRD54	0	Pancreas	Female
ANPEP	-0.0646332	Pancreas	Female
CFC1	0.0458463	Pancreas	Female
CRH	-0.0855915	Pancreas	Female
DKKL1	0.0258003	Pancreas	Female
ELOA	0.011053	Pancreas	Female
FAM3B	0.0654872	Pancreas	Female
GCG	-0.0745791	Pancreas	Female
IDUA	-0.0144323	Pancreas	Female
KLK1	0.0730115	Pancreas	Female
KRT18	0.101248	Pancreas	Female
LHB	0.129819	Pancreas	Female
P4HB	0	Pancreas	Female
PLTP	-0.0119418	Pancreas	Female
PPY	0.28848	Pancreas	Female
SRC	-0.186345	Pancreas	Female
STAT5B	0.00373878	Pancreas	Female
STX16	-0.0527964	Pancreas	Female
STX4	0.163891	Pancreas	Female
TBC1D23	0	Pancreas	Female
TNFRSF12A	0.361253	Pancreas	Female
USO1	-0.000847875	Pancreas	Female
VTCN1	0.0694023	Pancreas	Female
APOC4	-0.07355	Prostate	Male
AZGP1	-0.0732392	Prostate	Male
CD38	0.0533069	Prostate	Male
IGHV3-15	0.0581716	Prostate	Male
IGHV5-10-1	-0.00133942	Prostate	Male
IGKV1-8	-0.051553	Prostate	Male
IGKV6-21	-0.0291425	Prostate	Male
KLK11	0.222375	Prostate	Male
KLK4	0.483329	Prostate	Male
NPY	-0.0465437	Prostate	Male
PPP1R12A	-0.0927072	Prostate	Male
STX4	0.0736392	Prostate	Male
APOC4	-0.0733667	Prostate	Female
AZGP1	0	Prostate	Female
CD38	0.208673	Prostate	Female
IGHV3-15	0	Prostate	Female
IGHV5-10-1	0.0104195	Prostate	Female
IGKV1-8	-0.0791849	Prostate	Female
IGKV6-21	-0.0258939	Prostate	Female
KLK11	0.140996	Prostate	Female
KLK4	0.438468	Prostate	Female
NPY	-0.0428171	Prostate	Female
PPP1R12A	-0.178199	Prostate	Female
STX4	0.124937	Prostate	Female
BTC	0.0219494	Skin	Male
CA12	0.0649292	Skin	Male
CD207	0	Skin	Male
CD44	0	Skin	Male
CRISP2	-0.0316978	Skin	Male
CTSV	-0.0731675	Skin	Male
DSG4	-0.176425	Skin	Male
ERBB2	-0.0586792	Skin	Male
FGFR2	0.0500657	Skin	Male
HPGDS	-0.212185	Skin	Male
IGSF3	0.243744	Skin	Male
KLK14	0.152942	Skin	Male
KLK8	-0.150853	Skin	Male
LGALS7_LGALS7B	0.0085022	Skin	Male
MUC16	0.0802096	Skin	Male
NECTIN4	0.162332	Skin	Male
NTF4	0	Skin	Male
OPTC	0.0440126	Skin	Male
RTN4R	0	Skin	Male
SEMA4C	0.154536	Skin	Male
SERPINA9	0.0705881	Skin	Male
SIGLEC6	-0.0067654	Skin	Male
TACC3	0	Skin	Male
TGFBI	-0.0447382	Skin	Male
TNFRSF19	0.289423	Skin	Male
TP53	0.00931543	Skin	Male
WFDC12	0.06931	Skin	Male
BTC	-0.000768087	Skin	Female
CA12	0.0480149	Skin	Female
CD207	0	Skin	Female
CD44	0	Skin	Female
CRISP2	-0.034162	Skin	Female
CTSV	-0.206816	Skin	Female
DSG4	-0.20121	Skin	Female
ERBB2	0.101294	Skin	Female
FGFR2	0.019184	Skin	Female
HPGDS	-0.20095	Skin	Female
IGSF3	0.133142	Skin	Female
KLK14	0.00082934	Skin	Female
KLK8	-0.287355	Skin	Female
LGALS7_LGALS7B	0.0860044	Skin	Female
MUC16	0.0785055	Skin	Female
NECTIN4	0.316768	Skin	Female
NTF4	0	Skin	Female
OPTC	0.0214908	Skin	Female
RTN4R	-0.0615525	Skin	Female
SEMA4C	0.21764	Skin	Female
SERPINA9	0.0809008	Skin	Female
SIGLEC6	-0.0165714	Skin	Female
TACC3	0	Skin	Female
TGFBI	-0.10845	Skin	Female
TNFRSF19	0.235018	Skin	Female
TP53	0.0402218	Skin	Female
WFDC12	0.0801707	Skin	Female
