# Supplementary material
Source: Research Square preprint supplement (doi:10.21203/rs.3.rs-9173304/v1)
Supplement: Supplementary file 2 [file 930e564d9c257c42b8f03b0e.xlsx]

## Sheet: README
	Sheet	Description
	S1	Performance and age correlation for each of the organ clocks
	S2	Number of years that each organ age equates to per 1 SD
	Sheet	Column description
	S1	clock: Aging clock name
		sex: Determines which sex-stratified clock it is (male/female)
		metric: Whether the row represents age correlation or C-index (concordance)
		estimate: Depending on 'metric' either pearson correlation between organ age and chronological age, or C-index of the clock
	S2	clock: Aging clock name
		sd: SD in mortality units (output from mortality clock)
		loess_slope_at_median_age: Slope used to estimate the approximate amount of years each SD represents
		years_per_sd: Approximated number of chronological years that each SD increase equals for the given clock

## Sheet: S1
clock	sex	metric	estimate
Adipose	female	concordance	0.7201513414749761
Adipose	female	age_correlation	0.5477078572627367
Adipose	male	concordance	0.6998384252362126
Adipose	male	age_correlation	0.541697593273905
Brain	female	concordance	0.7498718423842315
Brain	female	age_correlation	0.666415330576208
Brain	male	concordance	0.7508277111134475
Brain	male	age_correlation	0.6696220721608072
Cardiovascular	female	concordance	0.7738268881055599
Cardiovascular	female	age_correlation	0.6497213806277448
Cardiovascular	male	concordance	0.7570352964981224
Cardiovascular	male	age_correlation	0.6825771121789768
Endocrine	female	concordance	0.7534919718346276
Endocrine	female	age_correlation	0.571448995111223
Endocrine	male	concordance	0.7506640534337365
Endocrine	male	age_correlation	0.63431855937296
Gastrointestinal	female	concordance	0.7561719914848875
Gastrointestinal	female	age_correlation	0.5413370770795707
Gastrointestinal	male	concordance	0.7348214941053479
Gastrointestinal	male	age_correlation	0.5970255613608745
Immune	female	concordance	0.7307714450697671
Immune	female	age_correlation	0.48871117730184654
Immune	male	concordance	0.7215766284930996
Immune	male	age_correlation	0.5413584993126805
Kidney and Bladder	female	concordance	0.7591746890863491
Kidney and Bladder	female	age_correlation	0.5537937278227252
Kidney and Bladder	male	concordance	0.7531789264452957
Kidney and Bladder	male	age_correlation	0.6164339799625984
Liver	female	concordance	0.7535616095976005
Liver	female	age_correlation	0.6256705091714315
Liver	male	concordance	0.749451002874424
Liver	male	age_correlation	0.6515843259877434
Lung	female	concordance	0.6990117987744443
Lung	female	age_correlation	0.4107499306383613
Lung	male	concordance	0.7019729181255343
Lung	male	age_correlation	0.478637951147978
Muscle	female	concordance	0.7201523756991787
Muscle	female	age_correlation	0.588053263844231
Muscle	male	concordance	0.6772288688179551
Muscle	male	age_correlation	0.43827574283831766
Nerve	female	concordance	0.7366544570753863
Nerve	female	age_correlation	0.5706746790382742
Nerve	male	concordance	0.727269436085229
Nerve	male	age_correlation	0.6088391702918932
Ovary	female	concordance	0.7017128476501564
Ovary	female	age_correlation	0.4455790730379941
Ovary	male	concordance	0.703666527144362
Ovary	male	age_correlation	0.48383628381375715
Pancreas	female	concordance	0.6846871040860475
Pancreas	female	age_correlation	0.43467142180949797
Pancreas	male	concordance	0.6692473333716854
Pancreas	male	age_correlation	0.4303099441336644
Prostate	female	concordance	0.6717917072456023
Prostate	female	age_correlation	0.42451849464989777
Prostate	male	concordance	0.7035936250870362
Prostate	male	age_correlation	0.6071050781908723
Skin	female	concordance	0.716901809030501
Skin	female	age_correlation	0.549080619581493
Skin	male	concordance	0.6892591960738027
Skin	male	age_correlation	0.5085923318736739

## Sheet: S2
clock	sd	loess_slope_at_median_age	years_per_sd
Adipose	0.635	0.0437	14.53
Brain	0.651	0.0804	8.09
Cardiovascular	0.663	0.0894	7.41
Endocrine	0.697	0.0696	10.01
Gastrointestinal	0.668	0.0774	8.64
Immune	0.594	0.0545	10.9
Kidney and Bladder	0.672	0.063	10.67
Liver	0.681	0.0877	7.77
Lung	0.583	0.0488	11.95
Muscle	0.556	0.0487	11.43
Nerve	0.643	0.0779	8.25
Ovary	0.593	0.0426	13.92
Pancreas	0.572	0.0336	17.04
Prostate	0.509	0.047	10.83
Skin	0.614	0.0618	9.93
