# Supplementary material
Source: Research Square preprint supplement (doi:10.21203/rs.3.rs-9173304/v1)
Supplement: Supplementary file 3 [file 98d08701403a4c57591e96e1.xlsx]

## Sheet: README
	Sheet	Description
	S1	ICD-10 codes used as basis for all diseases in study
	S2	ICD-9 codes used as basis for all diseases in study
	S3	Definition of more granular cancer variables, ICDs used
	S4	Definition of disease groups used for the multimorbidity analyses
	Sheet	Column description
	S1	Chronic disease: The diagnosis name
		ICD-10
		Labels
		Inclusion: Excludes specific disease codes from the given diagnosis
	S2	Chronic disease: The diagnosis name
		ICD-9
		Labels
		Inclusion: Excludes specific disease codes from the given diagnosis
	S3	cancer: Name of cancer diagnosis
		icd_10
		icd_9
	S4	Disease_Group: Name of multimorbidity group
		Number_of_Diseases: Total number of individual diseases/diagnoses in group
		Diseases: Included diagnosis names (same names used in S1-S2)

## Sheet: S1
	Chronic disease	ICD-10	Labels	Inclusion
	Allergy	J301	Allergic rhinitis due to pollen	Included
	Allergy	J302	Other seasonal allergic rhinitis	Included
	Allergy	J303	Other allergic rhinitis	Included
	Allergy	J304	Allergic rhinitis, unspecified	Included
	Allergy	J450	Predominantly allergic asthma	Included
	Allergy	K522	Allergic and dietetic gastroenteritis and colitis	Included
	Allergy	L20	Atopic dermatitis	Included
	Allergy	L23	Allergic contact dermatitis	Included
	Allergy	L500	Allergic urticaria	Included
	Allergy	Z516	Desensitization to allergens	Included
	Anemia	D50	Iron deficiency anaemia	Included
	Anemia	D51	Vitamin B12 deficiency anaemia	Included
	Anemia	D52	Folate deficiency anaemia	Included
	Anemia	D53	Other nutritional anaemias	Included
	Anemia	D55	Anaemia due to enzyme disorders	Included
	Anemia	D56	Thalassaemia	Included
	Anemia	D57	Sickle-cell disorders	Included
	Anemia	D58	Other hereditary haemolytic anaemias	Included
	Anemia	D59	Acquired haemolytic anaemia	Included
	Anemia	D60	Acquired pure red cell aplasia [erythroblastopenia]	Included
	Anemia	D61	Other aplastic anaemias	Included
	Anemia	D63	Anaemia in chronic diseases classified elsewhere	Included
	Anemia	D64	Other anaemias	Included
	Asthma	J45	Asthma	Included
	Atrial fibrillation	I48	Atrial fibrillation and flutter	Included
	Autoimmune disease	I731	Thromboangiitis obliterans [Buerger]	Included
	Autoimmune disease	L10	Pemphigus	Included
	Autoimmune disease	L12	Pemphigoid	Included
	Autoimmune disease	L40	Psoriasis	Included
	Autoimmune disease	L41	Parapsoriasis	Included
	Autoimmune disease	L93	Lupus erythematosus	Included
	Autoimmune disease	L94	Other localized connective tissue disorders	Included
	Autoimmune disease	L95	Vasculitis limited to skin, not elsewhere classified	Included
	Autoimmune disease	M30	Polyarteritis nodosa and related conditions	Included
	Autoimmune disease	M31	Other necrotizing vasculopathies	Included
	Autoimmune disease	M32	Systemic lupus erythematosus	Included
	Autoimmune disease	M33	Dermatopolymyositis	Included
	Autoimmune disease	M34	Systemic sclerosis	Included
	Autoimmune disease	M35	Other systemic involvement of connective tissue	Included
	Autoimmune disease	M36	Systemic disorders of connective tissue in diseases classified elsewhere	Included
	Blindness, Visual impairment	H54	Visual impairment including blindness (binocular or monocular)	Included
	Blindness, Visual impairment	Z442	Fitting and adjustment of artificial eye	Included
	Blindness, Visual impairment	Z970	Presence of artificial eye	Included
	Blood and blood forming organ diseases	D66	Hereditary factor VIII deficiency	Included
	Blood and blood forming organ diseases	D67	Hereditary factor IX deficiency	Included
	Blood and blood forming organ diseases	D68	Other coagulation defects	Included
	Blood and blood forming organ diseases	D69	Purpura and other haemorrhagic conditions	Included
	Blood and blood forming organ diseases	D71	Functional disorders of polymorphonuclear neutrophils	Included
	Blood and blood forming organ diseases	D720	Genetic anomalies of leukocytes	Included
	Blood and blood forming organ diseases	D730	Hyposplenism	Included
	Blood and blood forming organ diseases	D731	Hypersplenism	Included
	Blood and blood forming organ diseases	D732	Chronic congestive splenomegaly	Included
	Blood and blood forming organ diseases	D74	Methaemoglobinaemia	Included
	Blood and blood forming organ diseases	D750	Familial erythrocytosis	Included
	Blood and blood forming organ diseases	D761	Haemophagocytic lymphohistiocytosis	Included
	Blood and blood forming organ diseases	D763	Other histiocytosis syndromes	Included
	Blood and blood forming organ diseases	D77	Other disorders of blood and blood-forming organs in diseases classified elsewhere	Included
	Blood and blood forming organ diseases	D80	Immunodeficiency with predominantly antibody defects	Included
	Blood and blood forming organ diseases	D81	Combined immunodeficiencies	Included
	Blood and blood forming organ diseases	D82	Immunodeficiency associated with other major defects	Included
	Blood and blood forming organ diseases	D83	Common variable immunodeficiency	Included
	Blood and blood forming organ diseases	D84	Other immunodeficiencies	Included
	Blood and blood forming organ diseases	D86	Sarcoidosis	Included
	Blood and blood forming organ diseases	D89	Other disorders involving the immune mechanism, not elsewhere classified	Included
	Bradycardias and conduction diseases	I441	Atrioventricular block, second degree	Included
	Bradycardias and conduction diseases	I442	Atrioventricular block, complete	Included
	Bradycardias and conduction diseases	I443	Other and unspecified atrioventricular block	Included
	Bradycardias and conduction diseases	I453	Trifascicular block	Included
	Bradycardias and conduction diseases	I455	Other specified heart block	Included
	Bradycardias and conduction diseases	Z950	Presence of cardiac pacemaker	Included
	Cardiac valve diseases	I05	Rheumatic mitral valve diseases	Included
	Cardiac valve diseases	I06	Rheumatic aortic valve diseases	Included
	Cardiac valve diseases	I07	Rheumatic tricuspid valve diseases	Included
	Cardiac valve diseases	I08	Multiple valve diseases	Included
	Cardiac valve diseases	I091	Rheumatic diseases of endocardium, valve unspecified	Included
	Cardiac valve diseases	I098	Other specified rheumatic heart diseases	Included
	Cardiac valve diseases	I34	Nonrheumatic mitral valve disorders	Included
	Cardiac valve diseases	I35	Nonrheumatic aortic valve disorders	Included
	Cardiac valve diseases	I36	Nonrheumatic tricuspid valve disorders	Included
	Cardiac valve diseases	I37	Pulmonary valve disorders	Included
	Cardiac valve diseases	I38	Endocarditis, valve unspecified	Included
	Cardiac valve diseases	I390	Mitral valve disorders in diseases classified elsewhere	Included
	Cardiac valve diseases	I391	Aortic valve disorders in diseases classified elsewhere	Included
	Cardiac valve diseases	I392	Tricuspid valve disorders in diseases classified elsewhere	Included
	Cardiac valve diseases	I393	Pulmonary valve disorders in diseases classified elsewhere	Included
	Cardiac valve diseases	I394	Multiple valve disorders in diseases classified elsewhere	Included
	Cardiac valve diseases	Q22	Congenital malformations of pulmonary and tricuspid valves	Included
	Cardiac valve diseases	Q23	Congenital malformations of aortic and mitral valves	Included
	Cardiac valve diseases	Z952	Presence of prosthetic heart valve	Included
	Cardiac valve diseases	Z953	Presence of xenogenic heart valve	Included
	Cardiac valve diseases	Z954	Presence of other heart-valve replacement	Included
	Cataract and other lens diseases	H25	Senile cataract	Included
	Cataract and other lens diseases	H26	Other cataract	Included
	Cataract and other lens diseases	H27	Other disorders of lens	Included
	Cataract and other lens diseases	H28	Cataract and other disorders of lens in diseases classified elsewhere	Included
	Cataract and other lens diseases	Q12	Congenital lens malformations	Included
	Cataract and other lens diseases	Z961	Presence of intraocular lens	Included
	Cerebrovascular disease	G45	Transient cerebral ischaemic attacks and related syndromes	Included
	Cerebrovascular disease	G46	Vascular syndromes of brain in cerebrovascular diseases	Included
	Cerebrovascular disease	I60	Subarachnoid haemorrhage	Included
	Cerebrovascular disease	I61	Intracerebral haemorrhage	Included
	Cerebrovascular disease	I62	Other nontraumatic intracranial haemorrhage	Included
	Cerebrovascular disease	I63	Cerebral infarction	Included
	Cerebrovascular disease	I64	Stroke, not specified as haemorrhage or infarction	Included
	Cerebrovascular disease	I67	Other cerebrovascular diseases	Included
	Cerebrovascular disease	I69	Sequelae of cerebrovascular disease	Included
	Chromosomal abnormalities	Q90	Down syndrome	Included
	Chromosomal abnormalities	Q91	Edwards syndrome and Patau syndrome	Included
	Chromosomal abnormalities	Q92	Other trisomies and partial trisomies of the autosomes, not elsewhere classified	Included
	Chromosomal abnormalities	Q93	Monosomies and deletions from the autosomes, not elsewhere classified	Included
	Chromosomal abnormalities	Q95	Balanced rearrangements and structural markers, not elsewhere classified	Included
	Chromosomal abnormalities	Q96	Turner syndrome	Included
	Chromosomal abnormalities	Q97	Other sex chromosome abnormalities, female phenotype, not elsewhere classified	Included
	Chromosomal abnormalities	Q98	Other sex chromosome abnormalities, male phenotype, not elsewhere classified	Included
	Chromosomal abnormalities	Q99	Other chromosome abnormalities, not elsewhere classified	Included
	Chronic infectious diseases	A15	Respiratory tuberculosis, bacteriologically and histologically confirmed	Included
	Chronic infectious diseases	A16	Respiratory tuberculosis, not confirmed bacteriologically or histologically	Included
	Chronic infectious diseases	A17	Tuberculosis of nervous system	Included
	Chronic infectious diseases	A18	Tuberculosis of other organs	Included
	Chronic infectious diseases	A19	Miliary tuberculosis	Included
	Chronic infectious diseases	A20	Leprosy [Hansen disease]	Included
	Chronic infectious diseases	A21	Infection due to other mycobacteria	Included
	Chronic infectious diseases	A22	Congenital syphilis	Included
	Chronic infectious diseases	A23	Late syphilis	Included
	Chronic infectious diseases	A24	Other and unspecified syphilis	Included
	Chronic infectious diseases	A25	Nonvenereal syphilis	Included
	Chronic infectious diseases	A26	Yaws	Included
	Chronic infectious diseases	A27	Pinta [carate]	Included
	Chronic infectious diseases	A28	Lyme disease	Included
	Chronic infectious diseases	A29	Atypical virus infections of central nervous system	Included
	Chronic infectious diseases	A30	Human immunodeficiency virus [HIV] disease resulting in infectious and parasitic diseases	Included
	Chronic infectious diseases	A31	Human immunodeficiency virus [HIV] disease resulting in malignant neoplasms	Included
	Chronic infectious diseases	A32	Human immunodeficiency virus [HIV] disease resulting in other specified diseases	Included
	Chronic infectious diseases	A33	Human immunodeficiency virus [HIV] disease resulting in other conditions	Included
	Chronic infectious diseases	A34	Unspecified human immunodeficiency virus [HIV] disease	Included
	Chronic infectious diseases	A35	Chronic pulmonary coccidioidomycosis	Included
	Chronic infectious diseases	A36	Chronic pulmonary histoplasmosis capsulati	Included
	Chronic infectious diseases	A37	Chronic pulmonary blastomycosis	Included
	Chronic infectious diseases	A38	Chagas disease (chronic) with heart involvement	Included
	Chronic infectious diseases	A39	Chagas disease (chronic) with digestive system involvement	Included
	Chronic infectious diseases	A40	Chagas disease (chronic) with nervous system involvement	Included
	Chronic infectious diseases	A41	Chagas disease (chronic) with other organ involvement	Included
	Chronic infectious diseases	A42	Schistosomiasis [bilharziasis]	Included
	Chronic infectious diseases	A43	Sequelae of leprosy	Included
	Chronic infectious diseases	B94	Sequelae of other and unspecified infectious and parasitic diseases	Included
	Chronic infectious diseases	J65	Pneumoconiosis associated with tuberculosis	Included
	Chronic infectious diseases	M863	Chronic multifocal osteomyelitis	Included
	Chronic infectious diseases	M864	Chronic osteomyelitis with draining sinus	Included
	Chronic infectious diseases	M865	Other chronic haematogenous osteomyelitis	Included
	Chronic infectious diseases	M866	Other chronic osteomyelitis	Included
	Chronic kidney diseases	I120	Hypertensive renal disease with renal failure	Included
	Chronic kidney diseases	I130	Hypertensive heart and renal disease with (congestive) heart failure	Included
	Chronic kidney diseases	I131	Hypertensive heart and renal disease with renal failure	Included
	Chronic kidney diseases	I132	Hypertensive heart and renal disease with both (congestive) heart failure and renal failure	Included
	Chronic kidney diseases	I139	Hypertensive heart and renal disease, unspecified	Included
	Chronic kidney diseases	N01	Rapidly progressive nephritic syndrome	Included
	Chronic kidney diseases	N03	Chronic nephritic syndrome	Included
	Chronic kidney diseases	N04	Nephrotic syndrome	Included
	Chronic kidney diseases	N05	Unspecified nephritic syndrome	Included
	Chronic kidney diseases	N07	Hereditary nephropathy, not elsewhere classified	Included
	Chronic kidney diseases	N08	Glomerular disorders in diseases classified elsewhere	Included
	Chronic kidney diseases	N11	Chronic tubulo-interstitial nephritis	Included
	Chronic kidney diseases	N183	Chronic kidney disease, stage 3	Included
	Chronic kidney diseases	N184	Chronic kidney disease, stage 4	Included
	Chronic kidney diseases	N185	Chronic kidney disease, stage 5	Included
	Chronic kidney diseases	N189	Chronic kidney disease, unspecified	Included
	Chronic kidney diseases	Q60	Renal agenesis and other reduction defects of kidney	Included
	Chronic kidney diseases	Q611	Polycystic kidney, autosomal recessive	Included
	Chronic kidney diseases	Q612	Polycystic kidney, autosomal dominant	Included
	Chronic kidney diseases	Q613	Polycystic kidney, unspecified	Included
	Chronic kidney diseases	Q614	Renal dysplasia	Included
	Chronic kidney diseases	Q615	Medullary cystic kidney	Included
	Chronic kidney diseases	Q618	Other cystic kidney diseases	Included
	Chronic kidney diseases	Q619	Cystic kidney disease, unspecified	Included
	Chronic kidney diseases	Z905	Acquired absence of kidney	Included
	Chronic kidney diseases	Z940	Kidney transplant status	Included
	Chronic liver diseases	B18	Chronic viral hepatitis	Included
	Chronic liver diseases	K70	Alcoholic liver disease	Included
	Chronic liver diseases	K713	Toxic liver disease with chronic persistent hepatitis	Included
	Chronic liver diseases	K714	Toxic liver disease with chronic lobular hepatitis	Included
	Chronic liver diseases	K715	Toxic liver disease with chronic active hepatitis	Included
	Chronic liver diseases	K717	Toxic liver disease with fibrosis and cirrhosis of liver	Included
	Chronic liver diseases	K721	Chronic hepatic failure	Included
	Chronic liver diseases	K73	Chronic hepatitis, not elsewhere classified	Included
	Chronic liver diseases	K74	Fibrosis and cirrhosis of liver	Included
	Chronic liver diseases	K753	Granulomatous hepatitis, not elsewhere classified	Included
	Chronic liver diseases	K754	Autoimmune hepatitis	Included
	Chronic liver diseases	K758	Other specified inflammatory liver diseases	Included
	Chronic liver diseases	K761	Chronic passive congestion of liver	Included
	Chronic liver diseases	K766	Portal hypertension	Included
	Chronic liver diseases	K767	Hepatorenal syndrome	Included
	Chronic liver diseases	K778	Liver disorders in other diseases classified elsewhere	Included
	Chronic liver diseases	Q446	Cystic disease of liver	Included
	Chronic liver diseases	Z944	Liver transplant status	Included
	Chronic pancreas, biliary tract and gallbladder diseases	K800	Calculus of gallbladder with acute cholecystitis	Included
	Chronic pancreas, biliary tract and gallbladder diseases	K801	Calculus of gallbladder with other cholecystitis	Included
	Chronic pancreas, biliary tract and gallbladder diseases	K802	Calculus of gallbladder without cholecystitis	Included
	Chronic pancreas, biliary tract and gallbladder diseases	K808	Other cholelithiasis	Included
	Chronic pancreas, biliary tract and gallbladder diseases	K811	Chronic cholecystitis	Included
	Chronic pancreas, biliary tract and gallbladder diseases	K86	Other diseases of pancreas	Included
	Chronic pancreas, biliary tract and gallbladder diseases	Q440	Agenesis, aplasia and hypoplasia of gallbladder	Included
	Chronic pancreas, biliary tract and gallbladder diseases	Q441	Other congenital malformations of gallbladder	Included
	Chronic pancreas, biliary tract and gallbladder diseases	Q442	Atresia of bile ducts	Included
	Chronic pancreas, biliary tract and gallbladder diseases	Q443	Congenital stenosis and stricture of bile ducts	Included
	Chronic pancreas, biliary tract and gallbladder diseases	Q444	Choledochal cyst	Included
	Chronic pancreas, biliary tract and gallbladder diseases	Q445	Other congenital malformations of bile ducts	Included
	Chronic pancreas, biliary tract and gallbladder diseases	Q450	Agenesis, aplasia and hypoplasia of pancreas	Included
	Chronic ulcer of the skin	I830	Varicose veins of lower extremities with ulcer	Included
	Chronic ulcer of the skin	I832	Varicose veins of lower extremities with both ulcer and inflammation	Included
	Chronic ulcer of the skin	L89	Decubitus ulcer and pressure area	Included
	Chronic ulcer of the skin	L97	Ulcer of lower limb, not elsewhere classified	Included
	Chronic ulcer of the skin	L984	Chronic ulcer of skin, not elsewhere classified	Included
	Colitis and related diseases	K520	Gastroenteritis and colitis due to radiation	Included
	Colitis and related diseases	K528	Other specified noninfective gastroenteritis and colitis	Included
	Colitis and related diseases	K551	Chronic vascular disorders of intestine	Included
	Colitis and related diseases	K552	Angiodysplasia of colon	Included
	Colitis and related diseases	K572	Diverticular disease of large intestine with perforation and abscess	Included
	Colitis and related diseases	K573	Diverticular disease of large intestine without perforation or abscess	Included
	Colitis and related diseases	K574	Diverticular disease of both small and large intestine with perforation and abscess	Included
	Colitis and related diseases	K575	Diverticular disease of both small and large intestine without perforation or abscess	Included
	Colitis and related diseases	K578	Diverticular disease of intestine, part unspecified, with perforation and abscess	Included
	Colitis and related diseases	K579	Diverticular disease of intestine, part unspecified, without perforation or abscess	Included
	Colitis and related diseases	K58	Irritable bowel syndrome	Included
	Colitis and related diseases	K590	Constipation	Included
	Colitis and related diseases	K592	Neurogenic bowel, not elsewhere classified	Included
	Colitis and related diseases	K62	Other diseases of anus and rectum	Included
	Colitis and related diseases	K634	Enteroptosis	Included
	Colitis and related diseases	K64	Haemorrhoids and perianal venous thrombosis	Included
	COPD, Emphysema, Chronic bronchitis	J41	Simple and mucopurulent chronic bronchitis	Included
	COPD, Emphysema, Chronic bronchitis	J42	Unspecified chronic bronchitis	Included
	COPD, Emphysema, Chronic bronchitis	J43	Emphysema	Included
	COPD, Emphysema, Chronic bronchitis	J44	Other chronic obstructive pulmonary disease	Included
	COPD, Emphysema, Chronic bronchitis	J47	Bronchiectasis	Included
	Deafness, Hearing impairment	H80	Otosclerosis	Included
	Deafness, Hearing impairment	H90	Conductive and sensorineural hearing loss	Included
	Deafness, Hearing impairment	H911	Presbycusis	Included
	Deafness, Hearing impairment	H913	Deaf mutism, not elsewhere classified	Included
	Deafness, Hearing impairment	H919	Hearing loss, unspecified	Included
	Deafness, Hearing impairment	Q16	Congenital malformations of ear causing impairment of hearing	Included
	Deafness, Hearing impairment	Z453	Adjustment and management of implanted hearing device	Included
	Deafness, Hearing impairment	Z461	Fitting and adjustment of hearing aid	Included
	Deafness, Hearing impairment	Z962	Presence of otological and audiological implants	Included
	Deafness, Hearing impairment	Z974	Presence of external hearing-aid	Included
	Dementia	F00	Dementia in Alzheimer disease	Included
	Dementia	F01	Vascular dementia	Included
	Dementia	F02	Dementia in other diseases classified elsewhere	Included
	Dementia	F03	Unspecified dementia	Included
	Dementia	F051	Delirium superimposed on dementia	Included
	Dementia	G30	Alzheimer disease	Included
	Dementia	G31	Other degenerative diseases of nervous system, not elsewhere classified	Included
	Depression and mood diseases	F30	Manic episode	Included
	Depression and mood diseases	F31	Bipolar affective disorder	Included
	Depression and mood diseases	F32	Depressive episode	Included
	Depression and mood diseases	F33	Recurrent depressive disorder	Included
	Depression and mood diseases	F34	Persistent mood [affective] disorders	Included
	Depression and mood diseases	F38	Other mood [affective] disorders	Included
	Depression and mood diseases	F39	Unspecified mood [affective] disorder	Included
	Depression and mood diseases	F412	Mixed anxiety and depressive disorder	Included
	Diabetes	E10	Insulin-dependent diabetes mellitus	Included
	Diabetes	E11	Non-insulin-dependent diabetes mellitus	Included
	Diabetes	E13	Other specified diabetes mellitus	Included
	Diabetes	E14	Unspecified diabetes mellitus	Included
	Diabetes	E891	Postprocedural hypoinsulinaemia	Included
	Dorsopathies	M40	Kyphosis and lordosis	Included
	Dorsopathies	M41	Scoliosis	Included
	Dorsopathies	M42	Spinal osteochondrosis	Included
	Dorsopathies	M43	Other deforming dorsopathies	Included
	Dorsopathies	M47	Spondylosis	Included
	Dorsopathies	M48	Other spondylopathies	Included
	Dorsopathies	M49	Spondylopathies in diseases classified elsewhere	Included
	Dorsopathies	M50	Cervical disc disorders	Included
	Dorsopathies	M51	Other intervertebral disc disorders	Included
	Dorsopathies	M53	Other dorsopathies, not elsewhere classified	Included
	Dorsopathies	Q675	Congenital deformity of spine	Included
	Dorsopathies	Q761	Klippel-Feil syndrome	Included
	Dorsopathies	Q764	Other congenital malformations of spine, not associated with scoliosis	Included
	Dyslipidemia	E78	Disorders of lipoprotein metabolism and other lipidaemias	Included
	Ear, nose, throat diseases	H604	Cholesteatoma of external ear	Included
	Ear, nose, throat diseases	H661	Chronic tubotympanic suppurative otitis media	Included
	Ear, nose, throat diseases	H662	Chronic atticoantral suppurative otitis media	Included
	Ear, nose, throat diseases	H663	Other chronic suppurative otitis media	Included
	Ear, nose, throat diseases	H701	Chronic mastoiditis	Included
	Ear, nose, throat diseases	H71	Cholesteatoma of middle ear	Included
	Ear, nose, throat diseases	H731	Chronic myringitis	Included
	Ear, nose, throat diseases	H741	Adhesive middle ear disease	Included
	Ear, nose, throat diseases	H810	Meniere disease	Included
	Ear, nose, throat diseases	H831	Labyrinthine fistula	Included
	Ear, nose, throat diseases	H832	Labyrinthine dysfunction	Included
	Ear, nose, throat diseases	H95	Postprocedural disorders of ear and mastoid process, not elsewhere classified	Included
	Ear, nose, throat diseases	J300	Vasomotor rhinitis	Included
	Ear, nose, throat diseases	J31	Chronic rhinitis, nasopharyngitis and pharyngitis	Included
	Ear, nose, throat diseases	J32	Chronic sinusitis	Included
	Ear, nose, throat diseases	J33	Nasal polyp	Included
	Ear, nose, throat diseases	J341	Cyst and mucocele of nose and nasal sinus	Included
	Ear, nose, throat diseases	J342	Deviated nasal septum	Included
	Ear, nose, throat diseases	J343	Hypertrophy of nasal turbinates	Included
	Ear, nose, throat diseases	J35	Chronic diseases of tonsils and adenoids	Included
	Ear, nose, throat diseases	J37	Chronic laryngitis and laryngotracheitis	Included
	Ear, nose, throat diseases	J380	Paralysis of vocal cords and larynx	Included
	Ear, nose, throat diseases	J386	Stenosis of larynx	Included
	Ear, nose, throat diseases	K051	Chronic gingivitis	Included
	Ear, nose, throat diseases	K053	Chronic periodontitis	Included
	Ear, nose, throat diseases	K07	Dentofacial anomalies [including malocclusion]	Included
	Ear, nose, throat diseases	K110	Atrophy of salivary gland	Included
	Ear, nose, throat diseases	K117	Disturbances of salivary secretion	Included
	Ear, nose, throat diseases	Q30	Congenital malformations of nose	Included
	Ear, nose, throat diseases	Q31	Congenital malformations of larynx	Included
	Ear, nose, throat diseases	Q32	Congenital malformations of trachea and bronchus	Included
	Ear, nose, throat diseases	Q35	Cleft palate	Included
	Ear, nose, throat diseases	Q36	Cleft lip	Included
	Ear, nose, throat diseases	Q37	Cleft palate with cleft lip	Included
	Ear, nose, throat diseases	Q38	Other congenital malformations of tongue, mouth and pharynx	Included
	Epilepsy	G40	Epilepsy	Included
	Esophagus, stomach and duodenum diseases	I85	Oesophageal varices	Included
	Esophagus, stomach and duodenum diseases	I864	Gastric varices	Included
	Esophagus, stomach and duodenum diseases	I982	Oesophageal varices without bleeding in diseases classified elsewhere	Included
	Esophagus, stomach and duodenum diseases	I983	Oesophageal varices with bleeding in diseases classified elsewhere	Included
	Esophagus, stomach and duodenum diseases	K21	Gastro-oesophageal reflux disease	Included
	Esophagus, stomach and duodenum diseases	K220	Achalasia of cardia	Included
	Esophagus, stomach and duodenum diseases	K222	Oesophageal obstruction	Included
	Esophagus, stomach and duodenum diseases	K224	Dyskinesia of oesophagus	Included
	Esophagus, stomach and duodenum diseases	K225	Diverticulum of oesophagus, acquired	Included
	Esophagus, stomach and duodenum diseases	K227	Barrett oesophagus	Included
	Esophagus, stomach and duodenum diseases	K230	Tuberculous oesophagitis	Included
	Esophagus, stomach and duodenum diseases	K231	Megaoesophagus in Chagas disease	Included
	Esophagus, stomach and duodenum diseases	K254	Gastric ulcer: Chronic or unspecified with haemorrhage	Included
	Esophagus, stomach and duodenum diseases	K255	Gastric ulcer: Chronic or unspecified with perforation	Included
	Esophagus, stomach and duodenum diseases	K256	Gastric ulcer: Chronic or unspecified with both haemorrhage and perforation	Included
	Esophagus, stomach and duodenum diseases	K257	Gastric ulcer: Chronic without haemorrhage or perforation	Included
	Esophagus, stomach and duodenum diseases	K264	Duodenal ulcer: Chronic or unspecified with haemorrhage	Included
	Esophagus, stomach and duodenum diseases	K265	Duodenal ulcer: Chronic or unspecified with perforation	Included
	Esophagus, stomach and duodenum diseases	K266	Duodenal ulcer: Chronic or unspecified with both haemorrhage and perforation	Included
	Esophagus, stomach and duodenum diseases	K267	Duodenal ulcer: Chronic without haemorrhage or perforation	Included
	Esophagus, stomach and duodenum diseases	K274	Peptic ulcer, site unspecified: Chronic or unspecified with haemorrhage	Included
	Esophagus, stomach and duodenum diseases	K275	Peptic ulcer, site unspecified: Chronic or unspecified with perforation	Included
	Esophagus, stomach and duodenum diseases	K276	Peptic ulcer, site unspecified: Chronic or unspecified with both haemorrhage and perforation	Included
	Esophagus, stomach and duodenum diseases	K277	Peptic ulcer, site unspecified: Chronic without haemorrhage or perforation	Included
	Esophagus, stomach and duodenum diseases	K284	Gastrojejunal ulcer: Chronic or unspecified with haemorrhage	Included
	Esophagus, stomach and duodenum diseases	K285	Gastrojejunal ulcer: Chronic or unspecified with perforation	Included
	Esophagus, stomach and duodenum diseases	K286	Gastrojejunal ulcer: Chronic or unspecified with both haemorrhage and perforation	Included
	Esophagus, stomach and duodenum diseases	K287	Gastrojejunal ulcer: Chronic without haemorrhage or perforation	Included
	Esophagus, stomach and duodenum diseases	K293	Chronic superficial gastritis	Included
	Esophagus, stomach and duodenum diseases	K294	Chronic atrophic gastritis	Included
	Esophagus, stomach and duodenum diseases	K295	Chronic gastritis, unspecified	Included
	Esophagus, stomach and duodenum diseases	K296	Other gastritis	Included
	Esophagus, stomach and duodenum diseases	K297	Gastritis, unspecified	Included
	Esophagus, stomach and duodenum diseases	K298	Duodenitis	Included
	Esophagus, stomach and duodenum diseases	K299	Gastroduodenitis, unspecified	Included
	Esophagus, stomach and duodenum diseases	K311	Adult hypertrophic pyloric stenosis	Included
	Esophagus, stomach and duodenum diseases	K312	Hourglass stricture and stenosis of stomach	Included
	Esophagus, stomach and duodenum diseases	K313	Pylorospasm, not elsewhere classified	Included
	Esophagus, stomach and duodenum diseases	K314	Gastric diverticulum	Included
	Esophagus, stomach and duodenum diseases	K315	Obstruction of duodenum	Included
	Esophagus, stomach and duodenum diseases	Q39	Congenital malformations of oesophagus	Included
	Esophagus, stomach and duodenum diseases	Q40	Other congenital malformations of upper alimentary tract	Included
	Esophagus, stomach and duodenum diseases	Z903	Acquired absence of part of stomach	Included
	Glaucoma	H401	Primary open-angle glaucoma	Included
	Glaucoma	H402	Primary angle-closure glaucoma	Included
	Glaucoma	H403	Glaucoma secondary to eye trauma	Included
	Glaucoma	H404	Glaucoma secondary to eye inflammation	Included
	Glaucoma	H405	Glaucoma secondary to other eye disorders	Included
	Glaucoma	H406	Glaucoma secondary to drugs	Included
	Glaucoma	H408	Other glaucoma	Included
	Glaucoma	H409	Glaucoma, unspecified	Included
	Heart failure	I110	Hypertensive heart disease with (congestive) heart failure	Included
	Heart failure	I130	Hypertensive heart and renal disease with (congestive) heart failure	Included
	Heart failure	I132	Hypertensive heart and renal disease with both (congestive) heart failure and renal failure	Included
	Heart failure	I27	Other pulmonary heart diseases	Included
	Heart failure	I280	Arteriovenous fistula of pulmonary vessels	Included
	Heart failure	I42	Cardiomyopathy	Included
	Heart failure	I43	Cardiomyopathy in diseases classified elsewhere	Included
	Heart failure	I50	Heart failure	Included
	Heart failure	I515	Myocardial degeneration	Included
	Heart failure	I517	Cardiomegaly	Included
	Heart failure	I528	Other heart disorders in other diseases classified elsewhere	Included
	Heart failure	Z941	Heart transplant status	Included
	Heart failure	Z943	Heart and lungs transplant status	Included
	Hematological neoplasms	C81	Hodgkin lymphoma	Included
	Hematological neoplasms	C82	Follicular lymphoma	Included
	Hematological neoplasms	C83	Non-follicular lymphoma	Included
	Hematological neoplasms	C84	Mature T/NK-cell lymphomas	Included
	Hematological neoplasms	C85	Other and unspecified types of non-Hodgkin lymphoma	Included
	Hematological neoplasms	C86	Other specified types of T/NK-cell lymphoma	Included
	Hematological neoplasms	C88	Malignant immunoproliferative diseases	Included
	Hematological neoplasms	C90	Multiple myeloma and malignant plasma cell neoplasms	Included
	Hematological neoplasms	C91	Lymphoid leukaemia	Included
	Hematological neoplasms	C92	Myeloid leukaemia	Included
	Hematological neoplasms	C93	Monocytic leukaemia	Included
	Hematological neoplasms	C94	Other leukaemias of specified cell type	Included
	Hematological neoplasms	C95	Leukaemia of unspecified cell type	Included
	Hematological neoplasms	C96	Other and unspecified malignant neoplasms of lymphoid, haematopoietic and related tissue	Included
	Hypertension	I10	Essential (primary) hypertension	Included
	Hypertension	I11	Hypertensive heart disease	Included
	Hypertension	I12	Hypertensive renal disease	Included
	Hypertension	I13	Hypertensive heart and renal disease	Included
	Hypertension	I15	Secondary hypertension	Included
	Inflammatory arthropathies	M023	Reiter disease	Included
	Inflammatory arthropathies	M05	Seropositive rheumatoid arthritis	Included
	Inflammatory arthropathies	M06	Other rheumatoid arthritis	Included
	Inflammatory arthropathies	M07	Psoriatic and enteropathic arthropathies	Included
	Inflammatory arthropathies	M08	Juvenile arthritis	Included
	Inflammatory arthropathies	M09	Juvenile arthritis in diseases classified elsewhere	Included
	Inflammatory arthropathies	M10	Gout	Included
	Inflammatory arthropathies	M11	Other crystal arthropathies	Included
	Inflammatory arthropathies	M12	Other specific arthropathies	Included
	Inflammatory arthropathies	M13	Other arthritis	Included
	Inflammatory arthropathies	M14	Arthropathies in other diseases classified elsewhere	Included
	Inflammatory arthropathies	M45	Ankylosing spondylitis	Included
	Inflammatory arthropathies	M460	Spinal enthesopathy	Included
	Inflammatory arthropathies	M461	Sacroiliitis, not elsewhere classified	Included
	Inflammatory arthropathies	M468	Other specified inflammatory spondylopathies	Included
	Inflammatory arthropathies	M469	Inflammatory spondylopathy, unspecified	Included
	Inflammatory bowel disease	K50	Crohn disease [regional enteritis]	Included
	Inflammatory bowel disease	K51	Ulcerative colitis	Included
	Ischemic heart disease	I20	Angina pectoris	Included
	Ischemic heart disease	I21	Acute myocardial infarction	Included
	Ischemic heart disease	I22	Subsequent myocardial infarction	Included
	Ischemic heart disease	I24	Other acute ischaemic heart diseases	Included
	Ischemic heart disease	I25	Chronic ischaemic heart disease	Included
	Ischemic heart disease	Z951	Presence of aortocoronary bypass graft	Included
	Ischemic heart disease	Z955	Presence of coronary angioplasty implant and graft	Included
	Migraine and facial pain syndromes	G43	Migraine	Included
	Migraine and facial pain syndromes	G440	Cluster headache syndrome	Included
	Migraine and facial pain syndromes	G441	Vascular headache, not elsewhere classified	Included
	Migraine and facial pain syndromes	G442	Tension-type headache	Included
	Migraine and facial pain syndromes	G443	Chronic post-traumatic headache	Included
	Migraine and facial pain syndromes	G448	Other specified headache syndromes	Included
	Migraine and facial pain syndromes	G50	Disorders of trigeminal nerve	Included
	Multiple sclerosis	G35	Multiple sclerosis	Included
	Neurotic, stress-related and somatoform diseases	F40	Phobic anxiety disorders	Included
	Neurotic, stress-related and somatoform diseases	F41	Other anxiety disorders	Included
	Neurotic, stress-related and somatoform diseases	F42	Obsessive-compulsive disorder	Included
	Neurotic, stress-related and somatoform diseases	F43	Reaction to severe stress, and adjustment disorders	Included
	Neurotic, stress-related and somatoform diseases	F44	Dissociative [conversion] disorders	Included
	Neurotic, stress-related and somatoform diseases	F45	Somatoform disorders	Included
	Neurotic, stress-related and somatoform diseases	F48	Other neurotic disorders	Included
	Obesity	E66	Obesity	Included
	Osteoarthritis	M15	Polyarthrosis	Included
	Osteoarthritis	M16	Coxarthrosis [arthrosis of hip]	Included
	Osteoarthritis	M17	Gonarthrosis [arthrosis of knee]	Included
	Osteoarthritis	M18	Arthrosis of first carpometacarpal joint	Included
	Osteoarthritis	M19	Other arthrosis	Included
	Osteoarthritis	M362	Haemophilic arthropathy	Included
	Osteoarthritis	M363	Arthropathy in other blood disorders	Included
	Osteoporosis	M80	Osteoporosis with pathological fracture	Included
	Osteoporosis	M81	Osteoporosis without pathological fracture	Included
	Osteoporosis	M82	Osteoporosis in diseases classified elsewhere	Included
	Other cardiovascular diseases	I09	Other rheumatic heart diseases	Included
	Other cardiovascular diseases	I281	Aneurysm of pulmonary artery	Included
	Other cardiovascular diseases	I310	Chronic adhesive pericarditis	Included
	Other cardiovascular diseases	I311	Chronic constrictive pericarditis	Included
	Other cardiovascular diseases	I456	Pre-excitation syndrome	Included
	Other cardiovascular diseases	I495	Sick sinus syndrome	Included
	Other cardiovascular diseases	I498	Other specified cardiac arrhythmias	Included
	Other cardiovascular diseases	I70	Atherosclerosis	Included
	Other cardiovascular diseases	I71	Aortic aneurysm and dissection	Included
	Other cardiovascular diseases	I72	Other aneurysm and dissection	Included
	Other cardiovascular diseases	I790	Aneurysm of aorta in diseases classified elsewhere	Included
	Other cardiovascular diseases	I791	Aortitis in diseases classified elsewhere	Included
	Other cardiovascular diseases	I950	Idiopathic hypotension	Included
	Other cardiovascular diseases	I951	Orthostatic hypotension	Included
	Other cardiovascular diseases	I958	Other hypotension	Included
	Other cardiovascular diseases	Q20	Congenital malformations of cardiac chambers and connections	Included
	Other cardiovascular diseases	Q21	Congenital malformations of cardiac septa	Included
	Other cardiovascular diseases	Q24	Other congenital malformations of heart	Included
	Other cardiovascular diseases	Q25	Congenital malformations of great arteries	Included
	Other cardiovascular diseases	Q26	Congenital malformations of great veins	Included
	Other cardiovascular diseases	Q27	Other congenital malformations of peripheral vascular system	Included
	Other cardiovascular diseases	Q28	Other congenital malformations of circulatory system	Included
	Other cardiovascular diseases	Z958	Presence of other cardiac and vascular implants and grafts	Included
	Other cardiovascular diseases	Z959	Presence of cardiac and vascular implant and graft, unspecified	Included
	Other digestive diseases	K660	Peritoneal adhesions	Included
	Other digestive diseases	K900	Coeliac disease	Included
	Other digestive diseases	K901	Tropical sprue	Included
	Other digestive diseases	K902	Blind loop syndrome, not elsewhere classified	Included
	Other digestive diseases	K911	Postgastric surgery syndromes	Included
	Other digestive diseases	K93	Disorders of other digestive organs in diseases classified elsewhere	Included
	Other digestive diseases	Q41	Congenital absence, atresia and stenosis of small intestine	Included
	Other digestive diseases	Q42	Congenital absence, atresia and stenosis of large intestine	Included
	Other digestive diseases	Q43	Other congenital malformations of intestine	Included
	Other digestive diseases	R15	Faecal incontinence	Included
	Other digestive diseases	Z904	Acquired absence of other parts of digestive tract	Included
	Other digestive diseases	Z980	Intestinal bypass and anastomosis status	Included
	Other eye diseases	H022	Lagophthalmos	Included
	Other eye diseases	H023	Blepharochalasis	Included
	Other eye diseases	H024	Ptosis of eyelid	Included
	Other eye diseases	H025	Other disorders affecting eyelid function	Included
	Other eye diseases	H04	Disorders of lacrimal system	Included
	Other eye diseases	H05	Disorders of orbit	Included
	Other eye diseases	H104	Chronic conjunctivitis	Included
	Other eye diseases	H17	Corneal scars and opacities	Included
	Other eye diseases	H184	Corneal degeneration	Included
	Other eye diseases	H185	Hereditary corneal dystrophies	Included
	Other eye diseases	H186	Keratoconus	Included
	Other eye diseases	H187	Other corneal deformities	Included
	Other eye diseases	H188	Other specified disorders of cornea	Included
	Other eye diseases	H189	Disorder of cornea, unspecified	Included
	Other eye diseases	H193	Keratitis and keratoconjunctivitis in other diseases classified elsewhere	Included
	Other eye diseases	H198	Other disorders of sclera and cornea in diseases classified elsewhere	Included
	Other eye diseases	H201	Chronic iridocyclitis	Included
	Other eye diseases	H21	Other disorders of iris and ciliary body	Included
	Other eye diseases	H310	Chorioretinal scars	Included
	Other eye diseases	H311	Choroidal degeneration	Included
	Other eye diseases	H312	Hereditary choroidal dystrophy	Included
	Other eye diseases	H318	Other specified disorders of choroid	Included
	Other eye diseases	H319	Disorder of choroid, unspecified	Included
	Other eye diseases	H33	Retinal detachments and breaks	Included
	Other eye diseases	H352	Other proliferative retinopathy	Included
	Other eye diseases	H353	Degeneration of macula and posterior pole	Included
	Other eye diseases	H354	Peripheral retinal degeneration	Included
	Other eye diseases	H355	Hereditary retinal dystrophy	Included
	Other eye diseases	H357	Separation of retinal layers	Included
	Other eye diseases	H358	Other specified retinal disorders	Included
	Other eye diseases	H359	Retinal disorder, unspecified	Included
	Other eye diseases	H36	Retinal disorders in diseases classified elsewhere	Included
	Other eye diseases	H47	Other disorders of optic [2nd] nerve and visual pathways	Included
	Other eye diseases	H48	Disorders of optic [2nd] nerve and visual pathways in diseases classified elsewhere	Included
	Other eye diseases	H49	Paralytic strabismus	Included
	Other eye diseases	H51	Other disorders of binocular movement	Included
	Other eye diseases	Q10	Congenital malformations of eyelid, lacrimal apparatus and orbit	Included
	Other eye diseases	Q11	Anophthalmos, microphthalmos and macrophthalmos	Included
	Other eye diseases	Q13	Congenital malformations of anterior segment of eye	Included
	Other eye diseases	Q14	Congenital malformations of posterior segment of eye	Included
	Other eye diseases	Q15	Other congenital malformations of eye	Included
	Other eye diseases	Z947	Corneal transplant status	Included
	Other genitourinary diseases	B901	Sequelae of genitourinary tuberculosis	Included
	Other genitourinary diseases	N200	Calculus of kidney	Included
	Other genitourinary diseases	N202	Calculus of kidney with calculus of ureter	Included
	Other genitourinary diseases	N209	Urinary calculus, unspecified	Included
	Other genitourinary diseases	N210	Calculus in bladder	Included
	Other genitourinary diseases	N218	Other lower urinary tract calculus	Included
	Other genitourinary diseases	N219	Calculus of lower urinary tract, unspecified	Included
	Other genitourinary diseases	N22	Calculus of urinary tract in diseases classified elsewhere	Included
	Other genitourinary diseases	N301	Interstitial cystitis (chronic)	Included
	Other genitourinary diseases	N302	Other chronic cystitis	Included
	Other genitourinary diseases	N303	Trigonitis	Included
	Other genitourinary diseases	N304	Irradiation cystitis	Included
	Other genitourinary diseases	N31	Neuromuscular dysfunction of bladder, not elsewhere classified	Included
	Other genitourinary diseases	N320	Bladder-neck obstruction	Included
	Other genitourinary diseases	N323	Diverticulum of bladder	Included
	Other genitourinary diseases	N328	Other specified disorders of bladder	Included
	Other genitourinary diseases	N329	Bladder disorder, unspecified	Included
	Other genitourinary diseases	N33	Bladder disorders in diseases classified elsewhere	Included
	Other genitourinary diseases	N35	Urethral stricture	Included
	Other genitourinary diseases	N393	Stress incontinence	Included
	Other genitourinary diseases	N394	Other specified urinary incontinence	Included
	Other genitourinary diseases	N480	Leukoplakia of penis	Included
	Other genitourinary diseases	N484	Impotence of organic origin	Included
	Other genitourinary diseases	N489	Disorder of penis, unspecified	Included
	Other genitourinary diseases	N701	Chronic salpingitis and oophoritis	Included
	Other genitourinary diseases	N711	Chronic inflammatory disease of uterus	Included
	Other genitourinary diseases	N731	Chronic parametritis and pelvic cellulitis	Included
	Other genitourinary diseases	N734	Female chronic pelvic peritonitis	Included
	Other genitourinary diseases	N736	Female pelvic peritoneal adhesions	Included
	Other genitourinary diseases	N761	Subacute and chronic vaginitis	Included
	Other genitourinary diseases	N763	Subacute and chronic vulvitis	Included
	Other genitourinary diseases	N81	Female genital prolapse	Included
	Other genitourinary diseases	N88	Other noninflammatory disorders of cervix uteri	Included
	Other genitourinary diseases	N895	Stricture and atresia of vagina	Included
	Other genitourinary diseases	N905	Atrophy of vulva	Included
	Other genitourinary diseases	N952	Postmenopausal atrophic vaginitis	Included
	Other genitourinary diseases	Q54	Hypospadias	Included
	Other genitourinary diseases	Q620	Congenital hydronephrosis	Included
	Other genitourinary diseases	Q621	Atresia and stenosis of ureter	Included
	Other genitourinary diseases	Q622	Congenital megaloureter	Included
	Other genitourinary diseases	Q623	Other obstructive defects of renal pelvis and ureter	Included
	Other genitourinary diseases	Q624	Agenesis of ureter	Included
	Other genitourinary diseases	Q627	Congenital vesico-uretero-renal reflux	Included
	Other genitourinary diseases	Q628	Other congenital malformations of ureter	Included
	Other genitourinary diseases	Q638	Other specified congenital malformations of kidney	Included
	Other genitourinary diseases	Q639	Congenital malformation of kidney, unspecified	Included
	Other genitourinary diseases	Q640	Epispadias	Included
	Other genitourinary diseases	Q641	Exstrophy of urinary bladder	Included
	Other genitourinary diseases	Q643	Other atresia and stenosis of urethra and bladder neck	Included
	Other genitourinary diseases	Q644	Malformation of urachus	Included
	Other genitourinary diseases	Q645	Congenital absence of bladder and urethra	Included
	Other genitourinary diseases	Q646	Congenital diverticulum of bladder	Included
	Other genitourinary diseases	Q647	Other congenital malformations of bladder and urethra	Included
	Other genitourinary diseases	Q648	Other specified congenital malformations of urinary system	Included
	Other genitourinary diseases	Q649	Congenital malformation of urinary system, unspecified	Included
	Other genitourinary diseases	Z906	Acquired absence of other organs of urinary tract	Included
	Other genitourinary diseases	Z907	Acquired absence of genital organ(s)	Included
	Other genitourinary diseases	Z960	Presence of urogenital implants	Included
	Other metabolic diseases	E20	Hypoparathyroidism	Included
	Other metabolic diseases	E21	Hyperparathyroidism and other disorders of parathyroid gland	Included
	Other metabolic diseases	E22	Hyperfunction of pituitary gland	Included
	Other metabolic diseases	E23	Hypofunction and other disorders of pituitary gland	Included
	Other metabolic diseases	E24	Cushing syndrome	Included
	Other metabolic diseases	E25	Adrenogenital disorders	Included
	Other metabolic diseases	E26	Hyperaldosteronism	Included
	Other metabolic diseases	E27	Other disorders of adrenal gland	Included
	Other metabolic diseases	E28	Ovarian dysfunction	Included
	Other metabolic diseases	E29	Testicular dysfunction	Included
	Other metabolic diseases	E31	Polyglandular dysfunction	Included
	Other metabolic diseases	E34	Other endocrine disorders	Included
	Other metabolic diseases	E35	Disorders of endocrine glands in diseases classified elsewhere	Included
	Other metabolic diseases	E40	Kwashiorkor	Included
	Other metabolic diseases	E41	Nutritional marasmus	Included
	Other metabolic diseases	E42	Marasmic kwashiorkor	Included
	Other metabolic diseases	E43	Unspecified severe protein-energy malnutrition	Included
	Other metabolic diseases	E44	Protein-energy malnutrition of moderate and mild degree	Included
	Other metabolic diseases	E45	Retarded development following protein-energy malnutrition	Included
	Other metabolic diseases	E46	Unspecified protein-energy malnutrition	Included
	Other metabolic diseases	E64	Sequelae of malnutrition and other nutritional deficiencies	Included
	Other metabolic diseases	E70	Disorders of aromatic amino-acid metabolism	Included
	Other metabolic diseases	E71	Disorders of branched-chain amino-acid metabolism and fatty-acid metabolism	Included
	Other metabolic diseases	E72	Other disorders of amino-acid metabolism	Included
	Other metabolic diseases	E74	Other disorders of carbohydrate metabolism	Included
	Other metabolic diseases	E75	Disorders of sphingolipid metabolism and other lipid storage disorders	Included
	Other metabolic diseases	E76	Disorders of glycosaminoglycan metabolism	Included
	Other metabolic diseases	E77	Disorders of glycoprotein metabolism	Included
	Other metabolic diseases	E79	Disorders of purine and pyrimidine metabolism	Included
	Other metabolic diseases	E80	Disorders of porphyrin and bilirubin metabolism	Included
	Other metabolic diseases	E83	Disorders of mineral metabolism	Included
	Other metabolic diseases	E84	Cystic fibrosis	Included
	Other metabolic diseases	E85	Amyloidosis	Included
	Other metabolic diseases	E88	Other metabolic disorders	Included
	Other metabolic diseases	E89	Postprocedural endocrine and metabolic disorders, not elsewhere classified	Included
	Other metabolic diseases	K903	Pancreatic steatorrhoea	Included
	Other metabolic diseases	K904	Malabsorption due to intolerance, not elsewhere classified	Included
	Other metabolic diseases	K908	Other intestinal malabsorption	Included
	Other metabolic diseases	K909	Intestinal malabsorption, unspecified	Included
	Other metabolic diseases	K912	Postsurgical malabsorption, not elsewhere classified	Included
	Other metabolic diseases	M83	Adult osteomalacia	Included
	Other metabolic diseases	M88	Paget disease of bone [osteitis deformans]	Included
	Other metabolic diseases	N25	Disorders resulting from impaired renal tubular function	Included
	Other musculoskeletal and joint diseases	B902	Sequelae of tuberculosis of bones and joints	Included
	Other musculoskeletal and joint diseases	M212	Flexion deformity	Included
	Other musculoskeletal and joint diseases	M213	Wrist or foot drop (acquired)	Included
	Other musculoskeletal and joint diseases	M214	Flat foot [pes planus] (acquired)	Included
	Other musculoskeletal and joint diseases	M215	Acquired clawhand, clubhand, clawfoot and clubfoot	Included
	Other musculoskeletal and joint diseases	M216	Other acquired deformities of ankle and foot	Included
	Other musculoskeletal and joint diseases	M217	Unequal limb length (acquired)	Included
	Other musculoskeletal and joint diseases	M218	Other specified acquired deformities of limbs	Included
	Other musculoskeletal and joint diseases	M219	Acquired deformity of limb, unspecified	Included
	Other musculoskeletal and joint diseases	M22	Disorders of patella	Included
	Other musculoskeletal and joint diseases	M23	Internal derangement of knee	Included
	Other musculoskeletal and joint diseases	M24	Other specific joint derangements	Included
	Other musculoskeletal and joint diseases	M252	Flail joint	Included
	Other musculoskeletal and joint diseases	M253	Other instability of joint	Included
	Other musculoskeletal and joint diseases	M357	Hypermobility syndrome	Included
	Other musculoskeletal and joint diseases	M61	Calcification and ossification of muscle	Included
	Other musculoskeletal and joint diseases	M652	Calcific tendinitis	Included
	Other musculoskeletal and joint diseases	M653	Trigger finger	Included
	Other musculoskeletal and joint diseases	M654	Radial styloid tenosynovitis [de Quervain]	Included
	Other musculoskeletal and joint diseases	M700	Chronic crepitant synovitis of hand and wrist	Included
	Other musculoskeletal and joint diseases	M720	Palmar fascial fibromatosis [Dupuytren]	Included
	Other musculoskeletal and joint diseases	M722	Plantar fascial fibromatosis	Included
	Other musculoskeletal and joint diseases	M724	Pseudosarcomatous fibromatosis	Included
	Other musculoskeletal and joint diseases	M750	Adhesive capsulitis of shoulder	Included
	Other musculoskeletal and joint diseases	M751	Rotator cuff syndrome	Included
	Other musculoskeletal and joint diseases	M753	Calcific tendinitis of shoulder	Included
	Other musculoskeletal and joint diseases	M754	Impingement syndrome of shoulder	Included
	Other musculoskeletal and joint diseases	M797	Fibromyalgia	Included
	Other musculoskeletal and joint diseases	M841	Nonunion of fracture [pseudarthrosis]	Included
	Other musculoskeletal and joint diseases	M89	Other disorders of bone	Included
	Other musculoskeletal and joint diseases	M91	Juvenile osteochondrosis of hip and pelvis	Included
	Other musculoskeletal and joint diseases	M93	Other osteochondropathies	Included
	Other musculoskeletal and joint diseases	M94	Other disorders of cartilage	Included
	Other musculoskeletal and joint diseases	M96	Postprocedural musculoskeletal disorders, not elsewhere classified	Included
	Other musculoskeletal and joint diseases	M99	Biomechanical lesions, not elsewhere classified	Included
	Other musculoskeletal and joint diseases	Q65	Congenital deformities of hip	Included
	Other musculoskeletal and joint diseases	Q66	Congenital deformities of feet	Included
	Other musculoskeletal and joint diseases	Q68	Other congenital musculoskeletal deformities	Included
	Other musculoskeletal and joint diseases	Q71	Reduction defects of upper limb	Included
	Other musculoskeletal and joint diseases	Q72	Reduction defects of lower limb	Included
	Other musculoskeletal and joint diseases	Q73	Reduction defects of unspecified limb	Included
	Other musculoskeletal and joint diseases	Q74	Other congenital malformations of limb(s)	Included
	Other musculoskeletal and joint diseases	Q77	Osteochondrodysplasia with defects of growth of tubular bones and spine	Included
	Other musculoskeletal and joint diseases	Q78	Other osteochondrodysplasias	Included
	Other musculoskeletal and joint diseases	Q796	Ehlers-Danlos syndrome	Included
	Other musculoskeletal and joint diseases	Q798	Other congenital malformations of musculoskeletal system	Included
	Other musculoskeletal and joint diseases	Q87	Other specified congenital malformation syndromes affecting multiple systems	Included
	Other musculoskeletal and joint diseases	S382	Traumatic amputation of external genital organs	Included
	Other musculoskeletal and joint diseases	S48	Traumatic amputation of shoulder and upper arm	Included
	Other musculoskeletal and joint diseases	S58	Traumatic amputation of forearm	Included
	Other musculoskeletal and joint diseases	S68	Traumatic amputation of wrist and hand	Included
	Other musculoskeletal and joint diseases	S78	Traumatic amputation of hip and thigh	Included
	Other musculoskeletal and joint diseases	S88	Traumatic amputation of lower leg	Included
	Other musculoskeletal and joint diseases	S98	Traumatic amputation of ankle and foot	Included
	Other musculoskeletal and joint diseases	T05	Traumatic amputations involving multiple body regions	Included
	Other musculoskeletal and joint diseases	T096	Traumatic amputation of trunk, level unspecified	Included
	Other musculoskeletal and joint diseases	T116	Traumatic amputation of upper limb, level unspecified	Included
	Other musculoskeletal and joint diseases	T136	Traumatic amputation of lower limb, level unspecified	Included
	Other musculoskeletal and joint diseases	T147	Crushing injury and traumatic amputation of unspecified body region	Included
	Other musculoskeletal and joint diseases	T90	Sequelae of injuries of head	Included
	Other musculoskeletal and joint diseases	T91	Sequelae of injuries of neck and trunk	Included
	Other musculoskeletal and joint diseases	T92	Sequelae of injuries of upper limb	Included
	Other musculoskeletal and joint diseases	T93	Sequelae of injuries of lower limb	Included
	Other musculoskeletal and joint diseases	T94	Sequelae of injuries involving multiple and unspecified body regions	Included
	Other musculoskeletal and joint diseases	T95	Sequelae of burns, corrosions and frostbite	Included
	Other musculoskeletal and joint diseases	T96	Sequelae of poisoning by drugs, medicaments and biological substances	Included
	Other musculoskeletal and joint diseases	T97	Sequelae of toxic effects of substances chiefly nonmedicinal as to source	Included
	Other musculoskeletal and joint diseases	T98	Sequelae of other and unspecified effects of external causes	Included
	Other musculoskeletal and joint diseases	Z440	Fitting and adjustment of artificial arm (complete)(partial)	Included
	Other musculoskeletal and joint diseases	Z441	Fitting and adjustment of artificial leg (complete)(partial)	Included
	Other musculoskeletal and joint diseases	Z891	Acquired absence of hand and wrist	Included
	Other musculoskeletal and joint diseases	Z892	Acquired absence of upper limb above wrist	Included
	Other musculoskeletal and joint diseases	Z893	Acquired absence of both upper limbs [any level]	Included
	Other musculoskeletal and joint diseases	Z894	Acquired absence of foot and ankle	Included
	Other musculoskeletal and joint diseases	Z895	Acquired absence of leg at or below knee	Included
	Other musculoskeletal and joint diseases	Z896	Acquired absence of leg above knee	Included
	Other musculoskeletal and joint diseases	Z897	Acquired absence of both lower limbs [any level, except toes alone]	Included
	Other musculoskeletal and joint diseases	Z898	Acquired absence of upper and lower limbs [any level]	Included
	Other musculoskeletal and joint diseases	Z899	Acquired absence of limb, unspecified	Included
	Other musculoskeletal and joint diseases	Z946	Bone transplant status	Included
	Other musculoskeletal and joint diseases	Z966	Presence of orthopaedic joint implants	Included
	Other musculoskeletal and joint diseases	Z971	Presence of artificial limb (complete)(partial)	Included
	Other neurological diseases	B900	Sequelae of central nervous system tuberculosis	Included
	Other neurological diseases	D482	Neoplasm of uncertain or unknown behaviour: Peripheral nerves and autonomic nervous system	Included
	Other neurological diseases	G041	Tropical spastic paraplegia	Included
	Other neurological diseases	G09	Sequelae of inflammatory diseases of central nervous system	Included
	Other neurological diseases	G10	Huntington disease	Included
	Other neurological diseases	G11	Hereditary ataxia	Included
	Other neurological diseases	G12	Spinal muscular atrophy and related syndromes	Included
	Other neurological diseases	G13	Systemic atrophies primarily affecting central nervous system in diseases classified elsewhere	Included
	Other neurological diseases	G24	Dystonia	Included
	Other neurological diseases	G25	Other extrapyramidal and movement disorders	Included
	Other neurological diseases	G26	Extrapyramidal and movement disorders in diseases classified elsewhere	Included
	Other neurological diseases	G32	Other degenerative disorders of nervous system in diseases classified elsewhere	Included
	Other neurological diseases	G37	Other demyelinating diseases of central nervous system	Included
	Other neurological diseases	G51	Facial nerve disorders	Included
	Other neurological diseases	G52	Disorders of other cranial nerves	Included
	Other neurological diseases	G53	Cranial nerve disorders in diseases classified elsewhere	Included
	Other neurological diseases	G70	Myasthenia gravis and other myoneural disorders	Included
	Other neurological diseases	G71	Primary disorders of muscles	Included
	Other neurological diseases	G723	Periodic paralysis	Included
	Other neurological diseases	G724	Inflammatory myopathy, not elsewhere classified	Included
	Other neurological diseases	G728	Other specified myopathies	Included
	Other neurological diseases	G729	Myopathy, unspecified	Included
	Other neurological diseases	G73	Disorders of myoneural junction and muscle in diseases classified elsewhere	Included
	Other neurological diseases	G80	Cerebral palsy	Included
	Other neurological diseases	G81	Hemiplegia	Included
	Other neurological diseases	G82	Paraplegia and tetraplegia	Included
	Other neurological diseases	G83	Other paralytic syndromes	Included
	Other neurological diseases	G90	Disorders of autonomic nervous system	Included
	Other neurological diseases	G91	Hydrocephalus	Included
	Other neurological diseases	G938	Other specified disorders of brain	Included
	Other neurological diseases	G939	Disorder of brain, unspecified	Included
	Other neurological diseases	G95	Other diseases of spinal cord	Included
	Other neurological diseases	G99	Other disorders of nervous system in diseases classified elsewhere	Included
	Other neurological diseases	M471	Other spondylosis with myelopathy	Included
	Other neurological diseases	Q00	Anencephaly and similar malformations	Included
	Other neurological diseases	Q01	Encephalocele	Included
	Other neurological diseases	Q02	Microcephaly	Included
	Other neurological diseases	Q03	Congenital hydrocephalus	Included
	Other neurological diseases	Q04	Other congenital malformations of brain	Included
	Other neurological diseases	Q05	Spina bifida	Included
	Other neurological diseases	Q06	Other congenital malformations of spinal cord	Included
	Other neurological diseases	Q07	Other congenital malformations of nervous system	Included
	Other neurological diseases	Q760	Spina bifida occulta	Included
	Other psychiatric and behavioral diseases	F04	Organic amnesic syndrome, not induced by alcohol and other psychoactive substances	Included
	Other psychiatric and behavioral diseases	F06	Other mental disorders due to brain damage and dysfunction and to physical disease	Included
	Other psychiatric and behavioral diseases	F07	Personality and behavioural disorders due to brain disease, damage and dysfunction	Included
	Other psychiatric and behavioral diseases	F09	Unspecified organic or symptomatic mental disorder	Included
	Other psychiatric and behavioral diseases	F102	Mental and behavioural disorders due to use of alcohol: Dependence syndrome	Included
	Other psychiatric and behavioral diseases	F106	Mental and behavioural disorders due to use of alcohol: Amnesic syndrome	Included
	Other psychiatric and behavioral diseases	F107	Mental and behavioural disorders due to use of alcohol: Residual and late-onset psychotic disorder	Included
	Other psychiatric and behavioral diseases	F112	Mental and behavioural disorders due to use of opioids: Dependence syndrome	Included
	Other psychiatric and behavioral diseases	F116	Mental and behavioural disorders due to use of opioids: Amnesic syndrome	Included
	Other psychiatric and behavioral diseases	F117	Mental and behavioural disorders due to use of opioids: Residual and late-onset psychotic disorder	Included
	Other psychiatric and behavioral diseases	F122	Mental and behavioural disorders due to use of cannabinoids: Dependence syndrome	Included
	Other psychiatric and behavioral diseases	F126	Mental and behavioural disorders due to use of cannabinoids: Amnesic syndrome	Included
	Other psychiatric and behavioral diseases	F127	Mental and behavioural disorders due to use of cannabinoids: Residual and late-onset psychotic disorder	Included
	Other psychiatric and behavioral diseases	F132	Mental and behavioural disorders due to use of sedatives or hypnotics: Dependence syndrome	Included
	Other psychiatric and behavioral diseases	F136	Mental and behavioural disorders due to use of sedatives or hypnotics: Amnesic syndrome	Included
	Other psychiatric and behavioral diseases	F137	Mental and behavioural disorders due to use of sedatives or hypnotics: Residual and late-onset psychotic disorder	Included
	Other psychiatric and behavioral diseases	F142	Mental and behavioural disorders due to use of cocaine: Dependence syndrome	Included
	Other psychiatric and behavioral diseases	F146	Mental and behavioural disorders due to use of cocaine: Amnesic syndrome	Included
	Other psychiatric and behavioral diseases	F147	Mental and behavioural disorders due to use of cocaine: Residual and late-onset psychotic disorder	Included
	Other psychiatric and behavioral diseases	F152	Mental and behavioural disorders due to use of other stimulants, including caffeine: Dependence syndrome	Included
	Other psychiatric and behavioral diseases	F156	Mental and behavioural disorders due to use of other stimulants, including caffeine: Amnesic syndrome	Included
	Other psychiatric and behavioral diseases	F157	Mental and behavioural disorders due to use of other stimulants, including caffeine: Residual and late-onset psychotic disorder	Included
	Other psychiatric and behavioral diseases	F162	Mental and behavioural disorders due to use of hallucinogens: Dependence syndrome	Included
	Other psychiatric and behavioral diseases	F166	Mental and behavioural disorders due to use of hallucinogens: Amnesic syndrome	Included
	Other psychiatric and behavioral diseases	F167	Mental and behavioural disorders due to use of hallucinogens: Residual and late-onset psychotic disorder	Included
	Other psychiatric and behavioral diseases	F172	Mental and behavioural disorders due to use of tobacco: Dependence syndrome	Included
	Other psychiatric and behavioral diseases	F176	Mental and behavioural disorders due to use of tobacco: Amnesic syndrome	Included
	Other psychiatric and behavioral diseases	F177	Mental and behavioural disorders due to use of tobacco: Residual and late-onset psychotic disorder	Included
	Other psychiatric and behavioral diseases	F182	Mental and behavioural disorders due to use of volatile solvents: Dependence syndrome	Included
	Other psychiatric and behavioral diseases	F186	Mental and behavioural disorders due to use of volatile solvents: Amnesic syndrome	Included
	Other psychiatric and behavioral diseases	F187	Mental and behavioural disorders due to use of volatile solvents: Residual and late-onset psychotic disorder	Included
	Other psychiatric and behavioral diseases	F192	Mental and behavioural disorders due to multiple drug use and use of other psychoactive substances: Dependence syndrome	Included
	Other psychiatric and behavioral diseases	F196	Mental and behavioural disorders due to multiple drug use and use of other psychoactive substances: Amnesic syndrome	Included
	Other psychiatric and behavioral diseases	F197	Mental and behavioural disorders due to multiple drug use and use of other psychoactive substances: Residual and late-onset psychotic disorder	Included
	Other psychiatric and behavioral diseases	F50	Eating disorders	Included
	Other psychiatric and behavioral diseases	F52	Sexual dysfunction, not caused by organic disorder or disease	Included
	Other psychiatric and behavioral diseases	F60	Specific personality disorders	Included
	Other psychiatric and behavioral diseases	F61	Mixed and other personality disorders	Included
	Other psychiatric and behavioral diseases	F62	Enduring personality changes, not attributable to brain damage and disease	Included
	Other psychiatric and behavioral diseases	F63	Habit and impulse disorders	Included
	Other psychiatric and behavioral diseases	F68	Other disorders of adult personality and behaviour	Included
	Other psychiatric and behavioral diseases	F70	Mild mental retardation	Included
	Other psychiatric and behavioral diseases	F71	Moderate mental retardation	Included
	Other psychiatric and behavioral diseases	F72	Severe mental retardation	Included
	Other psychiatric and behavioral diseases	F73	Profound mental retardation	Included
	Other psychiatric and behavioral diseases	F78	Other mental retardation	Included
	Other psychiatric and behavioral diseases	F79	Unspecified mental retardation	Included
	Other psychiatric and behavioral diseases	F80	Specific developmental disorders of speech and language	Included
	Other psychiatric and behavioral diseases	F81	Specific developmental disorders of scholastic skills	Included
	Other psychiatric and behavioral diseases	F82	Specific developmental disorder of motor function	Included
	Other psychiatric and behavioral diseases	F83	Mixed specific developmental disorders	Included
	Other psychiatric and behavioral diseases	F84	Pervasive developmental disorders	Included
	Other psychiatric and behavioral diseases	F88	Other disorders of psychological development	Included
	Other psychiatric and behavioral diseases	F89	Unspecified disorder of psychological development	Included
	Other psychiatric and behavioral diseases	F95	Tic disorders	Included
	Other psychiatric and behavioral diseases	F99	Mental disorder, not otherwise specified	Included
	Other respiratory diseases	B909	Sequelae of respiratory and unspecified tuberculosis	Included
	Other respiratory diseases	E662	Extreme obesity with alveolar hypoventilation	Included
	Other respiratory diseases	J60	Coalworker pneumoconiosis	Included
	Other respiratory diseases	J61	Pneumoconiosis due to asbestos and other mineral fibres	Included
	Other respiratory diseases	J62	Pneumoconiosis due to dust containing silica	Included
	Other respiratory diseases	J63	Pneumoconiosis due to other inorganic dusts	Included
	Other respiratory diseases	J64	Unspecified pneumoconiosis	Included
	Other respiratory diseases	J65	Pneumoconiosis associated with tuberculosis	Included
	Other respiratory diseases	J66	Airway disease due to specific organic dust	Included
	Other respiratory diseases	J67	Hypersensitivity pneumonitis due to organic dust	Included
	Other respiratory diseases	J684	Chronic respiratory conditions due to chemicals, gases, fumes and vapours	Included
	Other respiratory diseases	J701	Chronic and other pulmonary manifestations due to radiation	Included
	Other respiratory diseases	J703	Chronic drug-induced interstitial lung disorders	Included
	Other respiratory diseases	J704	Drug-induced interstitial lung disorders, unspecified	Included
	Other respiratory diseases	J84	Other interstitial pulmonary diseases	Included
	Other respiratory diseases	J92	Pleural plaque	Included
	Other respiratory diseases	J941	Fibrothorax	Included
	Other respiratory diseases	J953	Chronic pulmonary insufficiency following surgery	Included
	Other respiratory diseases	J955	Postprocedural subglottic stenosis	Included
	Other respiratory diseases	J961	Chronic respiratory failure	Included
	Other respiratory diseases	J98	Other respiratory disorders	Included
	Other respiratory diseases	Q33	Congenital malformations of lung	Included
	Other respiratory diseases	Q34	Other congenital malformations of respiratory system	Included
	Other respiratory diseases	Z902	Acquired absence of lung [part of]	Included
	Other respiratory diseases	Z942	Lung transplant status	Included
	Other respiratory diseases	Z943	Heart and lungs transplant status	Included
	Other respiratory diseases	Z963	Presence of artificial larynx	Included
	Other skin diseases	L13	Other bullous disorders	Included
	Other skin diseases	L28	Lichen simplex chronicus and prurigo	Included
	Other skin diseases	L301	Dyshidrosis [pompholyx]	Included
	Other skin diseases	L43	Lichen planus	Included
	Other skin diseases	L508	Other urticaria	Included
	Other skin diseases	L581	Chronic radiodermatitis	Included
	Other skin diseases	L85	Other epidermal thickening	Included
	Other skin diseases	Q80	Congenital ichthyosis	Included
	Other skin diseases	Q81	Epidermolysis bullosa	Included
	Other skin diseases	Q821	Xeroderma pigmentosum	Included
	Other skin diseases	Q822	Mastocytosis	Included
	Other skin diseases	Q829	Congenital malformation of skin, unspecified	Included
	Parkinson and Parkinsonism	G20	Parkinson disease	Included
	Parkinson and Parkinsonism	G21	Secondary parkinsonism	Included
	Parkinson and Parkinsonism	G22	Parkinsonism in diseases classified elsewhere	Included
	Parkinson and Parkinsonism	G23	Other degenerative diseases of basal ganglia	Included
	Peripheral neuropathy	B91	Sequelae of poliomyelitis	Included
	Peripheral neuropathy	G14	Postpolio syndrome	Included
	Peripheral neuropathy	G54	Nerve root and plexus disorders	Included
	Peripheral neuropathy	G55	Nerve root and plexus compressions in diseases classified elsewhere	Included
	Peripheral neuropathy	G56	Mononeuropathies of upper limb	Included
	Peripheral neuropathy	G57	Mononeuropathies of lower limb	Included
	Peripheral neuropathy	G58	Other mononeuropathies	Included
	Peripheral neuropathy	G59	Mononeuropathy in diseases classified elsewhere	Included
	Peripheral neuropathy	G60	Hereditary and idiopathic neuropathy	Included
	Peripheral neuropathy	G628	Other specified polyneuropathies	Included
	Peripheral neuropathy	G629	Polyneuropathy, unspecified	Included
	Peripheral neuropathy	G63	Polyneuropathy in diseases classified elsewhere	Included
	Peripheral neuropathy	M472	Other spondylosis with radiculopathy	Included
	Peripheral neuropathy	M531	Cervicobrachial syndrome	Included
	Peripheral neuropathy	M541	Radiculopathy	Included
	Peripheral vascular disease	I702	Atherosclerosis of arteries of extremities	Included
	Peripheral vascular disease	I73	Other peripheral vascular diseases	Included
	Peripheral vascular disease	I792	Peripheral angiopathy in diseases classified elsewhere	Included
	Peripheral vascular disease	I798	Other disorders of arteries, arterioles and capillaries in diseases classified elsewhere	Included
	Prostate diseases	N40	Hyperplasia of prostate	Included
	Prostate diseases	N411	Chronic prostatitis	Included
	Prostate diseases	N418	Other inflammatory diseases of prostate	Included
	Schizophrenia and delusional diseases	F20	Schizophrenia	Included
	Schizophrenia and delusional diseases	F22	Persistent delusional disorders	Included
	Schizophrenia and delusional diseases	F24	Induced delusional disorder	Included
	Schizophrenia and delusional diseases	F25	Schizoaffective disorders	Included
	Schizophrenia and delusional diseases	F28	Other nonorganic psychotic disorders	Included
	Sleep disorders	F510	Nonorganic insomnia	Included
	Sleep disorders	F511	Nonorganic hypersomnia	Included
	Sleep disorders	F512	Nonorganic disorder of the sleep-wake schedule	Included
	Sleep disorders	F513	Sleepwalking [somnambulism]	Included
	Sleep disorders	G47	Sleep disorders	Included
	Solid neoplasms	C	Malignant neoplasms	Included
	Solid neoplasms	D00	Carcinoma in situ of oral cavity, oesophagus and stomach	Included
	Solid neoplasms	D01	Carcinoma in situ of other and unspecified digestive organs	Included
	Solid neoplasms	D02	Carcinoma in situ of middle ear and respiratory system	Included
	Solid neoplasms	D03	Melanoma in situ	Included
	Solid neoplasms	D04	Carcinoma in situ of skin	Included
	Solid neoplasms	D05	Carcinoma in situ of breast	Included
	Solid neoplasms	D06	Carcinoma in situ of cervix uteri	Included
	Solid neoplasms	D07	Carcinoma in situ of other and unspecified genital organs	Included
	Solid neoplasms	D09	Carcinoma in situ of other and unspecified sites	Included
	Solid neoplasms	D320	Benign neoplasm: Cerebral meninges	Included
	Solid neoplasms	D321	Benign neoplasm: Spinal meninges	Included
	Solid neoplasms	D329	Benign neoplasm: Meninges, unspecified	Included
	Solid neoplasms	D330	Benign neoplasm: Brain, supratentorial	Included
	Solid neoplasms	D331	Benign neoplasm: Brain, infratentorial	Included
	Solid neoplasms	D332	Benign neoplasm: Brain, unspecified	Included
	Solid neoplasms	D333	Benign neoplasm: Cranial nerves	Included
	Solid neoplasms	D334	Benign neoplasm: Spinal cord	Included
	Solid neoplasms	Q85	Phakomatoses, not elsewhere classified	Included
	Thyroid diseases	E00	Congenital iodine-deficiency syndrome	Included
	Thyroid diseases	E01	Iodine-deficiency-related thyroid disorders and allied conditions	Included
	Thyroid diseases	E02	Subclinical iodine-deficiency hypothyroidism	Included
	Thyroid diseases	E03	Other hypothyroidism	Included
	Thyroid diseases	E05	Thyrotoxicosis [hyperthyroidism]	Included
	Thyroid diseases	E062	Chronic thyroiditis with transient thyrotoxicosis	Included
	Thyroid diseases	E063	Autoimmune thyroiditis	Included
	Thyroid diseases	E065	Other chronic thyroiditis	Included
	Thyroid diseases	E07	Other disorders of thyroid	Included
	Thyroid diseases	E350	Disorders of thyroid gland in diseases classified elsewhere	Included
	Thyroid diseases	E890	Postprocedural hypothyroidism	Included
	Venous and lymphatic diseases	I780	Hereditary haemorrhagic telangiectasia	Included
	Venous and lymphatic diseases	I83	Varicose veins of lower extremities	Included
	Venous and lymphatic diseases	I87	Other disorders of veins	Included
	Venous and lymphatic diseases	I89	Other noninfective disorders of lymphatic vessels and lymph nodes	Included
	Venous and lymphatic diseases	I972	Postmastectomy lymphoedema syndrome	Included
	Venous and lymphatic diseases	Q820	Hereditary lymphoedema	Included
	Anemia	D563	Thalassaemia trait	Excluded
	Anemia	D590	Drug-induced autoimmune haemolytic anaemia	Excluded
	Anemia	D592	Drug-induced nonautoimmune haemolytic anaemia	Excluded
	Anemia	D593	Haemolytic-uraemic syndrome	Excluded
	Anemia	D596	Haemoglobinuria due to haemolysis from other external causes	Excluded
	Anemia	D601	Transient acquired pure red cell aplasia	Excluded
	Anemia	D611	Drug-induced aplastic anaemia	Excluded
	Anemia	D612	Aplastic anaemia due to other external agents	Excluded
	Anemia	D642	Secondary sideroblastic anaemia due to drugs and toxins	Excluded
	Autoimmune diseases	L105	Drug-induced pemphigus	Excluded
	Autoimmune diseases	M320	Drug-induced systemic lupus erythematosus	Excluded
	Autoimmune diseases	M342	Systemic sclerosis induced by drugs and chemicals	Excluded
	Autoimmune diseases	M357	Hypermobility syndrome	Excluded
	Autoimmune diseases	M358	Other specified systemic involvement of connective tissue	Excluded
	Autoimmune diseases	M359	Systemic involvement of connective tissue, unspecified	Excluded
	Autoimmune diseases	M360	Dermato(poly)myositis in neoplastic disease	Excluded
	Autoimmune diseases	M361	Arthropathy in neoplastic disease	Excluded
	Autoimmune diseases	M362	Haemophilic arthropathy	Excluded
	Autoimmune diseases	M363	Arthropathy in other blood disorders	Excluded
	Blindness, Visual impairment	H543	Mild or no visual impairment, binocular	Excluded
	Blood and blood forming organ diseases	D683	Haemorrhagic disorder due to circulating anticoagulants	Excluded
	Blood and blood forming organ diseases	D684	Acquired coagulation factor deficiency	Excluded
	Blood and blood forming organ diseases	D695	Secondary thrombocytopenia	Excluded
	Blood and blood forming organ diseases	D748	Other methaemoglobinaemias	Excluded
	Blood and blood forming organ diseases	D807	Transient hypogammaglobulinaemia of infancy	Excluded
	Blood and blood forming organ diseases	D891	Cryoglobulinaemia	Excluded
	Blood and blood forming organ diseases	D893	Immune reconstitution syndrome	Excluded
	Chronic liver diseases	K700	Alcoholic fatty liver	Excluded
	Chronic liver diseases	K701	Alcoholic hepatitis	Excluded
	Chronic pancreas, biliary tract and gallbladder diseases	K862	Cyst of pancreas	Excluded
	Chronic pancreas, biliary tract and gallbladder diseases	K863	Pseudocyst of pancreas	Excluded
	Chronic pancreas, biliary tract and gallbladder diseases	K869	Disease of pancreas, unspecified	Excluded
	Colitis and related diseases	K620	Anal polyp	Excluded
	Colitis and related diseases	K621	Rectal polyp	Excluded
	Colitis and related diseases	K625	Haemorrhage of anus and rectum	Excluded
	Colitis and related diseases	K626	Ulcer of anus and rectum	Excluded
	Colitis and related diseases	K645	Perianal venous thrombosis	Excluded
	Epilepsy	G405	Special epileptic syndromes	Excluded
	Neurotic, stress-related and somatoform diseases	F430	Acute stress reaction	Excluded
	Neurotic, stress-related and somatoform diseases	F432	Adjustment disorders	Excluded
	Other cardiovascular diseases	I091	Rheumatic diseases of endocardium, valve unspecified	Excluded
	Other cardiovascular diseases	I098	Other specified rheumatic heart diseases	Excluded
	Other cardiovascular diseases	I702	Atherosclerosis of arteries of extremities	Excluded
	Other eye diseases	H043	Acute and unspecified inflammation of lacrimal passages	Excluded
	Other eye diseases	H050	Acute inflammation of orbit	Excluded
	Other eye diseases	H470	Disorders of optic nerve, not elsewhere classified	Excluded
	Other eye diseases	H471	Papilloedema, unspecified	Excluded
	Other eye diseases	H481	Retrobulbar neuritis in diseases classified elsewhere	Excluded
	Other metabolic diseases	E231	Drug-induced hypopituitarism	Excluded
	Other metabolic diseases	E242	Drug-induced Cushing syndrome	Excluded
	Other metabolic diseases	E244	Alcohol-induced pseudo-Cushing syndrome	Excluded
	Other metabolic diseases	E273	Drug-induced adrenocortical insufficiency	Excluded
	Other metabolic diseases	E343	Short stature, not elsewhere classified	Excluded
	Other metabolic diseases	E344	Constitutional tall stature	Excluded
	Other metabolic diseases	E350	Disorders of thyroid gland in diseases classified elsewhere	Excluded
	Other metabolic diseases	E441	Mild protein-energy malnutrition	Excluded
	Other metabolic diseases	E790	Hyperuricaemia without signs of inflammatory arthritis and tophaceous disease	Excluded
	Other metabolic diseases	E804	Gilbert syndrome	Excluded
	Other metabolic diseases	E883	Tumour lysis syndrome	Excluded
	Other metabolic diseases	E890	Postprocedural hypothyroidism	Excluded
	Other metabolic diseases	E892	Postprocedural hypoparathyroidism	Excluded
	Other neurological diseases	G130	Paraneoplastic neuromyopathy and neuropathy	Excluded
	Other neurological diseases	G131	Other systemic atrophy primarily affecting central nervous system in neoplastic disease	Excluded
	Other neurological diseases	G251	Drug-induced tremor	Excluded
	Other neurological diseases	G254	Drug-induced chorea	Excluded
	Other neurological diseases	G256	Drug-induced tics and other tics of organic origin	Excluded
	Other neurological diseases	G510	Bell palsy	Excluded
	Other neurological diseases	G732	Other myasthenic syndromes in neoplastic disease	Excluded
	Other neurological diseases	G733	Myasthenic syndromes in other diseases classified elsewhere	Excluded
	Other neurological diseases	G734	Myopathy in infectious and parasitic diseases classified elsewhere	Excluded
	Other neurological diseases	G838	Other specified paralytic syndromes	Excluded
	Other respiratory diseases	J981	Pulmonary collapse	Excluded
	Other skin diseases	L432	Lichenoid drug reaction	Excluded
	Parkinson and Parkinsonism	G210	Malignant neuroleptic syndrome	Excluded
	Peripheral neuropathy	G631	Polyneuropathy in neoplastic disease	Excluded
	Peripheral vascular disease	I731	Thromboangiitis obliterans [Buerger]	Excluded
	Peripheral vascular disease	I738	Other specified peripheral vascular diseases	Excluded
	Solid neoplasms	C81	Hodgkin lymphoma	Excluded
	Solid neoplasms	C82	Follicular lymphoma	Excluded
	Solid neoplasms	C83	Non-follicular lymphoma	Excluded
	Solid neoplasms	C84	Mature T/NK-cell lymphomas	Excluded
	Solid neoplasms	C85	Other and unspecified types of non-Hodgkin lymphoma	Excluded
	Solid neoplasms	C86	Other specified types of T/NK-cell lymphoma	Excluded
	Solid neoplasms	C88	Malignant immunoproliferative diseases	Excluded
	Solid neoplasms	C90	Multiple myeloma and malignant plasma cell neoplasms	Excluded
	Solid neoplasms	C91	Lymphoid leukaemia	Excluded
	Solid neoplasms	C92	Myeloid leukaemia	Excluded
	Solid neoplasms	C93	Monocytic leukaemia	Excluded
	Solid neoplasms	C94	Other leukaemias of specified cell type	Excluded
	Solid neoplasms	C95	Leukaemia of unspecified cell type	Excluded
	Solid neoplasms	C96	Other and unspecified malignant neoplasms of lymphoid, haematopoietic and related tissue	Excluded
	Thyroid diseases	E035	Myxoedema coma	Excluded

## Sheet: S2
	Chronic disease	ICD-9	Labels	Inclusion
	Allergy	477	Allergic rhinitis	Included
	Allergy	493A	Asthma caused by allergic rhinitis	Included
	Allergy	691	Atopic dermatitis and related conditions	Included
	Allergy	692	Allergic contact dermatitis	Included
	Allergy	708A	Allergic urticaria	Included
	Allergy	V07B	Desensitization to allergens	Included
	Anemia	280	Iron deficiency anemia	Included
	Anemia	281	Other deficiency anemias	Included
	Anemia	282	Hereditary hemolytic anemias	Included
	Anemia	283	Acquired hemolytic anemias and other hemolytic anemias	Included
	Anemia	284	Aplastic anemia and other bone marrow failure syndromes	Included
	Anemia	285	Other and unspecified anemias	Included
	Asthma	493	Asthma	Included
	Atrial fibrillation	427D	Atrial fibrillation and flutter	Included
	Autoimmune diseases	279N	Autoimmune disease not classified elsewhere	Included
	Autoimmune diseases	443B	Thromboangitis obliterans (Buerger's disease)	Included
	Autoimmune diseases	446	Polyarteritis nodosa and related conditions	Included
	Autoimmune diseases	447G	Arteritis, unspecified	Included
	Autoimmune diseases	694F	Penfigoid	Included
	Autoimmune diseases	696	Psoriasis and related conditions	Included
	Autoimmune diseases	701A	Scleroderma	Included
	Autoimmune diseases	710	Systemic connective tissue diseases	Included
	Blindness, visual impairment	369	Blindness or severely impaired vision	Included
	Blindness, visual impairment	V43A	Fitting and adjustment of artificial eye	Included
	Blindness, visual impairment	V52C	Presence of artificial eye	Included
	Blood and blood forming organ diseases	135	Sarcoidosis	Included
	Blood and blood forming organ diseases	277W	Other specified disorders of metabolism	Included
	Blood and blood forming organ diseases	279J	Immunodeficiency affecting humoral immunity	Included
	Blood and blood forming organ diseases	279L	Other deficiencies affecting cell-mediated immunity	Included
	Blood and blood forming organ diseases	279M	Immunodeficiency, not specified	Included
	Blood and blood forming organ diseases	279X	Immunodeficiency syndrome, not specified	Included
	Blood and blood forming organ diseases	286	Coagulation defects	Included
	Blood and blood forming organ diseases	287	Purpura and other haemorrhagic conditions	Included
	Blood and blood forming organ diseases	288	Diseases of white blood cells	Included
	Blood and blood forming organ diseases	289E	Hypersplenism	Included
	Blood and blood forming organ diseases	289F	Other specified diseases of the spleen	Included
	Blood and blood forming organ diseases	289G	Hereditary polycythemia	Included
	Blood and blood forming organ diseases	289H	Methaemoglobinaemia	Included
	Blood and blood forming organ diseases	289W	Other specified diseases of blood and blood forming organs	Included
	Blood and blood forming organ diseases	289X	Other diseases of blood and blood forming organs, unspecified	Included
	Bradycardias and conduction diseases	426	Conduction disorders	Included
	Bradycardias and conduction diseases	V45A	Presence of cardiac pacemaker	Included
	Cardiac valve diseases	394	Mitral valve diseases	Included
	Cardiac valve diseases	395	Aortic valve diseases	Included
	Cardiac valve diseases	396	Diseases of both mitral and aortic valve	Included
	Cardiac valve diseases	397A	Tricuspid valve diseases	Included
	Cardiac valve diseases	397B	Rheumatic pulmonary valve diseases	Included
	Cardiac valve diseases	397X	Rheumatic valve disease, unspecified with regards to the valve	Included
	Cardiac valve diseases	398	Other chronic rheumatic heart disease	Included
	Cardiac valve diseases	424	Other diseases in the endocardium	Included
	Cardiac valve diseases	746	Other congenital heart defects	Included
	Cardiac valve diseases	V42C	Presence of prosthetic heart valve	Included
	Cardiac valve diseases	V43D	Presence of xenogenic heart valve	Included
	Cataract and other lens diseases	366	Cataract	Included
	Cataract and other lens diseases	379D	Absence of the lens and changes in the position of the lens	Included
	Cataract and other lens diseases	743D	Congenital lens malformations	Included
	Cataract and other lens diseases	V43B	Presence of intraocular lens	Included
	Cerebrovascular disease	430	Subarachnoid haemorrhage	Included
	Cerebrovascular disease	431	Intracerebral haemorrhage	Included
	Cerebrovascular disease	432	Other intracranial haemorrhage	Included
	Cerebrovascular disease	433	Occlusion and stenosis of the precerebral arteries	Included
	Cerebrovascular disease	434	Occlusion and stenosis of the cerebral arteries	Included
	Cerebrovascular disease	435	Transient cerebral ischemia	Included
	Cerebrovascular disease	436	Acute incompletely specified cerebrovascular disease	Included
	Cerebrovascular disease	437	Other incompletely specified cerebrovascular disease	Included
	Cerebrovascular disease	438	Sequelae of cerebrovascular disease	Included
	Chromosomal abnormalities	758	Chromosomal anomalies	Included
	Chronic infectious diseases	10	Primary tuberculosis infection	Included
	Chronic infectious diseases	11	Respiratory tuberculosis	Included
	Chronic infectious diseases	13	Tuberculosis of nervous system	Included
	Chronic infectious diseases	14	Tuberculosis in the intestines, abdominal cavity, and mesenteric lymph nodes	Included
	Chronic infectious diseases	15	Tuberculosis in the skeleton and joints	Included
	Chronic infectious diseases	16	Tuberculosis in the urinary and reproductive organs	Included
	Chronic infectious diseases	17	Tuberculosis of other organs	Included
	Chronic infectious diseases	18	Miliary tuberculosis	Included
	Chronic infectious diseases	30	Leprosy [Hansen disease]	Included
	Chronic infectious diseases	31	Infection due to other mycobacteria	Included
	Chronic infectious diseases	46	Atypical virus infections of central nervous system	Included
	Chronic infectious diseases	079J	Disease caused by human T-lymphotropic virus type III	Included
	Chronic infectious diseases	086B	Chagas disease with involvement of organs other than the heart	Included
	Chronic infectious diseases	086C	Chagas disease without information about organ involvement	Included
	Chronic infectious diseases	90	Congenital syphilis	Included
	Chronic infectious diseases	93	Syphilis in the cardiovascular system	Included
	Chronic infectious diseases	94	Syphilis in the nervous system	Included
	Chronic infectious diseases	95	Other forms of late syphilis with symptoms	Included
	Chronic infectious diseases	96	Late syphilis	Included
	Chronic infectious diseases	97	Other and unspecified syphilis	Included
	Chronic infectious diseases	102	Yaws	Included
	Chronic infectious diseases	103	Pinta	Included
	Chronic infectious diseases	104A	Other spirochete infections	Included
	Chronic infectious diseases	104W	Other spirochete infections	Included
	Chronic infectious diseases	114	Coccidioidomycosis	Included
	Chronic infectious diseases	115	Histoplasmosis	Included
	Chronic infectious diseases	116	Blastomycosis	Included
	Chronic infectious diseases	120	Schistosomiasis [bilharziasis]	Included
	Chronic infectious diseases	138	Late effects of polio	Included
	Chronic infectious diseases	139	Late effects of other infectious diseases and parasitic diseases	Included
	Chronic infectious diseases	279K	Aquired immune deficiency syndrome (AIDS)	Included
	Chronic infectious diseases	730B	Chronic osteomyelitis	Included
	Chronic kidney diseases	403A	Hypertensive chronic kidney disease, malignant, with chronic kidney disease	Included
	Chronic kidney diseases	404A	Hypertensive chronic kidney disease, malignant, with chronic kidney and cardiovascular disease	Included
	Chronic kidney diseases	404X	Hypertensive chronic kidney disease, unspecified, with chronic kidney and cardiovascular disease	Included
	Chronic kidney diseases	581	Nephrotic syndrome	Included
	Chronic kidney diseases	582	Chronic glomerulonephritis	Included
	Chronic kidney diseases	583	Nephritis and nephropathy, not specified as acute or chronic	Included
	Chronic kidney diseases	585	Chronic renal failure	Included
	Chronic kidney diseases	586	Renal failure, unspecified	Included
	Chronic kidney diseases	590A	Chronic pyelonephritis and chronic pyonephrosis	Included
	Chronic kidney diseases	593W	Other specified diseases of the kidney and urethra	Included
	Chronic kidney diseases	753A	Renal agenesis and dysgenesis	Included
	Chronic kidney diseases	753B	Cystic kidney disease	Included
	Chronic kidney diseases	753D	Other specified malformations of the kidney	Included
	Chronic kidney diseases	V42A	Kidney transplant status	Included
	Chronic liver diseases	70	Viral hepatitis	Included
	Chronic liver diseases	571	Chronic liver disease and liver cirrhosis	Included
	Chronic liver diseases	572D	Portal hypertension	Included
	Chronic liver diseases	572E	Hepatorenal syndrome	Included
	Chronic liver diseases	572W	Other sequalae of chronic liver disease	Included
	Chronic liver diseases	573A	Chronic passive congestion of liver	Included
	Chronic liver diseases	573B	Viral hepatitis, classified elsewhere	Included
	Chronic liver diseases	573D	Hepatitis, unspecified	Included
	Chronic liver diseases	573W	Other specified liver disease	Included
	Chronic liver diseases	751G	Cystic disease of liver	Included
	Chronic liver diseases	V42H	Liver transplant status	Included
	Chronic pancreas, biliary tract and gallbladder diseases	574A	Calculus of gallbladder with acute cholecystitis	Included
	Chronic pancreas, biliary tract and gallbladder diseases	574B	Calculus of gallbladder with other cholecystitis	Included
	Chronic pancreas, biliary tract and gallbladder diseases	574C	Calculus of gallbladder without cholecystitis	Included
	Chronic pancreas, biliary tract and gallbladder diseases	575B	Other cholecystitis	Included
	Chronic pancreas, biliary tract and gallbladder diseases	575W	Other specified diseases of the gallbladder	Included
	Chronic pancreas, biliary tract and gallbladder diseases	577W	Other specified diseases of the pancreas	Included
	Chronic pancreas, biliary tract and gallbladder diseases	751G	Congenital malformation of the gallbladder, bile ducts, and liver	Included
	Chronic pancreas, biliary tract and gallbladder diseases	751H	Congenital malformation of the pancreas	Included
	Chronic ulcer of the skin	454A	Varicose veins of lower extremities with ulcer	Included
	Chronic ulcer of the skin	454C	Varicose veins of lower extremities with both ulcer and inflammation	Included
	Chronic ulcer of the skin	707A	Decubitus ulcer	Included
	Chronic ulcer of the skin	707B	Ulcer of lower limb, not elsewhere classified	Included
	Chronic ulcer of the skin	707X	Chronic ulcer of skin, not elsewhere classified	Included
	Colitis and related diseases	455	Hemorrhoids	Included
	Colitis and related diseases	557B	Chronic vascular disorders of intestine	Included
	Colitis and related diseases	557X	Chronic vascular disorders of intestine, unspecified	Included
	Colitis and related diseases	558	Other specified noninfective gastroenteritis and colitis	Included
	Colitis and related diseases	562A	Diverticulitis and diverticulosis in the duodenum or small intestine	Included
	Colitis and related diseases	562B	Diverticulitis and diverticulosis in the colon	Included
	Colitis and related diseases	564A	Constipation	Included
	Colitis and related diseases	564B	Irritable bowel syndrome	Included
	Colitis and related diseases	564W	Other specified functional disorders in the intestine	Included
	Colitis and related diseases	569	Other diseases in the intestine	Included
	COPD, emphysema, chronic bronchitis	491	Chronic bronchitis	Included
	COPD, emphysema, chronic bronchitis	492	Emphysema	Included
	COPD, emphysema, chronic bronchitis	494	Bronchiectasis	Included
	Deafness, hearing impairment	387	Otosclerosis	Included
	Deafness, hearing impairment	388A	Degenerative and vascular diseases in the ear	Included
	Deafness, hearing impairment	389	Hearing loss	Included
	Deafness, hearing impairment	744A	Malformations of the ear that cause hearing loss	Included
	Deafness, hearing impairment	V53A	Adjustment and management of implanted hearing device	Included
	Deafness, hearing impairment	V53C	Fitting and adjustment of hearing aid	Included
	Dementia	290	Dementia in connection with aging	Included
	Dementia	294B	Dementia in connection with somatic conditions classified elsewhere	Included
	Dementia	331A	Presenile and senile degeneration of Alzheimer's type	Included
	Dementia	331B	Pick’s disease	Included
	Dementia	331W	Other specified cerebral degenerative disease	Included
	Depression and mood diseases	296	Affective psychosis	Included
	Depression and mood diseases	298A	Reactive depressive psychosis	Included
	Depression and mood diseases	300E	Neurotic depression	Included
	Depression and mood diseases	311	Depressive disorders not classified elsewhere	Included
	Diabetes	250	Diabetes	Included
	Diabetes	251D	Postprocedural hypoinsulinaemia	Included
	Dorsopathies	015A	Tuberculosis in the ribcage	Included
	Dorsopathies	721	Spondylosis and related dorsopathies	Included
	Dorsopathies	722	Intervertebral disc disorders	Included
	Dorsopathies	732A	Juvenile osteochondrosis in the spine	Included
	Dorsopathies	732W	Other specified osteochondropathies	Included
	Dorsopathies	737	Abnormal spinal curvature	Included
	Dorsopathies	738E	Acquired spondylolisthesis	Included
	Dorsopathies	738F	Other acquired deformity of the spine	Included
	Dorsopathies	754C	Congenital deformity of spine	Included
	Dorsopathies	756B	Congenital malformations of the spinal column	Included
	Dyslipidemia	272	Disorders of fat metabolism	Included
	Ear, nose, throat diseases	380C	Cholesteatoma and eczema of external ear	Included
	Ear, nose, throat diseases	382B	Chronic suppurative otosalpingitis	Included
	Ear, nose, throat diseases	382C	Chronic atticoantral suppurative otitis media	Included
	Ear, nose, throat diseases	382D	Other chronic suppurative otitis media	Included
	Ear, nose, throat diseases	383B	Chronic mastoiditis	Included
	Ear, nose, throat diseases	384B	Chronic myringitis	Included
	Ear, nose, throat diseases	385B	Adhesive middle ear disease	Included
	Ear, nose, throat diseases	385D	Cholesteatoma of middle ear	Included
	Ear, nose, throat diseases	386A	Meniere disease	Included
	Ear, nose, throat diseases	386E	Labyrinthine fistula	Included
	Ear, nose, throat diseases	386F	Labyrinthine dysfunction	Included
	Ear, nose, throat diseases	470	Deviated nasal septum	Included
	Ear, nose, throat diseases	471	Nasal polyp	Included
	Ear, nose, throat diseases	472	Chronic pharyngitis and nasopharyngitis	Included
	Ear, nose, throat diseases	473	Chronic sinusitis	Included
	Ear, nose, throat diseases	474	Chronic diseases of tonsils and adenoids	Included
	Ear, nose, throat diseases	476	Chronic laryngitis and laryngotracheitis	Included
	Ear, nose, throat diseases	477X	Vasomotor rhinitis	Included
	Ear, nose, throat diseases	478A	Hypertrophy of nasal turbinates	Included
	Ear, nose, throat diseases	478B	Other diseases in the nasal cavity and sinuses	Included
	Ear, nose, throat diseases	478D	Vocal cord paralysis	Included
	Ear, nose, throat diseases	478H	Other diseases in the larynx, not classified elsewhere	Included
	Ear, nose, throat diseases	523B	Chronic gingivitis	Included
	Ear, nose, throat diseases	523E	Chronic periodontitis	Included
	Ear, nose, throat diseases	527A	Atrophy of salivary gland	Included
	Ear, nose, throat diseases	527W	Other specified diseases in the salivary glands	Included
	Ear, nose, throat diseases	748A	Choanal atresia	Included
	Ear, nose, throat diseases	748B	Other congenital malformations of nose	Included
	Ear, nose, throat diseases	748C	Laryngeal membrane	Included
	Ear, nose, throat diseases	748D	Other congenital malformations of larynx, trachea och bronchus	Included
	Ear, nose, throat diseases	749	Cleft lip and cleft palate	Included
	Ear, nose, throat diseases	750	Other congenital malformations of tongue, mouth and pharynx	Included
	Epilepsy	345	Epilepsy	Included
	Esophagus, stomach and duodenum diseases	017W	Tuberculosis of other specified organs	Included
	Esophagus, stomach and duodenum diseases	456A	Oesophageal varices with bleeding	Included
	Esophagus, stomach and duodenum diseases	456B	Oesophageal varices without bleeding	Included
	Esophagus, stomach and duodenum diseases	456W	Other varices	Included
	Esophagus, stomach and duodenum diseases	530A	Achalasia of cardia	Included
	Esophagus, stomach and duodenum diseases	530B	Oesophagitis	Included
	Esophagus, stomach and duodenum diseases	530D	Oesophageal stricture and stenosis	Included
	Esophagus, stomach and duodenum diseases	530F	Dyskinesia of oesophagus	Included
	Esophagus, stomach and duodenum diseases	530G	Diverticulum of oesophagus, acquired	Included
	Esophagus, stomach and duodenum diseases	531E	Gastric ulcer: Chronic or unspecified with haemorrhage	Included
	Esophagus, stomach and duodenum diseases	531F	Gastric ulcer: Chronic or unspecified with perforation	Included
	Esophagus, stomach and duodenum diseases	531G	Gastric ulcer: Chronic or unspecified with both haemorrhage and perforation	Included
	Esophagus, stomach and duodenum diseases	531H	Gastric ulcer: Chronic without haemorrhage or perforation	Included
	Esophagus, stomach and duodenum diseases	532E	Duodenal ulcer: Chronic or unspecified with haemorrhage	Included
	Esophagus, stomach and duodenum diseases	532F	Duodenal ulcer: Chronic or unspecified with perforation	Included
	Esophagus, stomach and duodenum diseases	532G	Duodenal ulcer: Chronic or unspecified with both haemorrhage and perforation	Included
	Esophagus, stomach and duodenum diseases	532H	Duodenal ulcer: Chronic without haemorrhage or perforation	Included
	Esophagus, stomach and duodenum diseases	533E	Peptic ulcer, site unspecified: Chronic or unspecified with haemorrhage	Included
	Esophagus, stomach and duodenum diseases	533F	Peptic ulcer, site unspecified: Chronic or unspecified with perforation	Included
	Esophagus, stomach and duodenum diseases	533G	Peptic ulcer, site unspecified: Chronic or unspecified with both haemorrhage and perforation	Included
	Esophagus, stomach and duodenum diseases	533H	Peptic ulcer, site unspecified: Chronic without haemorrhage or perforation	Included
	Esophagus, stomach and duodenum diseases	534E	Gastrojejunal ulcer: Chronic or unspecified with haemorrhage	Included
	Esophagus, stomach and duodenum diseases	534F	Gastrojejunal ulcer: Chronic or unspecified with perforation	Included
	Esophagus, stomach and duodenum diseases	534G	Gastrojejunal ulcer: Chronic or unspecified with both haemorrhage and perforation	Included
	Esophagus, stomach and duodenum diseases	534H	Gastrojejunal ulcer: Chronic without haemorrhage or perforation	Included
	Esophagus, stomach and duodenum diseases	535B	Chronic atrophic gastritis	Included
	Esophagus, stomach and duodenum diseases	535E	Other gastritis	Included
	Esophagus, stomach and duodenum diseases	535F	Gastritis, unspecified	Included
	Esophagus, stomach and duodenum diseases	535G	Duodenitis	Included
	Esophagus, stomach and duodenum diseases	536W	Dyspepsia and other disorders	Included
	Esophagus, stomach and duodenum diseases	537A	Adult hypertrophic pyloric stenosis	Included
	Esophagus, stomach and duodenum diseases	537B	Gastric diverticulum	Included
	Esophagus, stomach and duodenum diseases	537W	Other specified disorders in the stomach and duodenum	Included
	Esophagus, stomach and duodenum diseases	564C	Disease conditions after stomach surgeries	Included
	Esophagus, stomach and duodenum diseases	750D	Tracheoesophageal fistula, esophageal atresia, and esophageal stenosis	Included
	Esophagus, stomach and duodenum diseases	750E	Other congenital malformations of oesophagus	Included
	Esophagus, stomach and duodenum diseases	750F	Congenital hypertrophic pyloric stenosis	Included
	Esophagus, stomach and duodenum diseases	750G	Congenital hiatus hernia	Included
	Esophagus, stomach and duodenum diseases	750H	Other specified malformations of stomach	Included
	Esophagus, stomach and duodenum diseases	750W	Other specified malformations of upper alimentary tract	Included
	Glaucoma	364C	Acute angle-closure glaucoma	Included
	Glaucoma	365	Glaucoma	Included
	Heart failure	392A	Rheumatic chorea with heart disease	Included
	Heart failure	398	Other chronic rheumatic heart disease	Included
	Heart failure	402	Hypertensive heart disease with (congestive) heart failure	Included
	Heart failure	404	Hypertensive heart and renal disease with both (congestive) heart failure and renal failure	Included
	Heart failure	416	Chronic disease conditions within the pulmonary circulation	Included
	Heart failure	417A	Arteriovenous fistula of pulmonary vessels	Included
	Heart failure	425	Cardiomyopathy	Included
	Heart failure	428	Heart failure	Included
	Heart failure	429B	Myocardial degeneration	Included
	Heart failure	429D	Cardiomegaly	Included
	Heart failure	V42B	Heart transplant status	Included
	Heart failure	V42W	Heart and lungs transplant status	Included
	Hematological neoplasms	201	Hodgkin lymphoma	Included
	Hematological neoplasms	202	Other malignant tumours in lymphoid and histiocytic tissue	Included
	Hematological neoplasms	203	Multiple myeloma and immunoproliferative tumors	Included
	Hematological neoplasms	204	Lymphoid leukaemia	Included
	Hematological neoplasms	205	Myeloid leukaemia	Included
	Hematological neoplasms	206	Monocytic leukaemia	Included
	Hematological neoplasms	207	Other leukaemias of specified cell type	Included
	Hematological neoplasms	208	Leukaemia of unspecified cell type	Included
	Hypertension	401	Essential (primary) hypertension	Included
	Hypertension	402	Hypertensive heart disease	Included
	Hypertension	403	Hypertensive renal disease	Included
	Hypertension	404	Hypertensive heart and renal disease	Included
	Hypertension	405	Secondary hypertension	Included
	Inflammatory arthropathies	274	Gout	Included
	Inflammatory arthropathies	711B	Arthritis or polyarthritis in connection with non-specific urethritis	Included
	Inflammatory arthropathies	712	Crystal arthropathies	Included
	Inflammatory arthropathies	713	Other crystal arthropathies	Included
	Inflammatory arthropathies	714	Rheumatoid arthritis and similar forms of inflammatory polyarthritis	Included
	Inflammatory arthropathies	716	Other specific arthropathies	Included
	Inflammatory arthropathies	719C	Villonodular synovitis	Included
	Inflammatory arthropathies	719D	Palindromic Rheumatism	Included
	Inflammatory arthropathies	720	Other specified inflammatory spondylopathies	Included
	Inflammatory bowel diseases	555	Regional enteritis	Included
	Inflammatory bowel diseases	556	Ulcerative colitis	Included
	Ischemic heart disease	410	Acute myocardial infarction	Included
	Ischemic heart disease	411	Other acute or subacute ischaemic heart diseases	Included
	Ischemic heart disease	412	Old myocardial infarction	Included
	Ischemic heart disease	413	Angina pectoris	Included
	Ischemic heart disease	414	Other chronic ischaemic heart disease	Included
	Ischemic heart disease	V43E	Presence of aortocoronary bypass graft	Included
	Migraine and facial pain syndromes	307W	Tension-type headache	Included
	Migraine and facial pain syndromes	346	Migraine	Included
	Migraine and facial pain syndromes	350	Disorders of trigeminal nerve	Included
	Migraine and facial pain syndromes	784A	Headache	Included
	Multiple sclerosis	340	Multiple sclerosis	Included
	Neurotic, stress-related and somatoform diseases	300	Neuroses	Included
	Neurotic, stress-related and somatoform diseases	306	Psychophysiological reaction	Included
	Neurotic, stress-related and somatoform diseases	309B	Delayed stress reaction	Included
	Obesity	278A	Obesity	Included
	Obesity	278B	Localized obesity	Included
	Osteoarthritis and other degenerative joint diseases	713C	Haemophilic arthropathy	Included
	Osteoarthritis and other degenerative joint diseases	713G	Arthropathy in other blood disorders	Included
	Osteoarthritis and other degenerative joint diseases	715	Arthrosis	Included
	Osteoarthritis and other degenerative joint diseases	733W	Pseudoarthrosis	Included
	Osteoporosis	733A	Osteoporosis	Included
	Other cardiovascular diseases	093A	Aortic aneurysm caused by syphilis	Included
	Other cardiovascular diseases	093B	Aortitis caused by syphilis	Included
	Other cardiovascular diseases	393	Chronic rheumatic pericarditis	Included
	Other cardiovascular diseases	417B	Aneurysm of pulmonary artery	Included
	Other cardiovascular diseases	423B	Chronic adhesive pericarditis	Included
	Other cardiovascular diseases	423C	Chronic constrictive pericarditis	Included
	Other cardiovascular diseases	426H	Abnormal atrioventricular excitation	Included
	Other cardiovascular diseases	427W	Other specified cardiac arrhythmias	Included
	Other cardiovascular diseases	440	Atherosclerosis	Included
	Other cardiovascular diseases	441	Aortic aneurysm	Included
	Other cardiovascular diseases	442	Other aneurysm	Included
	Other cardiovascular diseases	458A	Orthostatic hypotension	Included
	Other cardiovascular diseases	745	Malformations in the development of the heart and closure of the heart septum	Included
	Other cardiovascular diseases	746	Other malformations of the heart	Included
	Other cardiovascular diseases	747	Other congenital malformations of circulatory system	Included
	Other cardiovascular diseases	V43C	Presence of other cardiac and vascular implants and grafts	Included
	Other digestive diseases	14	Tuberculosis in the intestines, abdominal cavity, and mesenteric lymph nodes	Included
	Other digestive diseases	86B	Chagas disease with involvement of organs other than the heart	Included
	Other digestive diseases	564C	Postgastric surgery syndromes	Included
	Other digestive diseases	564D	Vomiting because of gastrointestinal surgical procedures	Included
	Other digestive diseases	564E	Other postoperative functional disorders	Included
	Other digestive diseases	568A	Peritoneal adhesions	Included
	Other digestive diseases	569W	Other specified disease in the intestine	Included
	Other digestive diseases	579A	Coeliac disease	Included
	Other digestive diseases	579B	Tropical sprue	Included
	Other digestive diseases	751A	Meckel’s diverticulum	Included
	Other digestive diseases	751B	Atresia and stenosis of the small intestine	Included
	Other digestive diseases	751C	Atresia and stenosis of the colon, rectum, and anus	Included
	Other digestive diseases	751D	Hirschsprung's disease and other congenital functional disorders	Included
	Other digestive diseases	751E	Malformation of the intestinal attachment	Included
	Other digestive diseases	751F	Other malformations of the intestine	Included
	Other digestive diseases	787G	Faecal incontinence	Included
	Other digestive diseases	V45D	Intestinal bypass and anastomosis status	Included
	Other eye diseases	017D	Tuberculosis of the eye	Included
	Other eye diseases	054E	Herpes simplex with eye complications	Included
	Other eye diseases	090D	Syphilitic interstitial keratitis	Included
	Other eye diseases	094W	Other specified neurosyphilis	Included
	Other eye diseases	361	Retinal detachment	Included
	Other eye diseases	362	Other disorders of retina	Included
	Other eye diseases	363D	Chorioretinal scars	Included
	Other eye diseases	363E	Choroidal degeneration	Included
	Other eye diseases	363F	Congenital choroidal dystrophy	Included
	Other eye diseases	363W	Other specified disorders of choroid	Included
	Other eye diseases	364	Disorders of iris and ciliary body	Included
	Other eye diseases	371	Corneal opacities	Included
	Other eye diseases	374F	Degenerative changes in the eyelids and periocular area	Included
	Other eye diseases	375	Disorders of lacrimal system	Included
	Other eye diseases	376	Disorders of orbit	Included
	Other eye diseases	377	Disorders of optic [2nd] nerve and visual pathways	Included
	Other eye diseases	378F	Paralytic strabismus	Included
	Other eye diseases	378H	Other forms of strabismus	Included
	Other eye diseases	378W	Other disturbances in binocular vision	Included
	Other eye diseases	378X	Strabismus and other disturbances in binocular vision, unspecified	Included
	Other eye diseases	743	Congenital malformation of eye	Included
	Other eye diseases	V42F	Corneal transplant status	Included
	Other genitourinary diseases	016B	Tuberculosis in other genitourinary organs	Included
	Other genitourinary diseases	137C	Late effects of tuberculosis in genitourinary organs	Included
	Other genitourinary diseases	274B	Gout with kidney symptoms	Included
	Other genitourinary diseases	592	Calculus of kidney with calculus of ureter	Included
	Other genitourinary diseases	593	Other diseases in the kidney and ureter	Included
	Other genitourinary diseases	594	Calculus of lower urinary tract	Included
	Other genitourinary diseases	595B	Interstitial cystitis (chronic)	Included
	Other genitourinary diseases	595C	Other chronic cystitis	Included
	Other genitourinary diseases	595D	Trigonitis	Included
	Other genitourinary diseases	595W	Other specified chronic cystitis	Included
	Other genitourinary diseases	596	Other disorders of bladder	Included
	Other genitourinary diseases	598	Urethral stricture	Included
	Other genitourinary diseases	599	Other diseases in the urethra (urinary canal) and urinary tract	Included
	Other genitourinary diseases	607A	Leukoplakia of penis	Included
	Other genitourinary diseases	607W	Other specified disorder of penis	Included
	Other genitourinary diseases	607X	Disorder of penis, unspecified	Included
	Other genitourinary diseases	614B	Chronic salpingitis and oophoritis	Included
	Other genitourinary diseases	614E	Chronic parametritis and pelvic cellulitis	Included
	Other genitourinary diseases	614G	Female pelvic peritoneal adhesions	Included
	Other genitourinary diseases	614H	Female chronic pelvic peritonitis	Included
	Other genitourinary diseases	615B	Chronic inflammatory disease of uterus	Included
	Other genitourinary diseases	616B	Chronic vaginitis and vulvovaginitis	Included
	Other genitourinary diseases	618	Female genital prolapse	Included
	Other genitourinary diseases	622	Noninflammatory disorders of cervix uteri	Included
	Other genitourinary diseases	623C	Stricture and atresia of vagina	Included
	Other genitourinary diseases	624B	Atrophy of vulva	Included
	Other genitourinary diseases	625G	Female stress incontinence	Included
	Other genitourinary diseases	627D	Postmenopausal atrophic vaginitis	Included
	Other genitourinary diseases	752G	Hypospadias and epispadias	Included
	Other genitourinary diseases	753	Congenital abnormalities of the urinary organs	Included
	Other genitourinary diseases	788D	Urinary incontinence	Included
	Other genitourinary diseases	V43F	Presence of urogenital implants	Included
	Other metabolic diseases	017G	Tuberculosis of adrenal glands	Included
	Other metabolic diseases	036D	Waterhouse-Friderichsen's syndrome caused by meningococcus	Included
	Other metabolic diseases	040C	Whipple disease	Included
	Other metabolic diseases	252	Disorders of the parathyroid gland	Included
	Other metabolic diseases	253	Disorders of the pituitary gland and its hypothalamic control	Included
	Other metabolic diseases	255	Disorders of adrenal gland	Included
	Other metabolic diseases	256	Ovarian dysfunction	Included
	Other metabolic diseases	257	Testicular dysfunction	Included
	Other metabolic diseases	258	Polyglandular dysfunction	Included
	Other metabolic diseases	259	Other endocrine disorders	Included
	Other metabolic diseases	260	Kwashiorkor	Included
	Other metabolic diseases	261	Nutritional marasmus	Included
	Other metabolic diseases	262	Other severe protein-energy malnutrition	Included
	Other metabolic diseases	263	Other unspecified protein-energy malnutrition	Included
	Other metabolic diseases	268B	Late effects of rickets	Included
	Other metabolic diseases	268C	Osteomalacia	Included
	Other metabolic diseases	270	Disorders of transport and metabolism of amino acids	Included
	Other metabolic diseases	271	Disorders of transport and metabolism of carbohydrates	Included
	Other metabolic diseases	272H	Lipidoses	Included
	Other metabolic diseases	272W	Other specified disorders in lipid metabolism	Included
	Other metabolic diseases	275	Disorders of mineral metabolism	Included
	Other metabolic diseases	277	Other and unspecified disorders of metabolism	Included
	Other metabolic diseases	579	Malabsorption	Included
	Other metabolic diseases	588X	Disorders resulting from impaired renal tubular function	Included
	Other metabolic diseases	731A	Paget disease of bone [osteitis deformans]	Included
	Other musculoskeletal and joint diseases	15	Tuberculosis in the skeleton and joints	Included
	Other musculoskeletal and joint diseases	717H	Chondromalacia patellae	Included
	Other musculoskeletal and joint diseases	718G	Protrusion of the acetabulum, unspecified	Included
	Other musculoskeletal and joint diseases	718W	Other specified articular cartilage disorder of knee joint	Included
	Other musculoskeletal and joint diseases	718X	Cartilage disease in the knee joint, unspecified	Included
	Other musculoskeletal and joint diseases	722W	Post laminectomy syndrome	Included
	Other musculoskeletal and joint diseases	726A	Adhesive capsulitis in the shoulder joint	Included
	Other musculoskeletal and joint diseases	726B	Rotator cuff syndrome in the shoulder joint and similar conditions	Included
	Other musculoskeletal and joint diseases	726C	Other conditions in the shoulder region not classified elsewhere	Included
	Other musculoskeletal and joint diseases	727A	Synovitis and tenosynovitis	Included
	Other musculoskeletal and joint diseases	727C	Specific form of bursitis	Included
	Other musculoskeletal and joint diseases	727W	Unspecified disease in synovia, tendon and bursa	Included
	Other musculoskeletal and joint diseases	728E	Laxity in ligament	Included
	Other musculoskeletal and joint diseases	728G	Dupuytren's contracture	Included
	Other musculoskeletal and joint diseases	728H	Other fibromatoses	Included
	Other musculoskeletal and joint diseases	728X	Diseases in muscles, ligaments, and fascia, unspecified	Included
	Other musculoskeletal and joint diseases	729B	Myalgia and myositis, unspecified	Included
	Other musculoskeletal and joint diseases	732B	Juvenile osteochondrosis in the hip and pelvis	Included
	Other musculoskeletal and joint diseases	732W	Osteochondropathy, other and unspecified	Included
	Other musculoskeletal and joint diseases	733G	Tietze's syndrome	Included
	Other musculoskeletal and joint diseases	733W	Delayed or absent healing of a fracture	Included
	Other musculoskeletal and joint diseases	733X	Other diseases in bones and cartilage, unspecified	Included
	Other musculoskeletal and joint diseases	734	Flatfoot	Included
	Other musculoskeletal and joint diseases	736	Other acquired deformities of the extremities	Included
	Other musculoskeletal and joint diseases	737B	Kyphosis (acquired)	Included
	Other musculoskeletal and joint diseases	737C	Lordosis (acquired)	Included
	Other musculoskeletal and joint diseases	754D	Congenital hip dislocation	Included
	Other musculoskeletal and joint diseases	754F	Varus deformities of the feet	Included
	Other musculoskeletal and joint diseases	754G	Valgus deformities of the feet	Included
	Other musculoskeletal and joint diseases	754H	Other deformities of the feet	Included
	Other musculoskeletal and joint diseases	754W	Other specified deformities	Included
	Other musculoskeletal and joint diseases	755G	Other deformities of the lower extremities, including the pelvic girdle	Included
	Other musculoskeletal and joint diseases	755W	Other specified deformities of limbs	Included
	Other musculoskeletal and joint diseases	756	Other congenital abnormalities of muscles and skeleton	Included
	Other musculoskeletal and joint diseases	836D	Patellar luxation without complication	Included
	Other musculoskeletal and joint diseases	836E	Patellar luxation with complication	Included
	Other musculoskeletal and joint diseases	869B	Traumatic amputation, with an open wound into the abdominal cavity	Included
	Other musculoskeletal and joint diseases	878	Injury to the genital area, including traumatic amputation	Included
	Other musculoskeletal and joint diseases	879G	Other and unspecified parts of the trunk, without information about complications	Included
	Other musculoskeletal and joint diseases	885	Traumatic amputation of the thumb, total or partial	Included
	Other musculoskeletal and joint diseases	886	Traumatic amputation of other finger(s), total or partial	Included
	Other musculoskeletal and joint diseases	887	Traumatic amputation of arm or hand, total or partial	Included
	Other musculoskeletal and joint diseases	895	Traumatic amputation of toe(s), total or partial	Included
	Other musculoskeletal and joint diseases	896	Traumatic amputation of foot, total or partial	Included
	Other musculoskeletal and joint diseases	897	Traumatic amputation of lower extremity, total or partial	Included
	Other musculoskeletal and joint diseases	905	Sequelae of injuries to musculoskeletal tissues and connective tissue	Included
	Other musculoskeletal and joint diseases	906	Sequelae of injuries to skin and subcutaneous tissue	Included
	Other musculoskeletal and joint diseases	909	Sequelae of other and unspecified effects of external causes	Included
	Other musculoskeletal and joint diseases	996E	Mechanical complication caused by internal orthopedic instrument, implant, and transplant	Included
	Other musculoskeletal and joint diseases	V42E	Bone transplant status	Included
	Other musculoskeletal and joint diseases	V49	Problems with extremities and other issues	Included
	Other musculoskeletal and joint diseases	V52A	Presence of artificial upper limb (complete)(partial)	Included
	Other musculoskeletal and joint diseases	V52B	Presence of artificial lower limb (complete)(partial)	Included
	Other neurological diseases	137B	Late effects of tuberculosis in the central nervous system	Included
	Other neurological diseases	238B	Neoplasm of uncertain or unknown behaviour: Peripheral nerves and autonomic nervous system	Included
	Other neurological diseases	326	Late effects of abscess or chronic infection in the skull	Included
	Other neurological diseases	331D	Communicating hydrocephalus	Included
	Other neurological diseases	331E	Obstructive hydrocephalus	Included
	Other neurological diseases	333	Other extrapyramidal disease and movement disorder	Included
	Other neurological diseases	334A	Friedreich's ataxia	Included
	Other neurological diseases	335	Motorneuron diseases	Included
	Other neurological diseases	336	Other diseases in the spinal cord	Included
	Other neurological diseases	337	Diseases of the autonomic nervous system	Included
	Other neurological diseases	341	Other demyelinating diseases in the central nervous system	Included
	Other neurological diseases	342	Unilateral paralysis	Included
	Other neurological diseases	343	Cerebral Palsy	Included
	Other neurological diseases	344	Other paralysis syndromes	Included
	Other neurological diseases	348	Other disease conditions in the brain	Included
	Other neurological diseases	351	Diseases of the facial nerve	Included
	Other neurological diseases	352	Diseases of other cranial nerves	Included
	Other neurological diseases	358	Myoneural diseases	Included
	Other neurological diseases	359	Muscular dystrophy and other muscle diseases	Included
	Other neurological diseases	721B	Cervical spondylosis with myelopathy	Included
	Other neurological diseases	721E	Thoracic or lumbar spondylosis with myelopathy	Included
	Other neurological diseases	740	Anencephaly and similar malformations	Included
	Other neurological diseases	741	Spina bifida	Included
	Other neurological diseases	742	Other congenital abnormalities in the nervous system	Included
	Other psychiatric and behavioral diseases	291B	Korsakov's psychosis, alcohol-induced	Included
	Other psychiatric and behavioral diseases	291C	Other alcohol-related dementia	Included
	Other psychiatric and behavioral diseases	292W	Other specified drug-induced psychosis	Included
	Other psychiatric and behavioral diseases	293W	Other specified transient organic psychosis	Included
	Other psychiatric and behavioral diseases	294A	Korsakov's psychosis, not alcohol-related or unspecified	Included
	Other psychiatric and behavioral diseases	294W	Other specified chronic organic psychosis	Included
	Other psychiatric and behavioral diseases	302	Sexual disorders	Included
	Other psychiatric and behavioral diseases	303	Alcohol dependence	Included
	Other psychiatric and behavioral diseases	304A	Drug addiction, morphine, and other opioids	Included
	Other psychiatric and behavioral diseases	304B	Drug addiction, barbiturates	Included
	Other psychiatric and behavioral diseases	304C	Drug addiction, cocaine	Included
	Other psychiatric and behavioral diseases	304D	Drug addiction, cannabis	Included
	Other psychiatric and behavioral diseases	304E	Drug addiction, amphetamine, and other psychostimulants	Included
	Other psychiatric and behavioral diseases	304F	Drug addiction, hallucinogens	Included
	Other psychiatric and behavioral diseases	304G	Sniffing of thinner/petrol	Included
	Other psychiatric and behavioral diseases	304H	Drug addiction, combination of several drugs	Included
	Other psychiatric and behavioral diseases	305B	Tobacco addiction	Included
	Other psychiatric and behavioral diseases	307B	Anorexia nervosa	Included
	Other psychiatric and behavioral diseases	307C	Tics	Included
	Other psychiatric and behavioral diseases	307F	Other and unspecified eating disorders	Included
	Other psychiatric and behavioral diseases	310X	Non-psychotic mental disorders after brain injury, unspecified	Included
	Other psychiatric and behavioral diseases	312	Behavioural disorder, not classified elsewhere	Included
	Other psychiatric and behavioral diseases	315	Specific developmental disorders	Included
	Other psychiatric and behavioral diseases	317	Mild intellectual disability	Included
	Other psychiatric and behavioral diseases	318	Other specified intellectual disability	Included
	Other psychiatric and behavioral diseases	319	Unspecified intellectual disability	Included
	Other psychiatric and behavioral diseases	330W	Other cerebral degenerations manifested in childhood	Included
	Other respiratory diseases	011E	Tuberculous pulmonary fibrosis	Included
	Other respiratory diseases	137A	Sequelae of respiratory and unspecified tuberculosis	Included
	Other respiratory diseases	278W	Other specified malnutrition status	Included
	Other respiratory diseases	478H	Other diseases in the larynx not classified elsewhere	Included
	Other respiratory diseases	495X	Allergic alveolitis, unspecified	Included
	Other respiratory diseases	500	Coalworker pneumoconiosis	Included
	Other respiratory diseases	501	Asbestosis	Included
	Other respiratory diseases	502	Pneumoconiosis caused by silica and other silicon compounds than asbestos	Included
	Other respiratory diseases	503	Pneumoconiosis due to other inorganic dusts	Included
	Other respiratory diseases	504	Lung disease due to other dust	Included
	Other respiratory diseases	505	Unspecified pneumoconiosis	Included
	Other respiratory diseases	506E	Chronic respiratory condition due to smoke or steam	Included
	Other respiratory diseases	508B	Chronic and other pulmonary manifestations due to radiation	Included
	Other respiratory diseases	508W	Lung disorders due to other external factors	Included
	Other respiratory diseases	511J	Pleural plaque	Included
	Other respiratory diseases	516X	Other unspecified interstitial lung disease	Included
	Other respiratory diseases	518F	Chronic pulmonary insufficiency following surgery	Included
	Other respiratory diseases	518W	Other lung diseases not classified elsewhere	Included
	Other respiratory diseases	519X	Other respiratory diseases, unspecified	Included
	Other respiratory diseases	748E	Congenital cystic lung	Included
	Other respiratory diseases	748F	Agenesis, hypoplasia, and dysplasia of lung	Included
	Other respiratory diseases	748G	Other malformations of lung	Included
	Other respiratory diseases	748W	Other specified malformations of respiratory system	Included
	Other respiratory diseases	799B	Apnoea	Included
	Other respiratory diseases	V42G	Lung transplant status	Included
	Other respiratory diseases	V42W	Organ transplant status: Other specified organs and tissues	Included
	Other respiratory diseases	V43W	Presence of artificial larynx	Included
	Other skin diseases	692W	Contact dermatitis or eczema of other specified causes	Included
	Other skin diseases	694A	Dermatitis herpetiformis	Included
	Other skin diseases	697A	Lichen planus	Included
	Other skin diseases	698C	Prurigo	Included
	Other skin diseases	698D	Lichen simplex chronicus	Included
	Other skin diseases	701W	Other specified hypertrophic and atrophic condition in the skin	Included
	Other skin diseases	705W	Other specified diseases of the sweat glands	Included
	Other skin diseases	708W	Other urticaria	Included
	Other skin diseases	757B	Congenital ichthyosis	Included
	Other skin diseases	757D	Xeroderma pigmentosum	Included
	Other skin diseases	757X	Congenital malformation of skin, unspecified	Included
	Parkinson and Parkinsonism	094W	Other specified neurosyphilis	Included
	Parkinson and Parkinsonism	332	Parkinson disease	Included
	Parkinson and Parkinsonism	333A	Other degenerative diseases of basal ganglia	Included
	Peripheral neuropathy	053B	Herpes zoster with other complications of the nervous system	Included
	Peripheral neuropathy	138	Sequelae of poliomyelitis	Included
	Peripheral neuropathy	353	Diseases in nerve roots and nerve plexus	Included
	Peripheral neuropathy	354	Mononeuropathies of upper limb	Included
	Peripheral neuropathy	355	Mononeuropathies of lower limb	Included
	Peripheral neuropathy	356	Hereditary and idiopathic neuropathy	Included
	Peripheral neuropathy	357B	Polyneuropathy in collagen vascular disease	Included
	Peripheral neuropathy	357C	Diabetic polyneuropathy	Included
	Peripheral neuropathy	357E	Polyneuropathy in diseases classified elsewhere	Included
	Peripheral neuropathy	357H	Polyneuropathy caused by other toxic substances	Included
	Peripheral neuropathy	357W	Other specified inflammatory and toxic neuropathy	Included
	Peripheral neuropathy	721X	Other spondylosis with radiculopathy	Included
	Peripheral neuropathy	723D	Cervicobrachial syndrome	Included
	Peripheral neuropathy	729C	Neuralgia, neuritis, and radiculitis, unspecified	Included
	Peripheral vascular disease	250G	Diabetes with peripheral circulatory disturbance	Included
	Peripheral vascular disease	440C	Atherosclerosis of arteries of extremities	Included
	Peripheral vascular disease	443	Other peripheral vascular diseases	Included
	Prostate diseases	600	Hyperplasia of prostate	Included
	Prostate diseases	601B	Chronic prostatitis	Included
	Prostate diseases	601W	Other inflammatory diseases of prostate	Included
	Schizophrenia and delusional diseases	295	Schizophrenia	Included
	Schizophrenia and delusional diseases	297	Paranoid state	Included
	Schizophrenia and delusional diseases	298W	Other specified reactive psychosis	Included
	Sleep disorders	307E	Specific sleep disorders	Included
	Sleep disorders	780F	Sleep disorders	Included
	Solid neoplasms	140	Malignant neoplasm: lip	Included
	Solid neoplasms	141	Malignant neoplasm: tongue	Included
	Solid neoplasms	142	Malignant neoplasm: salivary glands	Included
	Solid neoplasms	143	Malignant neoplasm: gums	Included
	Solid neoplasms	144	Malignant neoplasm: mouth	Included
	Solid neoplasms	145	Malignant neoplasm: other and specified oral cavity	Included
	Solid neoplasms	146	Malignant neoplasm: oropharynx	Included
	Solid neoplasms	147	Malignant neoplasm: nasopharynx	Included
	Solid neoplasms	148	Malignant neoplasm: hypopharynx	Included
	Solid neoplasms	149	Malignant neoplasm: other lip, oral cavity and throat	Included
	Solid neoplasms	150	Malignant neoplasm: oesophagus	Included
	Solid neoplasms	151	Malignant neoplasm: stomach	Included
	Solid neoplasms	152	Malignant neoplasm: small intestine including duodenum	Included
	Solid neoplasms	153	Malignant neoplasm: large intestine	Included
	Solid neoplasms	154	Malignant neoplasm: ectum, rectosigmoid junction, and anus	Included
	Solid neoplasms	155	Malignant neoplasm: liver and intrahepatic biliary tract	Included
	Solid neoplasms	156	Malignant neoplasm: gallbladder and extrahepatic biliary tract	Included
	Solid neoplasms	157	Malignant neoplasm: pancreas	Included
	Solid neoplasms	158	Malignant neoplasm: peritoneum and retroperitoneum	Included
	Solid neoplasms	159	Malignant neoplasm: other gastrointestinal and peritoneum	Included
	Solid neoplasms	160	Malignant neoplasm: nasal cavity, middle ear, nasal sinuses	Included
	Solid neoplasms	161	Malignant neoplasm: larynx	Included
	Solid neoplasms	162	Malignant neoplasm: trachea, bronchi, lung	Included
	Solid neoplasms	163	Malignant neoplasm: pleura	Included
	Solid neoplasms	164	Malignant neoplasm: thymus, heart, mediastinum	Included
	Solid neoplasms	165	Malignant neoplasm: other respiratory and thoracic cavity	Included
	Solid neoplasms	170	Malignant neoplasm: bone and cartilage	Included
	Solid neoplasms	171	Malignant neoplasm: connective tissue and other soft tissue	Included
	Solid neoplasms	172	Malignant neoplasm: malignant melanoma	Included
	Solid neoplasms	173	Malignant neoplasm: other skin	Included
	Solid neoplasms	174	Malignant neoplasm: female breast	Included
	Solid neoplasms	175	Malignant neoplasm: male breast	Included
	Solid neoplasms	179	Malignant neoplasm: uterus	Included
	Solid neoplasms	180	Malignant neoplasm: uterine cervix	Included
	Solid neoplasms	181	Malignant neoplasm: placenta	Included
	Solid neoplasms	182	Malignant neoplasm: uterine body	Included
	Solid neoplasms	183	Malignant neoplasm: ovaries	Included
	Solid neoplasms	184	Malignant neoplasm: other and unspecified female genital organs	Included
	Solid neoplasms	185	Malignant neoplasm: prostate	Included
	Solid neoplasms	186	Malignant neoplasm: testicle	Included
	Solid neoplasms	187	Malignant neoplasm: penis and other male genital organs	Included
	Solid neoplasms	188	Malignant neoplasm: urinary bladder	Included
	Solid neoplasms	189	Malignant neoplasm: kidney and other unspecified urinary organs	Included
	Solid neoplasms	190	Malignant neoplasm: eye	Included
	Solid neoplasms	191	Malignant neoplasm: central nervous system	Included
	Solid neoplasms	192	Malignant neoplasm: other and unspecified nervous system	Included
	Solid neoplasms	193	Malignant neoplasm: thyroid	Included
	Solid neoplasms	194	Malignant neoplasm: other endocrine glands and related tissues	Included
	Solid neoplasms	195	Malignant neoplasm: other specified location	Included
	Solid neoplasms	196	Malignant neoplasm: secondary or unspecified lymph nodes	Included
	Solid neoplasms	197	Malignant neoplasm: secondary respiratory or digestive organs	Included
	Solid neoplasms	198	Malignant neoplasm: secondary with other specified location	Included
	Solid neoplasms	199	Malignant neoplasm: without specified location	Included
	Solid neoplasms	225A	Benign neoplasm: brain	Included
	Solid neoplasms	225B	Benign neoplasm: cranial nerves	Included
	Solid neoplasms	225C	Benign neoplasm: cerebral meninges	Included
	Solid neoplasms	225D	Benign neoplasm: spinal cord	Included
	Solid neoplasms	225E	Benign neoplasm: spinal meninges	Included
	Solid neoplasms	230	Carcinoma in situ: digestive organs	Included
	Solid neoplasms	231	Carcinoma in situ: respiratory organs	Included
	Solid neoplasms	232	Carcinoma in situ: skin	Included
	Solid neoplasms	233	Carcinoma in situ: breast and genitourinary	Included
	Solid neoplasms	234	Carcinoma in situ: other and unspecified location	Included
	Solid neoplasms	237H	Neurofibromatosis	Included
	Solid neoplasms	759F	Tuberous sclerosis	Included
	Solid neoplasms	759G	Other hamartoses, not classified elsewhere	Included
	Thyroid diseases	240	Simple and unspecified goitre	Included
	Thyroid diseases	241	Non-toxic nodular goitre	Included
	Thyroid diseases	242	Thyrotoxicosis [hyperthyroidism]	Included
	Thyroid diseases	243	Congenital hypothyroidism	Included
	Thyroid diseases	244	Acquired hypothyroidism	Included
	Thyroid diseases	245C	Autoimmune thyroiditis	Included
	Thyroid diseases	245D	Chronic fibrous thyroiditis	Included
	Thyroid diseases	245W	Other chronic thyroiditis	Included
	Thyroid diseases	246	Other disorders of thyroid	Included
	Venous and lymphatic diseases	448A	Hereditary haemorrhagic telangiectasia	Included
	Venous and lymphatic diseases	454	Varicose veins of lower extremities	Included
	Venous and lymphatic diseases	457A	Postmastectomy lymphoedema syndrome	Included
	Venous and lymphatic diseases	457B	Other lymphoedema	Included
	Venous and lymphatic diseases	457C	Chronic lymphangitis	Included
	Venous and lymphatic diseases	457W	Other noninfective disorders of lymphatic vessels	Included
	Venous and lymphatic diseases	459W	Other unspecified disease in the circulatory system	Included
	Venous and lymphatic diseases	757A	Hereditary lymphoedema	Included
	Anemia	282F	Sickle-cell anemia without crisis	Excluded
	Anemia	283C	Hemoglobinuria caused by hemolysis due to external factors	Excluded
	Anemia	284W	Aplastic anaemia due to other external agents	Excluded
	Blindness, visual impairment	396D		Excluded
	Blood and blood forming organ diseases	286F	Acquired coagulation disorder due to circulating anticoagulants	Excluded
	Blood and blood forming organ diseases	286H	Acquired coagulation disorder due to insufficient production of T coagulation factors	Excluded
	Blood and blood forming organ diseases	287E	Secondary thrombocytopenia	Excluded
	Chronic liver diseases	571A	Alcoholic fatty liver	Excluded
	Chronic liver diseases	571B	Acute alcohol hepatitis	Excluded
	Colitis and related diseases	569A	Anal and rectal polyp	Excluded
	Colitis and related diseases	569D	Haemorrhage of anus and rectum	Excluded
	Colitis and related diseases	569F	Intestinal abscess	Excluded
	Colitis and related diseases	569G	Impaired function of colostomy or enterostomy	Excluded
	Epilepsy	345W	Other specified epilepsy	Excluded
	Glaucoma	365A	Borderline-glaucoma	Excluded
	Other cardiovascular diseases	440C	Atherosclerosis of arteries of extremities	Excluded
	Other eye diseases	364A	Acute iritis	Excluded
	Other eye diseases	375D	Acute and unspecified inflammation of lacrimal passages	Excluded
	Other eye diseases	376A	Acute inflammation of orbit	Excluded
	Other eye diseases	377A	Papilloedema	Excluded
	Other eye diseases	377D	Optic neuritis	Excluded
	Other metabolic diseases	244A	Postprocedural hypothyroidism	Excluded
	Other metabolic diseases	253H	Drug-induced hypopituitarism	Excluded
	Other metabolic diseases	259E	Short stature, not elsewhere classified	Excluded
	Other metabolic diseases	259X	Endocrine disorder, unspecified	Excluded
	Other metabolic diseases	263B	Mild protein-energy malnutrition	Excluded
	Other metabolic diseases	277E	Gilbert syndrome	Excluded
	Other metabolic diseases	277X	Other unspecified metabolic disorders	Excluded
	Other metabolic diseases	579A	Coeliac disease	Excluded
	Other metabolic diseases	579B	Tropical sprue	Excluded
	Other neurological diseases	333B	Essential tremor and other defined forms of tremor	Excluded
	Other neurological diseases	333D	Involuntary movements of organic origin	Excluded
	Other neurological diseases	333F	Other korea	Excluded
	Other neurological diseases	344W	Other specified paralysis syndromes	Excluded
	Other neurological diseases	351A	Bell palsy	Excluded
	Other neurological diseases	357D	Polyneuropathy in malignant diseases	Excluded
	Other neurological diseases	358B	Myasthenia syndrome in diseases classified elsewhere	Excluded
	Other respiratory diseases	518A	Pulmonary collapse	Excluded
	Peripheral neuropathy	357D	Polyneuropathy in neoplastic disease	Excluded
	Peripheral vascular disease	443B	Thromboangiitis obliterans [Buerger]	Excluded
	Peripheral vascular disease	443W	Other specified peripheral vascular diseases	Excluded
	Solid neoplasms	200	Hodgkin lymphoma	Excluded
	Solid neoplasms	201	Other malignant tumours in lymphoid and histiocytic tissue	Excluded
	Solid neoplasms	202	Multiple myeloma and immunoproliferative tumors	Excluded
	Solid neoplasms	203	Lymphoid leukaemia	Excluded
	Solid neoplasms	204	Myeloid leukaemia	Excluded
	Solid neoplasms	205	Monocytic leukaemia	Excluded
	Solid neoplasms	206	Other leukaemias of specified cell type	Excluded
	Solid neoplasms	207	Leukaemia of unspecified cell type	Excluded
	Solid neoplasms	208	Hodgkin lymphoma	Excluded

## Sheet: S3
cancer	icd_10	icd_9
Lung cancer	C34	162
Breast cancer	C50	174
Colorectal cancer	C18–C21	153
Prostate cancer	C61	185
Stomach cancer	C16	151
Pancreatic cancer	C25	157
Liver cancer	C22	155
Esophageal cancer	C15	150
Bladder cancer	C67	188
Kidney cancer	C64	189
Ovarian cancer	C56	183
Cervical cancer	C53	180
Uterine cancer	C54–C55	182
Melanoma	C43	172
Brain cancer	C71	191
Thyroid cancer	C73	193
Leukemia	C91–C95	204–208
Lymphoma	C81–C86, C88, C96	200–202
Multiple myeloma	C90	203
Myelodysplastic syndrome	C92	205

## Sheet: S4
Disease_Group	Number_of_Diseases	Diseases
Cardiovascular	7	Other cardiovascular diseases; Heart failure; Atrial fibrillation; Hypertension; Ischemic heart disease; Cerebrovascular diseases; Peripheral vascular disease
Digestive	6	Colitis and related diseases; Chronic liver diseases; Chronic pancreas, biliary tract and gallbladder diseases; Esophagus, stomach and duodenum diseases; Other digestive diseases; Inflammatory bowel disease
Endocrine	2	Thyroid diseases; Diabetes
Malignancy	2	Solid neoplasms; Hematological neoplasms
Musculoskeletal	4	Osteoporosis; Osteoarthrisis; Inflammatory arthropathies; Other musculoskeletal joint diseases
Neuropsychiatric	4	Depression; Dementia; Schizophrenia and delusional diseases; Other psychiatric and behavioral diseases
Neurosensorial	8	Deafness, Hearing impairment; Other eye diseases; Glaucoma; Migraine and facial pain syndromes; Peripheral neuropathy; Parkinson and Parkinsonism; Epilepsy; Multiple sclerosis
Respiratory	3	COPD, Emphysema, Chronic bronchitis; Other respiratory diseases; Asthma
Urological	3	Chronic kidney diseases; Prostate diseases; Other genitourinary diseases
