# Supplementary material
Source: Research Square preprint supplement (doi:10.21203/rs.3.rs-9173304/v1)
Supplement: Supplementary file 4 [file eb14593c8a48c6a4361c1590.xlsx]

## Sheet: README
	Sheet	Description
	S1	Protein-level heritability estimates using Falconer's formula
	S2	Protein-level heritability estimates using Falconer's formula limited to twin pairs sampled within 7 days of each other
	S3	Protein-level heritability estimates using Falconer's formula limited to twin pairs sampled within 30 days of each other
	S4	Heritability for each organ age using Falconer's formula
	S5	Heritability for each organ age using Falconer's formula limited to twin pairs sampled within 7 days of each other
	S6	Heritability for each organ age using Falconer's formula limited to twin pairs sampled within 30 days of each other
	Sheet	Column description
	S1-3	protein: Protein name
		h2_falconer: Heritability estimate using Falconer's formula
	S4-6	organ: Organ age name
		mz: Pearson correlation within monozygotic twin pairs
		dz: Pearson correlation within dizygotic twin pairs
		h2_falconer: Heritability estimate using Falconer's formula

## Sheet: S1
protein	h2_falconer
A0A0G2JRQ6	0.313995
A0A0J9YY99	0.611074
A1BG	0.854133
A2M	0.680516
AARSD1	0.236569
ABL1	0.124658
ACAA1	0.348877
ACAA2	-0.0304191
ACP6	0.885442
ADAMTS15	0.411875
ADAMTS8	0.659689
ADAMTSL4	0.295679
ADCYAP1R1	-0.0290237
ADGRG1	0.61787
ADGRG6	0.00915582
ADIPOQ	0.600237
ADM	0.300608
AFM	0.672121
AGR3	0.421604
AGT	0.498197
AHSG	0.598057
AIF1	0.383935
AKR1B1	0.100139
AKT3	-0.001691
ALB	0.198916
ALCAM	-0.098577
ALPP	0.589327
AMBP	0.485901
AMIGO2	0.495423
ANGPT2	0.481579
ANKRD54	0.122814
ANPEP	-0.0267664
APBB1IP	0.235228
APCS	0.0311856
APEX1	0.287107
APMAP	0.133822
APOA1	0.579431
APOA2	0.312914
APOA4	0.48498
APOB	0.561497
APOC1	0.427084
APOC2	0.604996
APOC3	0.457345
APOC4	0.637641
APOD	0.591558
APOE	0.732471
APOF	0.56775
APOH	0.784804
APOL1	0.652374
APOM	0.527657
AREG	0.377459
ARG1	0.281024
ARHGAP1	0.203174
ARHGAP25	0.128028
ARSB	0.577991
ATG4A	-0.0146881
ATOX1	0.386132
ATP6AP2	0.597847
ATRN	0.511775
AZGP1	0.603533
B2M	0.260588
BAIAP2	0.305586
BAMBI	0.396905
BCHE	0.619939
BGN	0.295977
BTC	0.288197
BTD	0.517587
C1QA	0.381357
C1QB	0.637652
C1QC	0.453492
C1R	0.602036
C1RL	0.206713
C1S	0.635351
C2	0.748033
C3	0.591781
C4A	0.8255
C4BPA	0.542769
C4BPB	0.437735
C4B_2	0.803451
C5	0.494136
C6	0.56139
C7	0.746954
C8A	0.545766
C8B	0.653079
C8G	0.573928
C9	0.5066
CA1	0.109071
CA11	0.0657819
CA12	0.447325
CA14	0.466462
CA9	0.480435
CALB1	0.313932
CALCOCO1	0.272242
CAMKK1	0.152386
CAPG	0.741474
CASP8	0.243423
CBLN4	0.468731
CCDC126	-0.0645548
CCL8	0.630198
CCN1	0.399145
CCN4	0.665815
CD14	0.34086
CD163	0.127847
CD1C	0.625314
CD207	0.624052
CD27	0.537251
CD28	0.230751
CD300E	0.524724
CD300LF	0.768867
CD302	0.473752
CD33	0.864752
CD38	0.581388
CD44	0.400448
CD5	0.494641
CD5L	0.707549
CDC27	0.194226
CDC37	0.213743
CDH5	0.288427
CDHR2	0.595073
CDKN1A	0.218283
CDKN2D	0.258968
CDNF	0.554186
CEACAM1	0.340622
CEACAM3	0.0692662
CEACAM5	0.747798
CEP20	0.197782
CEP85	0.166368
CES2	0.443528
CES3	0.354943
CETP	0.590275
CFB	0.581024
CFC1	0.288675
CFD	0.391988
CFH	0.651795
CFHR1	0.695696
CFHR2	0.753227
CFHR3	0.492887
CFHR4	0.635974
CFHR5	0.505408
CFI	0.360031
CFP	0.450085
CHAC2	0.0398785
CHL1	0.34648
CIAPIN1	0.30928
CLEC3B	0.447197
CLEC6A	0.527455
CLMP	0.41445
CLU	0.456724
CNDP1	0.640548
CNPY4	0.430447
CNTN2	0.651981
COL6A3	0.19489
COMP	0.239786
COX5B	0.0776776
CP	0.545536
CPB2	0.620439
CPE	0.33931
CPN1	0.816617
CPN2	0.744011
CPVL	0.861667
CPXM1	0.712262
CRACR2A	0.372282
CREG1	0.590915
CRH	0.713756
CRISP2	0.618913
CRISP3	0.134171
CRNN	0.496088
CRP	0.153254
CRTAC1	0.394932
CSF1R	0.174576
CST3	0.128492
CTSF	0.594427
CTSV	0.485773
CXCL8	0.238169
DAB2	0.368075
DBH	0.835816
DCBLD2	0.578785
DCTN1	0.243706
DCTN2	0.0786353
DCXR	0.504038
DDAH1	0.215813
DDX58	0.186576
DEFB4A_DEFB4B	0.611266
DKKL1	1.03735
DLL1	0.468474
DNAJB1	0.417541
DPEP2	0.33264
DPP6	0.605053
DPY30	0.299689
DRG2	0.142263
DSG2	0.0154701
DSG3	0.454183
DSG4	0.961854
DTX3	0.171207
ECM1	0.465802
EDA2R	0.264693
EFEMP1	0.11045
EGFL7	0.448068
ELOA	0.228352
ENTPD2	0.705833
EPHA2	0.344744
EPS8L2	0.233859
ERBB2	0.499478
ERBB4	0.684731
ERBIN	0.254124
ERP44	0.615306
F10	0.410438
F11	0.393875
F12	0.80364
F13B	0.561317
F2	0.492914
F3	0.470877
F5	0.498673
F7	0.100439
F9	0.430217
FAM3B	0.672384
FBLN1	0.523206
FCGBP	0.506683
FCGR2B	0.543451
FCGR3A	0.302792
FCGR3B	0.446067
FCN2	0.504966
FCN3	0.702843
FCRLB	0.650682
FEN1	0.242141
FETUB	0.536668
FGA	0.277827
FGB	-0.0993433
FGF21	0.604504
FGF23	0.487879
FGFBP1	0.476386
FGFR2	0.4412
FGG	0.168178
FLNA	-0.0572955
FLT1	0.151317
FLT3	0.330343
FLT4	0.752342
FN1	0.15937
FOLR1	0.514708
FOLR3	0.968339
FOXO3	0.399811
FURIN	0.536615
FUS	0.215179
FXN	0.166179
GALNT10	0.427054
GALNT2	0.337012
GALNT7	0.326172
GC	0.645387
GCG	0.275712
GCNT1	0.540107
GFAP	0.354293
GFER	0.243641
GFOD2	0.029318
GFRA1	0.510015
GFRA2	0.424609
GGH	0.042461
GH2	0.0504051
GNE	0.0485297
GP1BA	0.468145
GP5	0.274292
GPA33	0.642288
GPC1	0.532668
GPLD1	0.593936
GPX3	0.485244
GRPEL1	0.437298
GSAP	0.0194783
GSN	0.504854
GSTA3	0.261091
HABP2	0.408148
HAGH	0.298533
HAO1	0.516259
HAVCR1	0.673592
HBA2	0.0780751
HBB	0.134206
HBD	0.0433036
HBEGF	0.470747
HBQ1	0.304254
HDGF	0.615717
HGFAC	0.504157
HGS	0.049401
HMBS	0.179868
HP	0.624712
HPGDS	0.44951
HPR	0.806542
HPX	0.792365
HRG	0.799033
HS3ST3B1	0.706911
HS6ST1	0.396858
HSPB6	0.397767
HSPG2	0.111458
HTRA2	0.111194
ICAM1	0.0917618
ICAM2	0.167082
ICOSLG	0.402255
IDUA	0.535883
IGF1	0.209209
IGF1R	0.418365
IGF2	0.394505
IGFALS	0.529445
IGFBP2	0.35506
IGFBP3	0.593
IGHA1	0.729875
IGHA2	0.38937
IGHD	0.609487
IGHG1	0.711445
IGHG2	0.597067
IGHG3	0.728453
IGHG4	0.696222
IGHM	0.69109
IGHV1-2	0.348362
IGHV1-24	0.200986
IGHV1-46	0.306606
IGHV1-8	0.46171
IGHV2-26	0.161827
IGHV2-5	0.481395
IGHV2-70D	0.610973
IGHV3-11	0.23533
IGHV3-15	0.274074
IGHV3-21	0.192905
IGHV3-23	0.452116
IGHV3-35	0.311807
IGHV3-38	0.214363
IGHV3-38-3	0.36637
IGHV3-49	0.411376
IGHV3-64	0.419955
IGHV3-7	0.210436
IGHV3OR16-12	0.269267
IGHV4-28	0.365377
IGHV5-10-1	0.469997
IGHV5-51	0.520564
IGHV6-1	0.488574
IGKC	0.546932
IGKJ1	0.37385
IGKJ3	0.148662
IGKJ5	0.367769
IGKV1-16	0.393594
IGKV1-17	0.464964
IGKV1-5	0.79658
IGKV1-8	0.290251
IGKV3-11	0.303916
IGKV3-20	0.362909
IGKV3D-20	0.267715
IGKV4-1	0.659341
IGKV6-21	0.144922
IGLC7	0.685392
IGLL1	0.462024
IGLL5	0.420148
IGLV1-36	0.382449
IGLV1-40	0.265431
IGLV1-47	0.634251
IGLV1-51	0.497204
IGLV2-11	0.210637
IGLV2-14	0.600161
IGLV2-18	0.53837
IGLV2-23	0.465125
IGLV2-8	0.567266
IGLV3-10	0.315802
IGLV3-19	0.55752
IGLV3-27	0.2751
IGLV3-9	0.369039
IGLV4-60	0.56953
IGLV4-69	0.442778
IGLV6-57	0.603425
IGLV7-46	0.299431
IGLV8-61	0.603365
IGSF3	0.548209
IKZF2	0.280284
IL12A_IL12B	0.6244
IL13RA1	0.5895
IL1RAP	0.700997
IL6	0.13168
INHBC	0.273398
INPP1	0.0423297
INPPL1	-0.0525967
IQGAP2	0.156065
ITGAV	0.252393
ITGB1BP1	0.127307
ITGB5	0.612289
ITGB7	0.616291
ITIH1	0.637281
ITIH2	0.625184
ITIH3	0.55077
ITIH4	0.741139
JCHAIN	0.7976
KAZALD1	0.7503
KDR	0.631119
KIFBP	0.167636
KIR2DL3	0.617622
KIR3DL1	0.833812
KLK1	1.11413
KLK10	0.512853
KLK11	0.58474
KLK12	0.87932
KLK13	0.639484
KLK14	0.582306
KLK4	0.462329
KLK6	0.515809
KLK8	0.516097
KLKB1	0.569273
KNG1	0.53268
KRT18	0.425456
L1CAM	0.752037
LAG3	0.433552
LAT2	0.238137
LBP	0.53435
LCAT	0.274919
LCP1	0.0768311
LDHB	0.0838351
LEFTY2	0.592856
LGALS3BP	0.865804
LGALS7_LGALS7B	0.418739
LHB	0.173865
LPA	1.07016
LPCAT2	0.145842
LRG1	0.452598
LRIG1	0.500609
LRP1	0.398632
LRRC25	0.529475
LSM1	0.0150749
LTA4H	0.0590204
LTBP3	0.371424
LUM	0.499059
LYN	0.207595
LYPD3	0.737584
LYPD8	0.685315
LYVE1	0.398841
LYZ	0.297512
MAEA	0.304258
MANSC1	0.661095
MAP3K5	0.237879
MASP1	0.566723
MASP2	0.0885621
MAVS	0.402181
MBL2	0.833704
MDK	0.28772
MED18	0.196126
METAP2	0.272508
MIA	0.714363
MINPP1	0.155727
MME	0.690383
MMP12	0.320528
MMP9	0.0461004
MMRN1	0.262234
MOG	0.457882
MSLN	0.695717
MSRA	0.237874
MST1	0.419418
MUC16	0.691975
MZT1	0.155069
NAMPT	0.120527
NBL1	0.352089
NCS1	0.380352
NDUFS6	0.0458272
NECTIN4	0.534855
NELL1	0.759119
NFKBIE	0.181619
NINJ1	0.273414
NPTN	-0.037124
NPY	0.35698
NRP1	0.268964
NT5E	0.660102
NTF4	0.16338
NUCB2	0.44764
OGFR	0.677942
OMG	0.365498
OPTC	0.496476
OPTN	0.158823
ORM1	0.503672
ORM2	0.52627
P4HB	0.345762
PCOLCE	0.21043
PCYOX1	0.598156
PDCD1	0.498523
PDCD1LG2	0.757079
PDGFC	0.693538
PDP1	0.142351
PEPD	0.204668
PF4	0.289346
PF4V1	0.47748
PFKFB2	0.259973
PFN1	0.0708865
PGLYRP2	0.580115
PI16	0.473582
PIGR	0.416878
PLA2G15	0.555838
PLG	0.581262
PLTP	0.54021
PLXDC1	0.418593
PLXDC2	0.0997381
PODXL	0.517034
PODXL2	0.67512
POLR2F	0.236814
PON1	0.735492
PON3	0.441494
PPBP	0.443905
PPME1	0.200838
PPP1R12A	0.153096
PPY	0.672886
PQBP1	0.365567
PRDX6	0.185936
PRG4	0.572421
PRKRA	0.142726
PROC	0.343476
PROCR	0.525181
PROS1	0.489653
PROZ	0.667087
PRTG	0.440425
PSMA1	0.00990244
PSMD9	0.107351
PSRC1	0.126271
PTGDS	0.326277
PVALB	0.600183
PVR	0.181189
PZP	0.887059
QSOX1	0.0746387
RAD23B	0.150954
RARRES1	0.302268
RARRES2	0.10262
RASSF2	0.0981428
RBP2	0.564026
RBP4	0.368978
RBP5	0.54848
RET	0.667494
RILP	0.193618
RNF41	0.20883
RP2	0.441486
RRM2	0.197826
RRM2B	0.0850975
RSPO3	0.356601
RTBDN	0.572126
RTN4R	0.489577
RUVBL1	0.18567
S100A12	0.26821
S100A4	0.106026
SAA1	0.135397
SAA2	0.122486
SAA4	0.639518
SCAMP3	0.387779
SCG2	0.433417
SCLY	0.34976
SCP2	0.0186535
SELENOP	0.389084
SELL	0.405358
SEMA4C	0.0108058
SEPTIN9	0.314759
SERPINA1	0.772108
SERPINA10	0.654389
SERPINA3	0.51772
SERPINA4	0.523002
SERPINA6	0.386108
SERPINA7	0.475439
SERPINA9	0.460734
SERPINC1	0.614897
SERPIND1	0.571542
SERPINF1	0.642777
SERPINF2	0.459805
SERPING1	0.851193
SEZ6L	0.564384
SEZ6L2	0.381635
SF3B4	0.0138464
SFTPA1	0.111637
SFTPA2	0.682481
SH2B3	0.0508674
SHBG	0.678648
SIAE	0.479436
SIGLEC6	0.581758
SIGLEC9	0.65875
SIRT2	0.248184
SLAMF6	0.202177
SLAMF8	0.764175
SLC3A2	0.225666
SLITRK2	0.595638
SMAD5	0.549833
SMOC1	0.142004
SNAP29	0.367951
SOD3	0.981198
SORCS2	0.587145
SORD	0.361611
SPARC	0.323222
SPINK6	0.44985
SPP2	0.352705
SPTA1	0.211077
SRC	0.231716
SRP14	0.209406
ST3GAL1	0.471273
STAT5B	0.168363
STX16	0.0382517
STX4	0.288944
STX6	0.398822
STXBP3	0.35345
SUGT1	0.158715
TACC3	0.193281
TACSTD2	0.448929
TAFA5	0.474771
TBC1D23	0.349088
TBL1X	0.260225
TEK	0.569842
TF	0.544406
TFPI	0.0765386
TFPI2	0.28498
TFRC	0.425124
TGFBI	0.387787
TGFBR2	0.453944
THBS1	0.196005
TJAP1	0.270632
TMPRSS15	0.571827
TNF	0.148234
TNFRSF12A	0.316516
TNFRSF19	0.319133
TNXB	0.0201375
TP53	0.0809738
TPMT	0.0635776
TRAJ17	0.0521917
TREML1	0.0934877
TRIAP1	-0.0486174
TTR	0.359504
TXNDC15	0.60242
UBAC1	0.137976
USO1	0.0424742
UXS1	0.469924
VASN	0.101439
VAT1	0.303856
VEGFC	0.455705
VMO1	0.823064
VNN1	0.436486
VNN2	0.627222
VPS37A	0.180284
VPS53	0.293946
VTCN1	0.447782
VTN	0.625538
VWA1	0.314046
VWF	0.386854
WFDC12	0.628086
WFDC2	0.431485
WIF1	0.651289
XCL1	0.429907
XPNPEP2	0.82247
YES1	0.361903
ZBTB16	0.312053

## Sheet: S2
protein	h2_falconer
A0A0G2JRQ6	0.258882
A0A0J9YY99	0.407534
A1BG	0.875499
A2M	0.721731
AARSD1	0.212201
ABL1	0.135438
ACAA1	0.370196
ACAA2	-0.162977
ACP6	0.97065
ADAMTS15	0.374482
ADAMTS8	0.659267
ADAMTSL4	0.317103
ADCYAP1R1	-0.198772
ADGRG1	0.660575
ADGRG6	0.0400821
ADIPOQ	0.572172
ADM	0.229308
AFM	0.750904
AGR3	0.510962
AGT	0.312893
AHSG	0.492193
AIF1	0.381453
AKR1B1	0.00325351
AKT3	0.0255772
ALB	0.155044
ALCAM	0.130584
ALPP	0.680326
AMBP	0.533427
AMIGO2	0.67384
ANGPT2	0.588157
ANKRD54	0.0164362
ANPEP	-0.0715117
APBB1IP	0.136206
APCS	-0.104949
APEX1	0.200821
APMAP	0.185924
APOA1	0.474916
APOA2	0.212048
APOA4	0.491566
APOB	0.63713
APOC1	0.444893
APOC2	0.569218
APOC3	0.453893
APOC4	0.63182
APOD	0.489093
APOE	0.833565
APOF	0.480194
APOH	0.780142
APOL1	0.583143
APOM	0.502381
AREG	0.525253
ARG1	0.219532
ARHGAP1	0.343704
ARHGAP25	0.0731929
ARSB	0.667025
ATG4A	0.0695064
ATOX1	0.516848
ATP6AP2	0.693215
ATRN	0.461763
AZGP1	0.547578
B2M	0.185733
BAIAP2	0.196638
BAMBI	0.343884
BCHE	0.662778
BGN	0.37386
BTC	0.347434
BTD	0.476159
C1QA	0.403696
C1QB	0.732029
C1QC	0.582311
C1R	0.705555
C1RL	0.208926
C1S	0.901895
C2	0.829685
C3	0.626975
C4A	0.730891
C4BPA	0.461093
C4BPB	0.468099
C4B_2	0.80863
C5	0.574237
C6	0.701661
C7	0.837734
C8A	0.551492
C8B	0.616009
C8G	0.577619
C9	0.479287
CA1	0.158261
CA11	-0.0855427
CA12	0.478716
CA14	0.705016
CA9	0.504573
CALB1	0.351764
CALCOCO1	0.374812
CAMKK1	0.0467908
CAPG	0.705212
CASP8	0.244476
CBLN4	0.593703
CCDC126	-0.192424
CCL8	0.678867
CCN1	0.356521
CCN4	0.842835
CD14	0.266552
CD163	0.129474
CD1C	0.553224
CD207	0.706867
CD27	0.470222
CD28	0.303262
CD300E	0.67616
CD300LF	0.803707
CD302	0.415416
CD33	0.98344
CD38	0.573427
CD44	0.523228
CD5	0.62814
CD5L	0.692283
CDC27	0.283893
CDC37	0.139026
CDH5	0.167727
CDHR2	0.604739
CDKN1A	0.199595
CDKN2D	0.189478
CDNF	0.485812
CEACAM1	0.238814
CEACAM3	0.0699558
CEACAM5	0.78869
CEP20	0.278908
CEP85	0.0755933
CES2	0.50282
CES3	0.337763
CETP	0.635961
CFB	0.712645
CFC1	0.383491
CFD	0.435581
CFH	0.541783
CFHR1	0.75609
CFHR2	0.727335
CFHR3	0.480153
CFHR4	0.611043
CFHR5	0.520621
CFI	0.425897
CFP	0.341331
CHAC2	-0.0484581
CHL1	0.29088
CIAPIN1	0.350575
CLEC3B	0.626327
CLEC6A	0.514522
CLMP	0.502875
CLU	0.444422
CNDP1	0.640034
CNPY4	0.500084
CNTN2	0.806622
COL6A3	0.188205
COMP	0.230314
COX5B	0.096452
CP	0.701515
CPB2	0.642361
CPE	0.371905
CPN1	0.769757
CPN2	0.634852
CPVL	0.947089
CPXM1	0.693878
CRACR2A	0.31818
CREG1	0.456692
CRH	0.626859
CRISP2	0.719127
CRISP3	0.229043
CRNN	0.456915
CRP	0.0952331
CRTAC1	0.411529
CSF1R	0.00616907
CST3	0.281708
CTSF	0.400593
CTSV	0.563641
CXCL8	0.313016
DAB2	0.368446
DBH	0.870137
DCBLD2	0.481879
DCTN1	0.238424
DCTN2	0.101472
DCXR	0.532448
DDAH1	0.202678
DDX58	0.266315
DEFB4A_DEFB4B	0.567363
DKKL1	1.03042
DLL1	0.355455
DNAJB1	0.412124
DPEP2	0.29518
DPP6	0.582938
DPY30	0.376845
DRG2	0.186386
DSG2	0.102925
DSG3	0.719974
DSG4	0.984352
DTX3	0.200413
ECM1	0.470455
EDA2R	0.406064
EFEMP1	0.134336
EGFL7	0.324751
ELOA	0.254743
ENTPD2	0.816586
EPHA2	0.401597
EPS8L2	0.358999
ERBB2	0.348334
ERBB4	0.52261
ERBIN	0.133803
ERP44	0.548215
F10	0.394085
F11	0.513164
F12	0.793913
F13B	0.592754
F2	0.541184
F3	0.588333
F5	0.601201
F7	0.141457
F9	0.425012
FAM3B	0.538915
FBLN1	0.522017
FCGBP	0.506252
FCGR2B	0.770534
FCGR3A	0.348847
FCGR3B	0.459205
FCN2	0.511947
FCN3	0.690185
FCRLB	0.59471
FEN1	0.150871
FETUB	0.502872
FGA	0.171771
FGB	-0.11722
FGF21	0.605179
FGF23	0.465181
FGFBP1	0.404267
FGFR2	0.496976
FGG	0.0457654
FLNA	0.190496
FLT1	0.127922
FLT3	0.264638
FLT4	0.779387
FN1	0.223192
FOLR1	0.367108
FOLR3	1.05617
FOXO3	0.378112
FURIN	0.516703
FUS	0.223105
FXN	0.254664
GALNT10	0.425867
GALNT2	0.566435
GALNT7	0.432535
GC	0.662322
GCG	0.274934
GCNT1	0.509852
GFAP	0.522287
GFER	0.113511
GFOD2	-0.010919
GFRA1	0.692761
GFRA2	0.474827
GGH	0.104933
GH2	0.0389574
GNE	0.062001
GP1BA	0.429211
GP5	0.27941
GPA33	0.539813
GPC1	0.820418
GPLD1	0.614628
GPX3	0.597354
GRPEL1	0.446042
GSAP	0.0860607
GSN	0.621807
GSTA3	0.172074
HABP2	0.500987
HAGH	0.422158
HAO1	0.522415
HAVCR1	0.798344
HBA2	0.129624
HBB	0.176897
HBD	0.0497956
HBEGF	0.568179
HBQ1	0.36111
HDGF	0.543561
HGFAC	0.451906
HGS	0.131259
HMBS	0.260391
HP	0.710998
HPGDS	0.480236
HPR	0.802683
HPX	0.690496
HRG	0.880135
HS3ST3B1	0.716076
HS6ST1	0.445421
HSPB6	0.515829
HSPG2	0.176535
HTRA2	0.144406
ICAM1	-0.0300972
ICAM2	0.113331
ICOSLG	0.342172
IDUA	0.601055
IGF1	0.0755957
IGF1R	0.447184
IGF2	0.431057
IGFALS	0.557886
IGFBP2	0.366791
IGFBP3	0.589598
IGHA1	0.789131
IGHA2	0.42702
IGHD	0.663935
IGHG1	0.659435
IGHG2	0.625495
IGHG3	0.703999
IGHG4	0.640015
IGHM	0.673276
IGHV1-2	0.241562
IGHV1-24	0.144343
IGHV1-46	0.247183
IGHV1-8	0.501267
IGHV2-26	0.174025
IGHV2-5	0.425453
IGHV2-70D	0.619996
IGHV3-11	0.302984
IGHV3-15	0.558927
IGHV3-21	0.130791
IGHV3-23	0.428964
IGHV3-35	0.261117
IGHV3-38	0.227512
IGHV3-38-3	0.420612
IGHV3-49	0.315635
IGHV3-64	0.398003
IGHV3-7	0.244671
IGHV3OR16-12	0.426674
IGHV4-28	0.449065
IGHV5-10-1	0.493901
IGHV5-51	0.534216
IGHV6-1	0.531525
IGKC	0.378944
IGKJ1	0.324863
IGKJ3	0.127741
IGKJ5	0.0716419
IGKV1-16	0.228521
IGKV1-17	0.476111
IGKV1-5	0.776622
IGKV1-8	0.173133
IGKV3-11	0.397854
IGKV3-20	0.365619
IGKV3D-20	0.123244
IGKV4-1	0.469546
IGKV6-21	0.0677158
IGLC7	0.726088
IGLL1	0.481919
IGLL5	0.521486
IGLV1-36	0.389564
IGLV1-40	0.296813
IGLV1-47	0.587835
IGLV1-51	0.472118
IGLV2-11	0.138226
IGLV2-14	0.789665
IGLV2-18	0.473558
IGLV2-23	0.491753
IGLV2-8	0.666248
IGLV3-10	0.362188
IGLV3-19	0.603733
IGLV3-27	0.344409
IGLV3-9	0.315663
IGLV4-60	0.52169
IGLV4-69	0.322893
IGLV6-57	0.507526
IGLV7-46	0.359553
IGLV8-61	0.508287
IGSF3	0.702025
IKZF2	0.131269
IL12A_IL12B	0.657265
IL13RA1	0.462657
IL1RAP	0.651887
IL6	0.168786
INHBC	0.0443899
INPP1	0.0409169
INPPL1	-0.226591
IQGAP2	0.218687
ITGAV	0.571828
ITGB1BP1	0.148205
ITGB5	0.565968
ITGB7	0.743979
ITIH1	0.631877
ITIH2	0.666732
ITIH3	0.66771
ITIH4	0.759296
JCHAIN	0.81284
KAZALD1	0.685545
KDR	0.453181
KIFBP	0.102999
KIR2DL3	0.646418
KIR3DL1	0.794849
KLK1	1.0101
KLK10	0.649924
KLK11	0.636739
KLK12	0.994602
KLK13	0.729983
KLK14	0.712204
KLK4	0.338321
KLK6	0.629397
KLK8	0.430074
KLKB1	0.608424
KNG1	0.447404
KRT18	0.485746
L1CAM	0.742666
LAG3	0.617159
LAT2	0.12558
LBP	0.501788
LCAT	0.357143
LCP1	0.112982
LDHB	0.0846734
LEFTY2	0.676427
LGALS3BP	1.05056
LGALS7_LGALS7B	0.400092
LHB	0.127291
LPA	0.98704
LPCAT2	0.115677
LRG1	0.471341
LRIG1	0.637978
LRP1	0.348499
LRRC25	0.685013
LSM1	-0.00833744
LTA4H	0.116086
LTBP3	0.45814
LUM	0.483623
LYN	0.309843
LYPD3	0.617853
LYPD8	0.688406
LYVE1	0.333029
LYZ	0.500681
MAEA	0.392439
MANSC1	0.717957
MAP3K5	0.158119
MASP1	0.636353
MASP2	-0.00389103
MAVS	0.411246
MBL2	0.907803
MDK	0.592295
MED18	0.0809999
METAP2	0.357348
MIA	0.611078
MINPP1	0.0902558
MME	0.736817
MMP12	0.462137
MMP9	0.187467
MMRN1	0.204549
MOG	0.687627
MSLN	0.740679
MSRA	0.0476718
MST1	0.423074
MUC16	0.742571
MZT1	0.116456
NAMPT	0.0410274
NBL1	0.354229
NCS1	0.604602
NDUFS6	0.119876
NECTIN4	0.442843
NELL1	0.63668
NFKBIE	0.17415
NINJ1	0.232775
NPTN	-0.072201
NPY	0.398456
NRP1	0.363488
NT5E	0.564723
NTF4	0.303666
NUCB2	0.731301
OGFR	0.620424
OMG	0.393653
OPTC	0.765255
OPTN	0.20219
ORM1	0.539465
ORM2	0.391848
P4HB	0.13072
PCOLCE	0.168355
PCYOX1	0.617764
PDCD1	0.65443
PDCD1LG2	0.78503
PDGFC	0.632466
PDP1	0.200138
PEPD	0.231064
PF4	0.19302
PF4V1	0.397054
PFKFB2	0.228043
PFN1	-0.0460507
PGLYRP2	0.570492
PI16	0.618311
PIGR	0.529301
PLA2G15	0.493752
PLG	0.580696
PLTP	0.593313
PLXDC1	0.283523
PLXDC2	-0.00617715
PODXL	0.497103
PODXL2	0.674283
POLR2F	0.229015
PON1	0.703107
PON3	0.513437
PPBP	0.437355
PPME1	0.254862
PPP1R12A	0.213555
PPY	0.719334
PQBP1	0.338063
PRDX6	0.343981
PRG4	0.606817
PRKRA	0.174956
PROC	0.366131
PROCR	0.498056
PROS1	0.372852
PROZ	0.714555
PRTG	0.773475
PSMA1	0.0707578
PSMD9	0.111328
PSRC1	0.133863
PTGDS	0.38494
PVALB	0.662397
PVR	0.0218563
PZP	0.949166
QSOX1	0.115797
RAD23B	0.135428
RARRES1	0.387664
RARRES2	0.0969934
RASSF2	0.00383477
RBP2	0.655652
RBP4	0.480764
RBP5	0.585175
RET	0.673537
RILP	0.239169
RNF41	0.11959
RP2	0.577903
RRM2	0.307972
RRM2B	0.0796756
RSPO3	0.51239
RTBDN	0.709029
RTN4R	0.559466
RUVBL1	0.232941
S100A12	0.163914
S100A4	0.189096
SAA1	0.0193371
SAA2	0.086411
SAA4	0.681712
SCAMP3	0.442939
SCG2	0.708014
SCLY	0.311861
SCP2	0.0275642
SELENOP	0.493086
SELL	0.426403
SEMA4C	0.135814
SEPTIN9	0.29802
SERPINA1	0.805217
SERPINA10	0.675651
SERPINA3	0.511693
SERPINA4	0.428462
SERPINA6	0.232167
SERPINA7	0.525307
SERPINA9	0.542723
SERPINC1	0.607263
SERPIND1	0.688232
SERPINF1	0.575129
SERPINF2	0.43795
SERPING1	0.846356
SEZ6L	0.540694
SEZ6L2	0.540608
SF3B4	0.0522555
SFTPA1	0.024126
SFTPA2	0.662625
SH2B3	0.105469
SHBG	0.652104
SIAE	0.334389
SIGLEC6	0.560587
SIGLEC9	0.978796
SIRT2	0.162555
SLAMF6	0.334751
SLAMF8	0.850094
SLC3A2	0.301416
SLITRK2	0.659073
SMAD5	0.640736
SMOC1	0.0968194
SNAP29	0.378191
SOD3	1.09329
SORCS2	0.623056
SORD	0.614997
SPARC	0.331991
SPINK6	0.409603
SPP2	0.305536
SPTA1	0.212063
SRC	0.253584
SRP14	0.181796
ST3GAL1	0.528974
STAT5B	0.0162471
STX16	0.0110901
STX4	0.315455
STX6	0.359473
STXBP3	0.379964
SUGT1	0.212345
TACC3	0.194578
TACSTD2	0.720078
TAFA5	0.596947
TBC1D23	0.385565
TBL1X	0.247525
TEK	0.395031
TF	0.611102
TFPI	0.0343132
TFPI2	0.166645
TFRC	0.539041
TGFBI	0.4052
TGFBR2	0.452295
THBS1	0.213658
TJAP1	0.209095
TMPRSS15	0.612055
TNF	0.233717
TNFRSF12A	0.342227
TNFRSF19	0.540578
TNXB	-0.0932302
TP53	0.0910167
TPMT	0.146827
TRAJ17	-0.0749567
TREML1	0.123651
TRIAP1	0.27945
TTR	0.42433
TXNDC15	0.480846
UBAC1	0.146129
USO1	-0.0176828
UXS1	0.356121
VASN	0.107086
VAT1	0.538887
VEGFC	0.337353
VMO1	0.728921
VNN1	0.568427
VNN2	0.653209
VPS37A	0.229034
VPS53	0.320059
VTCN1	0.505486
VTN	0.75027
VWA1	0.349548
VWF	0.317154
WFDC12	0.652391
WFDC2	0.450574
WIF1	0.906888
XCL1	0.358934
XPNPEP2	0.807556
YES1	0.291202
ZBTB16	0.376443

## Sheet: S3
protein	h2_falconer
A0A0G2JRQ6	0.283954
A0A0J9YY99	0.592754
A1BG	0.807424
A2M	0.70935
AARSD1	0.181658
ABL1	0.096386
ACAA1	0.359709
ACAA2	-0.0987595
ACP6	1.07276
ADAMTS15	0.465859
ADAMTS8	0.695268
ADAMTSL4	0.325182
ADCYAP1R1	-0.0864492
ADGRG1	0.640424
ADGRG6	0.000330036
ADIPOQ	0.600991
ADM	0.325689
AFM	0.695039
AGR3	0.45086
AGT	0.452819
AHSG	0.612854
AIF1	0.422942
AKR1B1	0.066211
AKT3	0.0489101
ALB	0.162872
ALCAM	-0.107462
ALPP	0.583583
AMBP	0.508291
AMIGO2	0.547043
ANGPT2	0.626737
ANKRD54	0.109594
ANPEP	-0.0189187
APBB1IP	0.23976
APCS	0.0701498
APEX1	0.321547
APMAP	0.0959213
APOA1	0.564962
APOA2	0.317122
APOA4	0.456195
APOB	0.548426
APOC1	0.409529
APOC2	0.587137
APOC3	0.411124
APOC4	0.678154
APOD	0.563987
APOE	0.778039
APOF	0.533456
APOH	0.775937
APOL1	0.636648
APOM	0.545429
AREG	0.406977
ARG1	0.336821
ARHGAP1	0.281726
ARHGAP25	0.176122
ARSB	0.548183
ATG4A	0.0189199
ATOX1	0.387679
ATP6AP2	0.559426
ATRN	0.517685
AZGP1	0.601144
B2M	0.242247
BAIAP2	0.277009
BAMBI	0.385334
BCHE	0.637875
BGN	0.309217
BTC	0.278373
BTD	0.493274
C1QA	0.345906
C1QB	0.611292
C1QC	0.469558
C1R	0.585492
C1RL	0.222816
C1S	0.61704
C2	0.699936
C3	0.647321
C4A	0.800394
C4BPA	0.561636
C4BPB	0.502363
C4B_2	0.80807
C5	0.537571
C6	0.627661
C7	0.751872
C8A	0.524698
C8B	0.595404
C8G	0.542135
C9	0.550342
CA1	0.110382
CA11	0.0562225
CA12	0.520058
CA14	0.638965
CA9	0.447502
CALB1	0.28452
CALCOCO1	0.245797
CAMKK1	0.165979
CAPG	0.7954
CASP8	0.298236
CBLN4	0.651935
CCDC126	-0.0956639
CCL8	0.79892
CCN1	0.458189
CCN4	0.858348
CD14	0.303462
CD163	0.178105
CD1C	0.630213
CD207	0.673619
CD27	0.551725
CD28	0.244111
CD300E	0.629866
CD300LF	0.85681
CD302	0.456003
CD33	0.846661
CD38	0.602725
CD44	0.421434
CD5	0.663383
CD5L	0.716539
CDC27	0.244605
CDC37	0.213822
CDH5	0.217091
CDHR2	0.603811
CDKN1A	0.222725
CDKN2D	0.204989
CDNF	0.579282
CEACAM1	0.355622
CEACAM3	0.0783666
CEACAM5	0.7127
CEP20	0.213193
CEP85	0.198595
CES2	0.403638
CES3	0.3869
CETP	0.608503
CFB	0.635727
CFC1	0.310846
CFD	0.412895
CFH	0.697936
CFHR1	0.687355
CFHR2	0.751089
CFHR3	0.467109
CFHR4	0.617693
CFHR5	0.440545
CFI	0.368268
CFP	0.368371
CHAC2	0.00405765
CHL1	0.329559
CIAPIN1	0.282745
CLEC3B	0.553444
CLEC6A	0.528063
CLMP	0.760651
CLU	0.410079
CNDP1	0.658218
CNPY4	0.450661
CNTN2	0.782381
COL6A3	0.217523
COMP	0.277937
COX5B	0.114104
CP	0.503724
CPB2	0.649807
CPE	0.363112
CPN1	0.854769
CPN2	0.747171
CPVL	0.97987
CPXM1	0.734799
CRACR2A	0.324218
CREG1	0.61845
CRH	0.701918
CRISP2	0.70513
CRISP3	0.172433
CRNN	0.431486
CRP	0.123735
CRTAC1	0.416649
CSF1R	0.135962
CST3	0.156553
CTSF	0.591372
CTSV	0.582419
CXCL8	0.2413
DAB2	0.31933
DBH	0.861412
DCBLD2	0.584773
DCTN1	0.269837
DCTN2	0.101898
DCXR	0.524743
DDAH1	0.243968
DDX58	0.24646
DEFB4A_DEFB4B	0.591454
DKKL1	1.06347
DLL1	0.453572
DNAJB1	0.395064
DPEP2	0.376245
DPP6	0.600786
DPY30	0.356298
DRG2	0.146687
DSG2	-0.000906418
DSG3	0.590649
DSG4	0.95117
DTX3	0.174981
ECM1	0.47213
EDA2R	0.415322
EFEMP1	0.127253
EGFL7	0.434584
ELOA	0.272015
ENTPD2	0.745703
EPHA2	0.372801
EPS8L2	0.27566
ERBB2	0.462087
ERBB4	0.673833
ERBIN	0.216938
ERP44	0.595495
F10	0.438913
F11	0.414241
F12	0.809332
F13B	0.555521
F2	0.521454
F3	0.665767
F5	0.51377
F7	0.088452
F9	0.397447
FAM3B	0.651619
FBLN1	0.519858
FCGBP	0.531876
FCGR2B	0.603813
FCGR3A	0.318067
FCGR3B	0.443877
FCN2	0.472483
FCN3	0.66716
FCRLB	0.629632
FEN1	0.282167
FETUB	0.517803
FGA	0.21803
FGB	-0.144578
FGF21	0.605744
FGF23	0.505173
FGFBP1	0.488518
FGFR2	0.476209
FGG	0.196528
FLNA	-0.0112623
FLT1	0.133871
FLT3	0.274868
FLT4	0.77151
FN1	0.171647
FOLR1	0.515483
FOLR3	1.02606
FOXO3	0.399945
FURIN	0.545923
FUS	0.237928
FXN	0.183343
GALNT10	0.407453
GALNT2	0.652605
GALNT7	0.354434
GC	0.641398
GCG	0.281449
GCNT1	0.569792
GFAP	0.360157
GFER	0.287107
GFOD2	0.0219815
GFRA1	0.800614
GFRA2	0.416961
GGH	0.0871529
GH2	0.0150273
GNE	0.0279901
GP1BA	0.476407
GP5	0.274151
GPA33	0.608975
GPC1	0.865909
GPLD1	0.618081
GPX3	0.500361
GRPEL1	0.494129
GSAP	0.0259835
GSN	0.523489
GSTA3	0.29844
HABP2	0.463656
HAGH	0.363791
HAO1	0.578875
HAVCR1	0.787832
HBA2	0.0902338
HBB	0.143356
HBD	0.0322573
HBEGF	0.553254
HBQ1	0.343728
HDGF	0.635342
HGFAC	0.452068
HGS	0.134237
HMBS	0.198366
HP	0.68114
HPGDS	0.448257
HPR	0.795364
HPX	0.779614
HRG	0.811966
HS3ST3B1	0.704595
HS6ST1	0.492062
HSPB6	0.533665
HSPG2	0.104447
HTRA2	0.105772
ICAM1	0.121183
ICAM2	0.168309
ICOSLG	0.382536
IDUA	0.595572
IGF1	0.201389
IGF1R	0.427472
IGF2	0.401354
IGFALS	0.520135
IGFBP2	0.357538
IGFBP3	0.573243
IGHA1	0.751552
IGHA2	0.378056
IGHD	0.638575
IGHG1	0.673838
IGHG2	0.594409
IGHG3	0.68479
IGHG4	0.695386
IGHM	0.705937
IGHV1-2	0.395086
IGHV1-24	0.196237
IGHV1-46	0.322738
IGHV1-8	0.476628
IGHV2-26	0.226521
IGHV2-5	0.433471
IGHV2-70D	0.568922
IGHV3-11	0.310914
IGHV3-15	0.39501
IGHV3-21	0.186289
IGHV3-23	0.495171
IGHV3-35	0.30127
IGHV3-38	0.280416
IGHV3-38-3	0.317171
IGHV3-49	0.429258
IGHV3-64	0.486046
IGHV3-7	0.165128
IGHV3OR16-12	0.292728
IGHV4-28	0.380092
IGHV5-10-1	0.445355
IGHV5-51	0.569486
IGHV6-1	0.485797
IGKC	0.503472
IGKJ1	0.310295
IGKJ3	0.207799
IGKJ5	0.292953
IGKV1-16	0.376807
IGKV1-17	0.440666
IGKV1-5	0.673215
IGKV1-8	0.32913
IGKV3-11	0.300394
IGKV3-20	0.351019
IGKV3D-20	0.290545
IGKV4-1	0.647675
IGKV6-21	0.172912
IGLC7	0.692693
IGLL1	0.431879
IGLL5	0.467113
IGLV1-36	0.335504
IGLV1-40	0.268407
IGLV1-47	0.577121
IGLV1-51	0.505907
IGLV2-11	0.171048
IGLV2-14	0.661116
IGLV2-18	0.557664
IGLV2-23	0.442091
IGLV2-8	0.593612
IGLV3-10	0.324439
IGLV3-19	0.499624
IGLV3-27	0.293237
IGLV3-9	0.305525
IGLV4-60	0.598537
IGLV4-69	0.423654
IGLV6-57	0.566792
IGLV7-46	0.326732
IGLV8-61	0.609753
IGSF3	0.582403
IKZF2	0.249071
IL12A_IL12B	0.61597
IL13RA1	0.567643
IL1RAP	0.693367
IL6	0.146841
INHBC	0.247508
INPP1	0.0224364
INPPL1	-0.114059
IQGAP2	0.137607
ITGAV	0.590865
ITGB1BP1	0.134988
ITGB5	0.637915
ITGB7	0.649032
ITIH1	0.581873
ITIH2	0.605138
ITIH3	0.604481
ITIH4	0.768397
JCHAIN	0.820303
KAZALD1	0.713122
KDR	0.621482
KIFBP	0.124631
KIR2DL3	0.640418
KIR3DL1	0.810524
KLK1	1.09138
KLK10	0.464889
KLK11	0.595554
KLK12	0.896686
KLK13	0.630633
KLK14	0.732883
KLK4	0.494068
KLK6	0.522393
KLK8	0.55112
KLKB1	0.596836
KNG1	0.477023
KRT18	0.509773
L1CAM	0.747148
LAG3	0.419583
LAT2	0.196482
LBP	0.551595
LCAT	0.268358
LCP1	0.0251414
LDHB	0.176657
LEFTY2	0.788473
LGALS3BP	0.862676
LGALS7_LGALS7B	0.411644
LHB	0.168706
LPA	1.02588
LPCAT2	0.148821
LRG1	0.439723
LRIG1	0.772802
LRP1	0.403877
LRRC25	0.559733
LSM1	0.017412
LTA4H	0.0805573
LTBP3	0.369664
LUM	0.500911
LYN	0.215883
LYPD3	0.745986
LYPD8	0.673023
LYVE1	0.377354
LYZ	0.357089
MAEA	0.258141
MANSC1	0.715765
MAP3K5	0.213172
MASP1	0.558611
MASP2	0.0422171
MAVS	0.345366
MBL2	0.844959
MDK	0.330701
MED18	0.150465
METAP2	0.289277
MIA	0.717247
MINPP1	0.0947411
MME	0.710677
MMP12	0.403138
MMP9	0.115923
MMRN1	0.262444
MOG	0.522182
MSLN	0.690659
MSRA	0.237319
MST1	0.413816
MUC16	0.722841
MZT1	0.136046
NAMPT	0.0674948
NBL1	0.372557
NCS1	0.68701
NDUFS6	0.05348
NECTIN4	0.54864
NELL1	0.704386
NFKBIE	0.172607
NINJ1	0.317542
NPTN	-0.00975305
NPY	0.390776
NRP1	0.22455
NT5E	0.697431
NTF4	0.202323
NUCB2	0.755116
OGFR	0.641929
OMG	0.37081
OPTC	0.507818
OPTN	0.202161
ORM1	0.520491
ORM2	0.536009
P4HB	0.299963
PCOLCE	0.283825
PCYOX1	0.632479
PDCD1	0.494647
PDCD1LG2	0.734748
PDGFC	0.649078
PDP1	0.136889
PEPD	0.157617
PF4	0.277781
PF4V1	0.479997
PFKFB2	0.233798
PFN1	0.0444449
PGLYRP2	0.572318
PI16	0.472143
PIGR	0.41175
PLA2G15	0.565313
PLG	0.594448
PLTP	0.613383
PLXDC1	0.445905
PLXDC2	0.0514652
PODXL	0.4956
PODXL2	0.680799
POLR2F	0.213311
PON1	0.725388
PON3	0.478607
PPBP	0.43044
PPME1	0.211787
PPP1R12A	0.100491
PPY	0.732598
PQBP1	0.393886
PRDX6	0.25004
PRG4	0.594008
PRKRA	0.133326
PROC	0.326133
PROCR	0.520216
PROS1	0.456707
PROZ	0.69572
PRTG	0.736737
PSMA1	0.0670297
PSMD9	0.115332
PSRC1	0.120314
PTGDS	0.342253
PVALB	0.644204
PVR	0.224197
PZP	0.881255
QSOX1	0.0863191
RAD23B	0.143581
RARRES1	0.374135
RARRES2	0.120857
RASSF2	0.0871246
RBP2	0.566927
RBP4	0.369615
RBP5	0.598381
RET	0.661989
RILP	0.211791
RNF41	0.185539
RP2	0.439158
RRM2	0.183078
RRM2B	0.150849
RSPO3	0.514088
RTBDN	0.58658
RTN4R	0.60955
RUVBL1	0.164609
S100A12	0.234552
S100A4	0.159546
SAA1	0.115899
SAA2	0.101729
SAA4	0.622057
SCAMP3	0.333987
SCG2	0.601812
SCLY	0.403393
SCP2	0.0334442
SELENOP	0.413575
SELL	0.421135
SEMA4C	0.0280323
SEPTIN9	0.367546
SERPINA1	0.733978
SERPINA10	0.684876
SERPINA3	0.506834
SERPINA4	0.475384
SERPINA6	0.359999
SERPINA7	0.447561
SERPINA9	0.433149
SERPINC1	0.609132
SERPIND1	0.647208
SERPINF1	0.649606
SERPINF2	0.419071
SERPING1	0.844431
SEZ6L	0.570153
SEZ6L2	0.416719
SF3B4	-0.0277325
SFTPA1	0.138321
SFTPA2	0.627323
SH2B3	0.0431263
SHBG	0.719285
SIAE	0.446053
SIGLEC6	0.800434
SIGLEC9	0.97399
SIRT2	0.218987
SLAMF6	0.20644
SLAMF8	0.783727
SLC3A2	0.299381
SLITRK2	0.770488
SMAD5	0.567631
SMOC1	0.189494
SNAP29	0.330325
SOD3	1.06773
SORCS2	0.590076
SORD	0.416051
SPARC	0.262566
SPINK6	0.411594
SPP2	0.359358
SPTA1	0.208258
SRC	0.189899
SRP14	0.239867
ST3GAL1	0.448734
STAT5B	0.123092
STX16	0.0625741
STX4	0.200899
STX6	0.390499
STXBP3	0.351986
SUGT1	0.189455
TACC3	0.16198
TACSTD2	0.634331
TAFA5	0.469425
TBC1D23	0.286775
TBL1X	0.336912
TEK	0.540979
TF	0.495269
TFPI	0.0783474
TFPI2	0.203944
TFRC	0.510928
TGFBI	0.394968
TGFBR2	0.472973
THBS1	0.213633
TJAP1	0.195074
TMPRSS15	0.556594
TNF	0.138217
TNFRSF12A	0.296098
TNFRSF19	0.576435
TNXB	-0.0162754
TP53	0.0676361
TPMT	0.0782294
TRAJ17	0.0521842
TREML1	0.0662284
TRIAP1	-0.0380633
TTR	0.320706
TXNDC15	0.611482
UBAC1	0.156088
USO1	-0.018276
UXS1	0.413023
VASN	0.0747553
VAT1	0.314639
VEGFC	0.45999
VMO1	0.804967
VNN1	0.448735
VNN2	0.651383
VPS37A	0.223036
VPS53	0.318088
VTCN1	0.451817
VTN	0.657697
VWA1	0.410355
VWF	0.415323
WFDC12	0.709599
WFDC2	0.481532
WIF1	0.956757
XCL1	0.383296
XPNPEP2	0.811851
YES1	0.259802
ZBTB16	0.30531

## Sheet: S4
organ	mz	dz	h2_falconer
Prostate	0.578458	0.224572	0.707772
Liver	0.547804	0.212656	0.670296
Lung	0.475649	0.168877	0.613545
Endocrine	0.495322	0.204532	0.58158
Pancreas	0.460359	0.17022	0.580277
Nerve	0.52698	0.256431	0.541097
Kidney And Bladder	0.498085	0.234986	0.526199
Skin	0.472587	0.221116	0.502942
Adipose	0.438375	0.190665	0.49542
Cardiovascular	0.546885	0.306588	0.480593
Gastrointestinal	0.478193	0.256492	0.443403
Brain	0.462777	0.24411	0.437334
Immune	0.417858	0.212287	0.411142
Ovary	0.425659	0.244897	0.361524
Muscle	0.423857	0.257475	0.332763

## Sheet: S5
organ	mz	dz	h2_falconer
Prostate	0.599094	0.13895	0.920287
Adipose	0.561158	0.187578	0.747161
Liver	0.602475	0.234024	0.736903
Nerve	0.603921	0.256953	0.693937
Endocrine	0.516547	0.172984	0.687125
Skin	0.560848	0.247909	0.625878
Kidney And Bladder	0.543702	0.23476	0.617883
Immune	0.494099	0.193301	0.601594
Lung	0.503296	0.207495	0.591602
Pancreas	0.442187	0.147307	0.58976
Muscle	0.530501	0.248101	0.564799
Cardiovascular	0.622017	0.351698	0.540638
Gastrointestinal	0.524308	0.262248	0.524119
Brain	0.526479	0.279484	0.493991
Ovary	0.41934	0.196339	0.446001

## Sheet: S6
organ	mz	dz	h2_falconer
Liver	0.559421	0.191661	0.735521
Prostate	0.572488	0.215942	0.713091
Adipose	0.536975	0.181165	0.711619
Lung	0.507606	0.155842	0.703528
Endocrine	0.505007	0.183163	0.643687
Skin	0.52471	0.208938	0.631544
Nerve	0.551242	0.25124	0.600004
Kidney And Bladder	0.520404	0.222089	0.59663
Pancreas	0.452267	0.166745	0.571045
Cardiovascular	0.575569	0.300102	0.550935
Immune	0.436562	0.17458	0.523964
Gastrointestinal	0.496465	0.255998	0.480934
Brain	0.46813	0.22944	0.47738
Ovary	0.444912	0.229607	0.43061
Muscle	0.43266	0.257713	0.349894
